# Supplementary material for: Rh-catalyzed chemo-, stereo- and regioselective C–H cascade annulation of indolyloxopropanenitriles for pyranoindoles
Source: Royal Society of Chemistry journal article supplement (doi:10.1039/d3cc02762g), 2023-01-01
Supplement: d3cc02762g1.pdf [file d3cc02762g1.pdf]

## Supporting Information

### Rh-Catalyzed Chemo-, Stereo- and Regioselective C-H Cascade Annulation of indolyloxopropanenitriles for Pyranoindoles

Ramesh Kotipalli,<sup>a,b</sup> Undamatla Suri Babu,<sup>a,b</sup> Jagadeesh Babu Nanubolu<sup>c</sup> and Maddi Sridhar Reddy\*<sup>a,b</sup>

<sup>a</sup>Department of Organic Synthesis & Process Chemistry, CSIR-Indian Institute of Chemical Technology, Hyderabad 500007, India.

<sup>b</sup>Academy of Scientific and Innovative Research, Ghaziabad 201002, India. <sup>c</sup>Analytical Department, CSIR-IICT, Hyderabad 500007, India.

| S. No. | Table of Contents                                             | Pages   |
|--------|---------------------------------------------------------------|---------|
| 1      | General Information and methods                               | S2      |
| 2      | Experimental Procedures                                       | S2-S4   |
| 3      | Optimization Studies                                          | S5-S6   |
| 4      | General Procedure for title compounds and Characteristic data | S7-S20  |
| 5      | Deuterium labelling & KIE Studies                             | S20-S25 |
| 6      | Copies of <sup>1</sup> H and <sup>13</sup> C NMR spectra      | S25-S58 |
| 7      | X-ray crystallography data                                    | S59-S64 |
| 8      | References                                                    | S65     |

## 1. General Information and methods.

All reagents and solvents were purchased from commercial sources and used without purification. NMR spectra were recorded with a 300, 400 or 500 MHz spectrometer for  $^1\text{H}$  NMR, 100 or 125 MHz for  $^{13}\text{C}$  NMR spectroscopy. Chemical shifts are reported relative to the residual signals of tetramethyl silane in  $\text{CDCl}_3$  or deuterated solvent  $\text{CDCl}_3$  and DMSO for  $^1\text{H}$  and  $^{13}\text{C}$  NMR spectroscopy. Multiplicities are reported as follows: singlet (s), doublet (d), doublet of doublets (dd), doublet of triplets (dt), triplet (t), quartet (q), multiplet (m). HRMS were recorded by using ORBITRAP and ESI mass spectrometer. Column chromatography was performed with silica gel (100–200 mesh) as the stationary phase. All reactions were monitored by using TLC.

Following the known procedure, 3-cyanoacetylindoles<sup>1</sup> and 4-hydroxy-2-alkynoate Derivatives<sup>2</sup> were prepared (Table S1 and S2).

## 2. Experimental Procedures

### 2.1. Preparation of substituted 3-cyanoacetylindoles: General Procedure (GP-1):

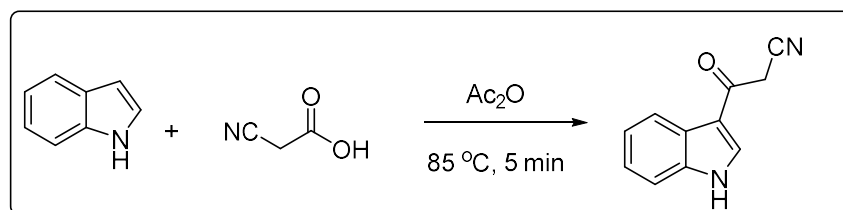

### General Procedure for the Synthesis of 3-cyanoacetylindoles(1a-1k):

3-cyanoacetylindoles were prepared according to the reported procedures.<sup>1</sup> Indole (5.85 g, 50 mmol) was added to a solution of cyanoacetic acid (5.0 g, 50 mmol) in Ac<sub>2</sub>O (50 mL) preheated to 50 °C. The solution was heated at 85 °C and stirred for 5 minutes. 3-cyanoacetylindole started to crystallize slowly. After 5 more minutes, the mixture was slowly allowed to cool and the solid was collected through filtration and washed with MeOH before drying. For pyrrole derivative reaction time 4h, cool to room temperature, neutral with saturated aqueous NaHCO<sub>3</sub> and extracted with DCM. The combined organic extracts were washed with brine, dried over sodium sulfate and concentrated under reduced pressure. The crude residue was purified by flash chromatography on silica gel with EtOAc/petroleum ether to give the corresponding 3-oxo-3-(1H-pyrrol-2-yl)propanenitrile.

### Table S1: List of 3-cyanoacetylindoles.

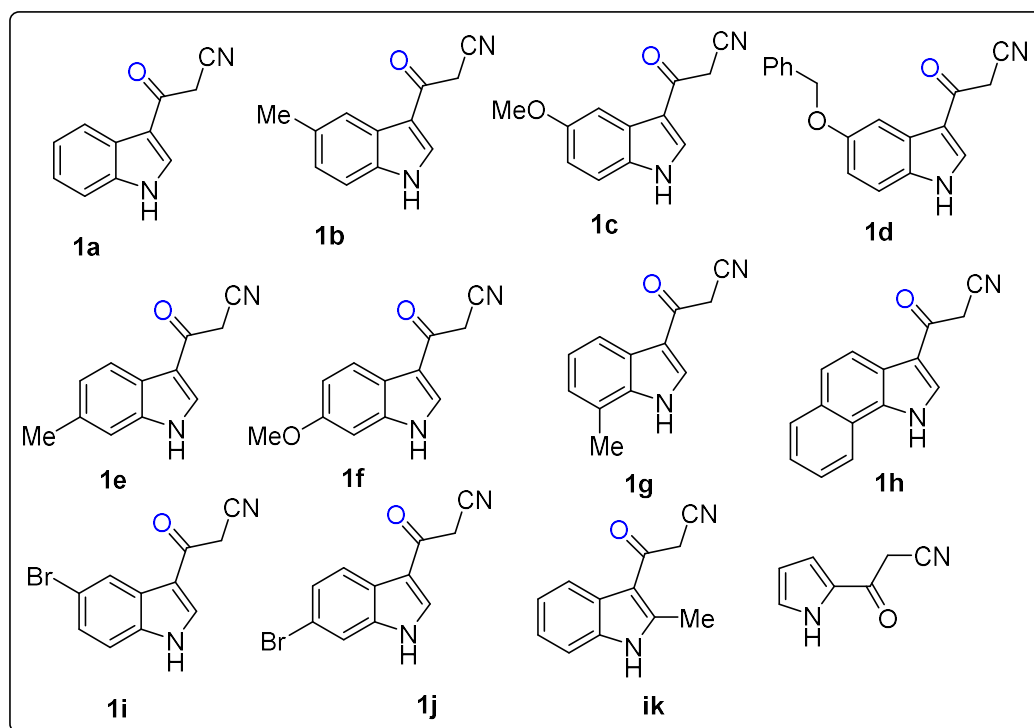

### 2.3 Preparation of 3-Oxo-nitrile Substrates

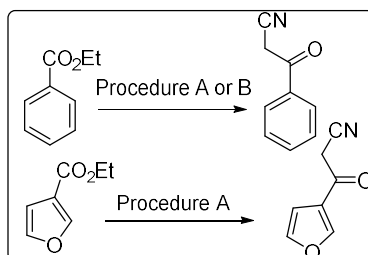

**Procedure A:**<sup>6a</sup> Ethyl ester (6.65 mmol, 1 equiv) was dissolved in THF (30 mL) with stirring at ambient temperature. Potassium tert-butoxide (1.57 g, 14.0 mmol, 95%, 2 equiv) was added to the above THF solution. After stirring enough the flask, acetonitrile (6.65 mmol, 1 equiv) was then added. The resulting mixture was stirred at ambient temperature for 3 h. The reaction mixture was quenched by addition of water (50 mL) and then stirred for 5 min. After adding ethyl acetate (40 mL) and then HCl solution (1 mL, 12 M), the organic layer was separated and dried over anhydrous magnesium sulfate. The solvent was evaporated under reduced pressure and the resulting residue was purified by flash column chromatography on silica gel with EtOAc/petroleum ether to give the corresponding  $\beta$ -ketonitriles

**Procedure B:**<sup>6b</sup> To a solution of ester (10 mmol, 1.0 equiv) in THF (20 mL) under a nitrogen atmosphere was added NaH (15 mmol, 60 % dispersion in mineral oil, 1.5 equiv) at r.t and the mixture was stirred for 30 min. Acetonitrile (20 mL) was added dropwise and the reaction mixture was stirred at 60 °C for 12 h. The reaction was quenched with H<sub>2</sub>O and the solvent was removed in vacuo. The water phase was extracted with ethyl acetate (3×25 mL). The combined organic phase was dried over anhydrous Na<sub>2</sub>SO<sub>4</sub> and then concentrated in vacuo.

The residue was purified by column chromatography on silica gel (petroleum ether: ethyl acetate = 3:1) to obtain the corresponding 3-oxo-3-propanenitrile.

## 2.2. Preparation of 4-hydroxy-2-alkynoates:

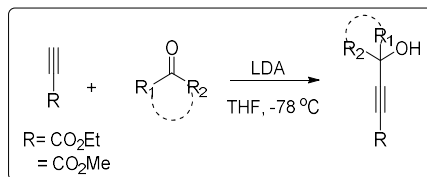

### General Procedure for the Synthesis of 4-hydroxy-2-alkynoates(2a-2u)<sup>2</sup>:

To a solution of alkyl propiolate (4.5 mmol) in tetrahydrofuran (20 mL), lithium diisopropylamide (1.6 M in hexane, 4.5 mmol) was added drop wise by syringe at  $-78 \text{ } ^\circ\text{C}$ . After stirring for 1 h, a solution of ketone (3 mmol) in THF (5 mL) was added drop wise and the mixture was stirred at the same temperature for 2h. The solution was then allowed to warm to room temperature, quenched with saturated aqueous  $\text{NH}_4\text{Cl}$  and extracted with ethyl acetate. The combined organic extracts were washed with brine, dried over sodium sulfate and concentrated under reduced pressure. The crude residue was purified by flash chromatography on silica gel (EtOAc:Hexanes) to get the expected 4-hydroxy-2-alkynoates.

**Table S2: List of 4-hydroxy-2-alkynoates.**

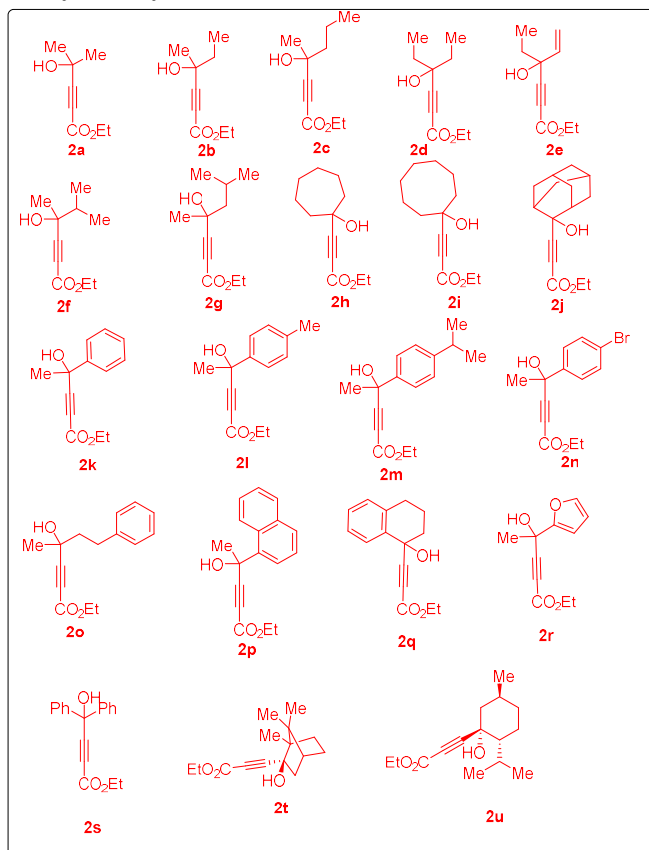

### 3. Optimization Studies:

**Table S1: Optimization of Metal Catalyst.<sup>a</sup>**

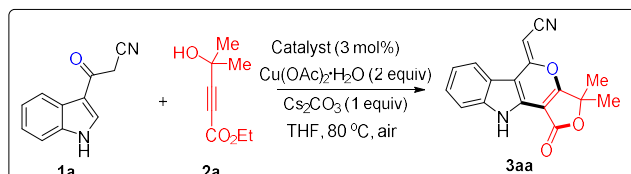

| Entry    | Metal Catalyst                                  | Yield of <b>3aa</b> |
|----------|-------------------------------------------------|---------------------|
| 1        | Pd(OAc) <sub>2</sub>                            | --                  |
| 2        | --                                              | --                  |
| 3        | [RuCl <sub>2</sub> (p-cymene)] <sub>2</sub>     | trace               |
| <b>4</b> | <b>[Cp*<i>Rh</i>Cl<sub>2</sub>]<sub>2</sub></b> | <b>73%</b>          |
| 5        | [Cp*Co(CO)I <sub>2</sub> ]                      | --                  |
| 6        | MnBr(CO) <sub>5</sub>                           | --                  |
| 7        | Co(OAc) <sub>2</sub>                            | --                  |

<sup>a</sup>Reaction conditions: **1a** (0.3 mmol), **2a** (0.3 mmol), catalyst (3 mol%), Cu(OAc)<sub>2</sub>·H<sub>2</sub>O (2 equiv), Cs<sub>2</sub>CO<sub>3</sub> (1 equiv), THF, 80 °C, 5 hours under an air balloon. n.r. = no reaction.

**Table S2: Optimization of Oxidant.<sup>a</sup>**

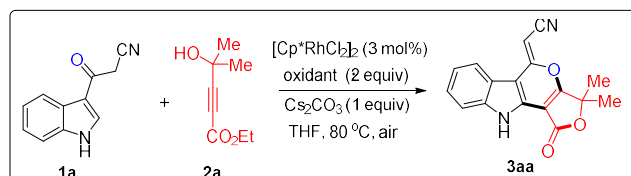

| Entry    | Oxidant                                   | Yield of <b>3aa</b> |
|----------|-------------------------------------------|---------------------|
| 1        | Zn(OAc) <sub>2</sub> ·2H <sub>2</sub> O   | 44%                 |
| 2        | AgOAc                                     | 38%                 |
| <b>3</b> | <b>Cu(OAc)<sub>2</sub>·H<sub>2</sub>O</b> | <b>73%</b>          |
| 4        | ---                                       | ---                 |
| 5        | Ag <sub>2</sub> CO <sub>3</sub>           | 22%                 |
| 6        | PhI(OAc) <sub>2</sub>                     | n.r.                |

<sup>a</sup>Reaction conditions: **1a** (0.3 mmol), **2a** (0.3 mmol), [RhCp\*Cl<sub>2</sub>]<sub>2</sub> (3 mol %), Oxidant (2 equiv), Cs<sub>2</sub>CO<sub>3</sub> (1 equiv), THF, 80 °C, 5 hours under an air balloon. n.r. = no reaction.

**Table S3: Optimization of base.<sup>a</sup>**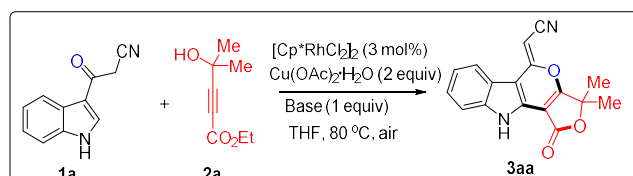

| Entry    | base                                                                                       | Yield of <b>3aa</b> |
|----------|--------------------------------------------------------------------------------------------|---------------------|
| 1        | CsOAc                                                                                      | ---                 |
| 2        | ---                                                                                        | ---                 |
| <b>3</b> | <b>Cs<sub>2</sub>CO<sub>3</sub></b>                                                        | <b>73%</b>          |
| 4        | K <sub>2</sub> CO <sub>3</sub>                                                             | 35%                 |
| 5        | (C <sub>2</sub> H <sub>5</sub> ) <sub>3</sub> N instead of Cs <sub>2</sub> CO <sub>3</sub> | 30%                 |

<sup>a</sup>Reaction conditions: **1a** (0.3 mmol), **2a** (0.3 mmol),  $[\text{RhCp}^*\text{Cl}_2]_2$  (3 mol %),  $\text{Cu}(\text{OAc})_2 \cdot \text{H}_2\text{O}$  (2equiv), base (1 equiv), THF, 80 °C, 5 hours under an air balloon. n.r. = no reaction.

**Table S4: Optimization of Solvent.<sup>a</sup>**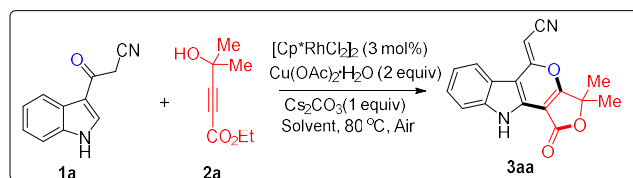

| Entry | Solvent        | Yield of <b>3aa</b> |
|-------|----------------|---------------------|
| 1     | DCE            | 68%                 |
| 2     | <i>t</i> -AmOH | ---                 |
| 3     | MeCN           | n.r.                |
| 4     | <b>THF</b>     | <b>73%</b>          |
| 5     | DMF            | n.r.                |
| 6     | 1,4-Dioxan     | n.r.                |

<sup>a</sup>Reaction conditions: **1a** (0.3 mmol), **2a** (0.3 mmol),  $[\text{RhCp}^*\text{Cl}_2]_2$  (3 mol %),  $\text{Cu}(\text{OAc})_2 \cdot \text{H}_2\text{O}$  (2equiv), Cs<sub>2</sub>CO<sub>3</sub> (1 equiv), solvent, 80 °C, 5 hours under an air balloon. n.r. = no reaction

#### 4. General Procedure for title compounds **3** and Characteristic data: General Procedure for title compounds taking **3aa** as an example:

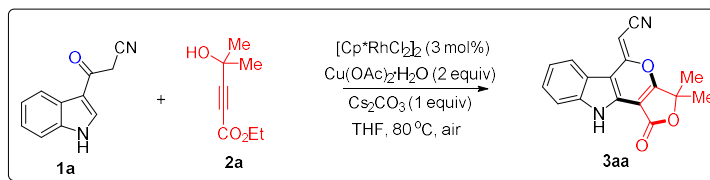

To a mixture of 3-(1H-indol-3-yl)-3-oxopropanenitrile **1a** (55 mg, 0.3 mmol) and 4-hydroxyalkynoate derivative **2a** (46.8mg, 0.3 mmol) in THF,  $[\text{RhCp}^*\text{Cl}_2]_2$  (5.6 mg, 3 mol %),  $\text{Cu}(\text{OAc})_2 \cdot \text{H}_2\text{O}$  (119 mg, 2 equiv),  $\text{Cs}_2\text{CO}_3$  (97.5 mg, 1 equiv) were introduced and the reaction mixture was stirred at 80 °C (oil bath) for 5 hours under air balloon. After completion of reaction (monitored by TLC), THF was evaporated, water was added and the contents were extracted with ethyl acetate (2×10 mL). The organic layer was evaporated and the residue was purified by column chromatography ( $R_f = 0.50$ ) ( $\text{SiO}_2$ , EtOAc:Hexane, 14:86) to get **3aa** as white solid in 73% (63.7mg) yield; mp 193-198 °C.

**(Z)-2-(3,3-dimethyl-1-oxo-3,10-dihydrofuro[3',4':5,6]pyrano[4,3-b]indol-5(1H)-ylidene)acetonitrile (3aa):**

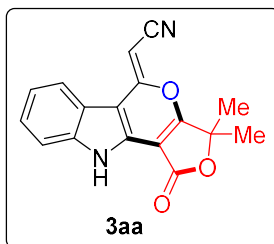

$^1\text{H}$  NMR (400 MHz, DMSO)  $\delta$  12.91 (s, 1H), 7.93 (d,  $J = 5.1$  Hz, 1H), 7.60 (d,  $J = 5.5$  Hz, 1H), 7.34 (dd,  $J = 18.4, 6.5$  Hz, 2H), 5.42 (s, 1H), 1.68 (s, 6H).  $^{13}\text{C}$  NMR (100 MHz, DMSO)  $\delta$  177.0, 164.4, 162.7, 138.3, 130.6, 124.6, 122.6, 119.7, 113.2, 101.3, 98.0, 82.7, 64.8, 24.0. HRMS (ESI) calcd for  $\text{C}_{17}\text{H}_{11}\text{N}_2\text{O}_3$   $[\text{M}-\text{H}]^-$  291.0769, found 291.0771.

**(Z)-2-(3-ethyl-3-methyl-1-oxo-3,10-dihydrofuro[3',4':5,6]pyrano[4,3-b]indol-5(1H)-ylidene)acetonitrile (3ab):**

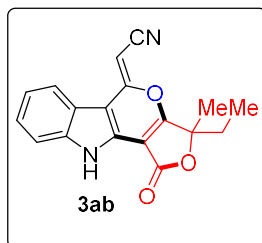

The title compound was prepared from **1a** (55 mg, 0.3 mmol) and **2b** (51 mg, 0.3 mmol) according to general procedure A. Purification using column chromatography ( $R_f$  = 0.50, SiO<sub>2</sub>, EtOAc:Hexane, 15:85) gave pure product as an off-white solid (64, 70% yield), mp 242-247 °C. <sup>1</sup>H NMR (400 MHz, CDCl<sub>3</sub>) δ 9.79 (s, 1H), 7.66 (d,  $J$  = 7.5 Hz, 1H), 7.57 (d,  $J$  = 7.9 Hz, 1H), 7.46 – 7.36 (m, 2H), 4.99 (s, 1H), 2.11 (dd,  $J$  = 7.3, 2.6 Hz, 2H), 1.76 (s, 3H), 0.98 (t,  $J$  = 7.3 Hz, 3H). <sup>13</sup>C NMR (100 MHz, CDCl<sub>3</sub>) δ 177.0, 165.8, 163.1, 137.6, 130.2, 125.5, 123.5, 119.6, 112.9, 102.6, 99.0, 86.8, 66.9, 30.61, 23.0, 7.90. HRMS (ESI) calcd for C<sub>18</sub>H<sub>13</sub>O<sub>3</sub>N<sub>2</sub> [M-H]<sup>-</sup> 305.0926, found 305.0926.

**(Z)-2-(3-methyl-1-oxo-3-propyl-3,10-dihydrofuro[3',4':5,6]pyrano[4,3-b]indol-5(1H)-ylidene)acetonitrile (3ac):**

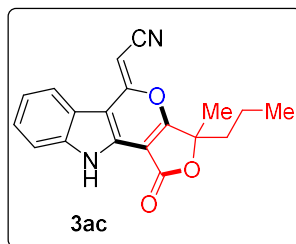

The title compound was prepared from **1a** (55 mg, 0.3 mmol) and **2c** (55 mg, 0.3 mmol) according to general procedure A. Purification using column chromatography ( $R_f$  = 0.51, SiO<sub>2</sub>, EtOAc:Hexane, 14:86) gave pure product as a pale yellow solid (67 mg, 70% yield), mp 195-198 °C. <sup>1</sup>H NMR (400 MHz, CDCl<sub>3</sub>) δ 9.81 (s, 1H), 7.65 (d,  $J$  = 7.2 Hz, 1H), 7.59 (d,  $J$  = 7.5 Hz, 1H), 7.47 – 7.36 (m, 2H), 4.99 (s, 1H), 2.03 (dd,  $J$  = 12.1, 7.2 Hz, 2H), 1.75 (s, 3H), 1.33 – 1.24 (m, 2H), 0.96 (t,  $J$  = 7.0 Hz, 3H). <sup>13</sup>C NMR (100 MHz, CDCl<sub>3</sub>) δ 177.2, 165.8, 163.1, 137.7, 130.2, 125.5, 123.4, 121.7, 119.6, 113.0, 102.6, 98.9, 86.6, 66.8, 39.4, 23.3, 16.9, 14.0. HRMS (ESI) calcd for C<sub>19</sub>H<sub>17</sub>N<sub>2</sub>O<sub>3</sub> [M+H]<sup>+</sup> 321.1239, found 321.1223.

**(Z)-2-(3,3-diethyl-1-oxo-3,10-dihydrofuro[3',4':5,6]pyrano[4,3-b]indol-5(1H)-ylidene)acetonitrile (3ad):**

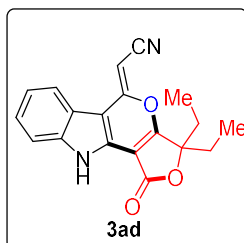

The title compound was prepared from **1a** (55 mg, 0.3 mmol) and **2d** (55 mg, 0.3 mmol) according to general procedure A. Purification using column chromatography ( $R_f$  = 0.52, SiO<sub>2</sub>, EtOAc:Hexane, 14:86) gave pure product as a pale yellow solid (68.8 mg, 72% yield), mp 179-184 °C. <sup>1</sup>H NMR (400 MHz, CDCl<sub>3</sub>) δ 9.97 (s, 1H), 7.65 (d,  $J$  = 7.5 Hz, 1H),



7.57 (d,  $J = 7.4$  Hz, 1H), 7.41 (tt,  $J = 7.3, 6.1$  Hz, 2H), 4.98 (s, 1H), 2.12 (qd,  $J = 7.4, 2.4$  Hz, 4H), 0.95 (t,  $J = 7.4$  Hz, 6H).  $^{13}\text{C}$  NMR (100 MHz,  $\text{CDCl}_3$ )  $\delta$  176.0, 166.2, 163.2, 137.7, 130.0, 125.5, 123.5, 121.7, 119.6, 113.0, 102.5, 100.2, 90.0, 7.7, 29.2, 7.7. HRMS (ESI) calcd for  $\text{C}_{19}\text{H}_{17}\text{N}_2\text{O}_3$   $[\text{M}+\text{H}]^+$  321.1233, found 321.1227.

**(Z)-2-(3-ethyl-1-oxo-3-vinyl-3,10-dihydrofuro[3',4':5,6]pyrano[4,3-b]indol-5(1H)-ylidene)acetonitrile (3ae):**

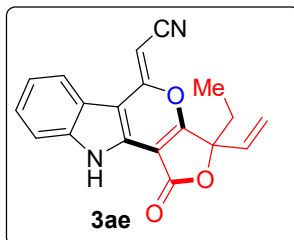

The title compound was prepared from **1a** (55 mg, 0.3 mmol) and **2e** (54.6 mg, 0.3 mmol) according to general procedure A. Purification using column chromatography ( $R_f = 0.51$ ,  $\text{SiO}_2$ , EtOAc:Hexane, 13:87) gave pure product as a off-white solid (64.6 mg, 68% yield), mp 186-189 °C.  $^1\text{H}$  NMR (400 MHz,  $\text{CDCl}_3$ )  $\delta$  9.98 (s, 1H), 7.64 (d,  $J = 7.7$  Hz, 1H), 7.58 (d,  $J = 7.8$  Hz, 1H), 7.46 – 7.36 (m, 2H), 6.10 (dd,  $J = 17.2, 10.9$  Hz, 1H), 5.64 (d,  $J = 17.2$  Hz, 1H), 5.44 (d,  $J = 10.9$  Hz, 1H), 4.99 (s, 1H), 2.25 – 2.07 (m, 2H), 1.01 (t,  $J = 7.3$  Hz, 3H).  $^{13}\text{C}$  NMR (100 MHz,  $\text{CDCl}_3$ )  $\delta$  175.3, 165.8, 163.1, 137.7, 132.6, 130.0, 125.5, 123.5, 119.6, 118.7, 112.9, 102.7, 98.6, 88.3, 67.0, 29.9, 7.7. HRMS (ESI) calcd for  $\text{C}_{19}\text{H}_{13}\text{N}_2\text{O}_3$   $[\text{M}-\text{H}]^-$  317.0920, found 317.0928.

**(Z)-2-(3-isopropyl-3-methyl-1-oxo-3,10-dihydrofuro[3',4':5,6]pyrano[4,3-b]indol-5(1H)-ylidene)acetonitrile (3af):**

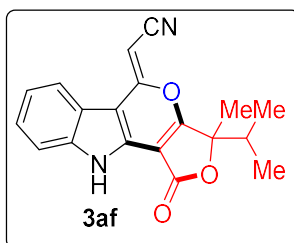

The title compound was prepared from **1a** (55 mg, 0.3 mmol) and **2f** (55 mg, 0.3 mmol) according to general procedure A. Purification using column chromatography ( $R_f = 0.55$ ,  $\text{SiO}_2$ , EtOAc:Hexane, 14:86) gave pure product as a pale yellow solid (61.2 mg, 64% yield), mp 196-200 °C.  $^1\text{H}$  NMR (400 MHz,  $\text{CDCl}_3$ )  $\delta$  10.07 (s, 1H), 7.65 (d,  $J = 7.3$  Hz, 1H), 7.56 (d,  $J = 7.4$  Hz, 1H), 7.45 – 7.36 (m, 2H), 4.98 (s, 1H), 2.32 (dd,  $J = 13.7, 6.9$  Hz, 1H), 1.75 (s, 3H), 1.12 (d,  $J = 6.8$  Hz, 3H), 1.07 (d,  $J = 6.9$  Hz, 3H).  $^{13}\text{C}$  NMR (100 MHz,  $\text{CDCl}_3$ )  $\delta$  177.4, 166.1, 163.2, 137.8, 130.2, 125.4, 123.4, 121.7, 119.6, 113.0, 102.5, 99.1, 89.1, 66.7, 35.2, 21.4, 17.3, 16.9. HRMS (ESI) calcd for  $\text{C}_{19}\text{H}_{17}\text{O}_3\text{N}_2$   $[\text{M}+\text{H}]^+$  321.1233, found 321.1234.

**(Z)-2-(3-isobutyl-3-methyl-1-oxo-3,10-dihydrofuro[3',4':5,6]pyrano[4,3-b]indol-5(1H)-ylidene)acetonitrile (3ag):**

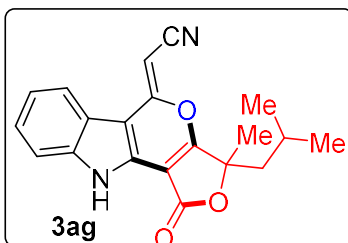

The title compound was prepared from **1a** (55 mg, 0.3 mmol) and **2g** (59.4 mg, 0.3 mmol) according to general procedure **A**. Purification using column chromatography ( $R_f = 0.55$ , SiO<sub>2</sub>, EtOAc:Hexane, 15:85) gave pure product as a white solid (67 mg, 67% yield), mp 190–193 °C. <sup>1</sup>H NMR (500 MHz, CDCl<sub>3</sub>) δ 9.84 (s, 1H), 7.66 (d,  $J = 7.7$  Hz, 1H), 7.55 (d,  $J = 7.5$  Hz, 1H), 7.43 – 7.39 (m, 2H), 4.99 (s, 1H), 2.11 – 2.07 (m, 1H), 1.90 – 1.85 (m, 2H), 1.75 (s, 3H), 0.99 (d,  $J = 6.7$  Hz, 3H), 0.90 (d,  $J = 6.6$  Hz, 3H). <sup>13</sup>C NMR (125 MHz, CDCl<sub>3</sub>) δ 177.5, 165.8, 163.0, 137.7, 130.2, 125.5, 123.5, 119.6, 116.6, 112.9, 102.6, 98.8, 86.5, 66.8, 45.7, 24.4, 24.2, 24.0, 23.3. HRMS (ESI) calcd for C<sub>20</sub>H<sub>17</sub>O<sub>3</sub>N<sub>2</sub> [M-H]<sup>-</sup> 333.1233, found 333.1241.

**(Z)-2-(1'-oxo-1'H-spiro[cycloheptane-1,3'-furo[3',4':5,6]pyrano[4,3-b]indol]-5'(10'H)-ylidene)acetonitrile (3ah):**

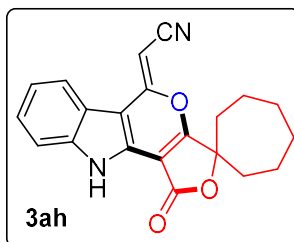

The title compound was prepared from **1a** (55 mg, 0.3 mmol) and **2h** (63 mg, 0.3 mmol) according to general procedure **A**. Purification using column chromatography ( $R_f = 0.50$  SiO<sub>2</sub>, EtOAc:Hexane, 16:84) gave pure product as a off-white solid (66.1 mg, 64% yield), mp 290–293 °C. <sup>1</sup>H NMR (500 MHz, DMSO) δ 12.89 (s, 1H), 7.92 (d,  $J = 6.3$  Hz, 1H), 7.60 (d,  $J = 6.6$  Hz, 1H), 7.33 (dd,  $J = 24.0, 6.6$  Hz, 2H), 5.42 (s, 1H), 2.11 (d,  $J = 12.7$  Hz, 4H), 1.75 (s, 4H), 1.68 (s, 4H). <sup>13</sup>C NMR (125 MHz, DMSO) δ 178.0, 164.5, 162.9, 138.2, 130.7, 124.6, 122.6, 121.3, 119.7, 117.5, 113.2, 101.3, 97.3, 9.7, 64.8, 36.5, 29.3, 22.3. HRMS (ESI) calcd for C<sub>21</sub>H<sub>19</sub>O<sub>3</sub>N<sub>2</sub> [M+H]<sup>+</sup> 347.1390, found 347.1382.

**(Z)-2-(1'-oxo-1'H-spiro[cyclooctane-1,3'-furo[3',4':5,6]pyrano[4,3-b]indol]-5'(10'H)-ylidene)acetonitrile (3ai):**

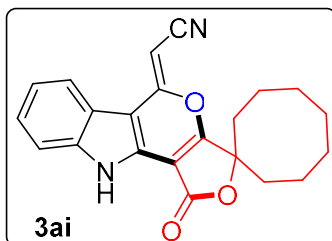

The title compound was prepared from **1a** (55 mg, 0.3 mmol) and **2i** (67.2 mg, 0.3 mmol) according to general procedure **A**. Purification using column chromatography ( $R_f = 0.50$ , SiO<sub>2</sub>, EtOAc:Hexane, 17:83) gave pure product as a white solid (66.7 mg, 62% yield), mp 288–292 °C. <sup>1</sup>H NMR (400 MHz, CDCl<sub>3</sub>) δ 9.90 (s, 1H), 7.64 (d,  $J = 7.3$  Hz, 1H), 7.55 (d,

$J = 7.5$  Hz, 1H), 7.42 – 7.37 (m, 2H), 4.97 (s, 2H), 2.22 – 2.10 (m, 4H), 1.96 (t,  $J = 14.1$  Hz, 2H), 1.87 – 1.78 (m, 8H).  $^{13}\text{C}$  NMR (100 MHz,  $\text{CDCl}_3$ )  $\delta$  179.1, 165.9, 163.3, 137.6, 130.5, 125.4, 123.4, 121.8, 119.6, 112.9, 102.6, 97.9, 89.3, 66.6, 33.3, 27.7, 24.8, 22.1. HRMS (ESI) calcd for  $\text{C}_{22}\text{H}_{19}\text{O}_3\text{N}_2$   $[\text{M}-\text{H}]^-$  359.1390, found 359.1395.

**(Z)-2-(1'-oxo-1'H-spiro[adamantane-2,3'-furo[3',4':5,6]pyrano[4,3-b]indol]-5'(10'H)-ylidene)acetonitrile (3aj):**

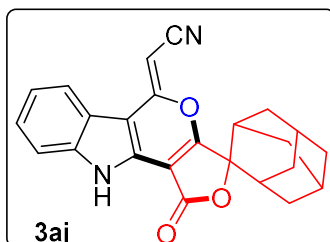

The title compound was prepared from **1a** (55 mg, 0.3 mmol) and **2j** (74.4 mg, 0.3 mmol) according to general procedure A. Purification using column chromatography ( $R_f = 0.50$ ,  $\text{SiO}_2$ , EtOAc:Hexane 16:84) gave pure product as a off-white solid (46 mg, 40% yield), mp 183-188 °C.  $^1\text{H}$  NMR (500 MHz,  $\text{CDCl}_3$ )  $\delta$  9.76 (s, 1H), 7.64 (d,  $J = 7.8$  Hz, 1H), 7.54 (d,  $J = 7.8$  Hz, 1H), 7.42 – 7.38 (m, 2H), 4.94 (s, 1H), 2.65 (d,  $J = 13.1$  Hz, 2H), 2.36 (d,  $J = 12.6$  Hz, 2H), 2.15 (d,  $J = 23.2$  Hz, 2H), 1.98 (d,  $J = 14.1$  Hz, 2H), 1.87 – 1.79 (m, 6H).  $^{13}\text{C}$  NMR (100 MHz,  $\text{CDCl}_3$ )  $\delta$  177.9, 165.6, 163.7, 137.6, 130.7, 125.5, 123.4, 119.7, 117.2, 112.8, 102.6, 98.7, 90.8, 66.4, 37.5, 36.8, 34.3, 33.6, 29.9, 26.5, 26.1. HRMS (ESI) calcd for  $\text{C}_{24}\text{H}_{19}\text{O}_3\text{N}_2$   $[\text{M}-\text{H}]^-$  383.1395, found 383.1398.

**(Z)-2-(3-methyl-1-oxo-3-phenyl-3,10-dihydrofuro[3',4':5,6]pyrano[4,3-b]indol-5(1H)-ylidene)acetonitrile (3ak):**

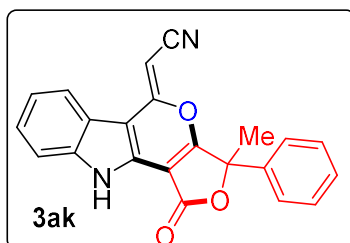

The title compound was prepared from **1a** (55 mg, 0.3 mmol) and **2k** (65.4 mg, 0.3 mmol) according to general procedure A. Purification using column chromatography ( $R_f = 0.55$ ,  $\text{SiO}_2$ , EtOAc:Hexane, 16:84) gave pure product as a pale yellow solid (65.6 mg, 62 % yield), mp 294-297 °C.  $^1\text{H}$  NMR (400 MHz, DMSO)  $\delta$  13.00 (s, 1H), 7.92 (d,  $J = 4.6$  Hz, 1H), 7.58 (s, 3H), 7.48 (d,  $J = 4.3$  Hz, 3H), 7.34 (d,  $J = 26.4$  Hz, 2H), 5.45 (s, 1H), 2.08 (s, 3H).  $^{13}\text{C}$  NMR (100 MHz, DMSO)  $\delta$  175.3, 164.4, 162.7, 138.4, 136.9, 130.3, 129.4, 129.3, 125.2, 124.8, 122.7, 121.2, 119.8, 117.3, 113.3, 101.5, 98.2, 84.8, 65.2, 24.0. HRMS (ESI) calcd for  $\text{C}_{22}\text{H}_{13}\text{O}_3\text{N}_2$   $[\text{M}-\text{H}]^-$  353.0921, found 353.0929.

**(Z)-2-(3-methyl-1-oxo-3-(p-tolyl)-3,10-dihydrofuro[3',4':5,6]pyrano[4,3-b]indol-5(1H)-ylidene)acetonitrile (3al):**

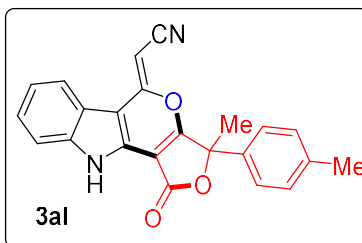

The title compound was prepared from **1a** (55 mg, 0.3 mmol) and **2l** (69.6 mg, 0.3 mmol) according to general procedure A. Purification using column chromatography ( $R_f$  = 0.50, SiO<sub>2</sub>, EtOAc:Hexane, 15:85) gave pure product as a sticky solid (60.5 mg, 55% yield). <sup>1</sup>H NMR (400 MHz, DMSO)  $\delta$  12.99 (s, 1H), 7.92 (d,  $J$  = 7.9 Hz, 1H), 7.62 (d,  $J$  = 8.1 Hz, 1H), 7.44 (d,  $J$  = 8.2 Hz, 2H), 7.38 (t,  $J$  = 7.6 Hz, 1H), 7.30 (t,  $J$  = 8.8 Hz, 3H), 5.44 (s, 1H), 2.32 (s, 3H), 2.06 (s, 3H). <sup>13</sup>C NMR (100 MHz, DMSO)  $\delta$  175.5, 164.5, 162.7, 139.1, 138.4, 133.8, 129.8, 125.2, 124.8, 122.7, 121.2, 119.8, 117.3, 113.3, 101.4, 98.1, 84.8, 65.2, 23.7, 20.7. HRMS (ESI) calcd for C<sub>23</sub>H<sub>15</sub>O<sub>3</sub>N<sub>2</sub> [M-H]<sup>-</sup> 367.1077, found 367.1086.

**(Z)-2-(3-(4-isopropylphenyl)-3-methyl-1-oxo-3,10-dihydrofuro[3',4':5,6]pyrano[4,3-b]indol-5(1H)-ylidene)acetonitrile (3am):**

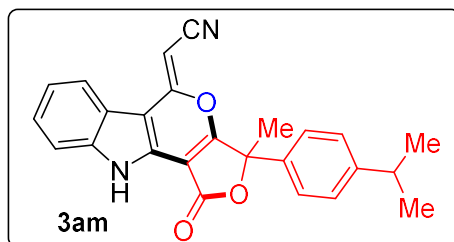

The title compound was prepared from **1a** (55 mg, 0.3 mmol) and **2m** (78 mg, 0.3 mmol) according to general procedure A. Purification using column chromatography ( $R_f$  = 0.53, SiO<sub>2</sub>, EtOAc:Hexane, 16:84) gave pure product as a pale yellow gel 55.6 mg, 47% yield). <sup>1</sup>H NMR (400 MHz, DMSO)  $\delta$  12.99 (s, 1H), 7.93 (d,  $J$  = 7.8 Hz, 1H), 7.62 (d,  $J$  = 8.0 Hz, 1H), 7.48 (d,  $J$  = 8.3 Hz, 2H), 7.37 (d,  $J$  = 5.4 Hz, 2H), 7.32 (d,  $J$  = 7.8 Hz, 2H), 5.45 (s, 1H), 2.93 – 2.89 (m, 1H), 2.06 (s, 3H), 1.20 (s, 3H), 1.18 (s, 3H). <sup>13</sup>C NMR (100 MHz, DMSO)  $\delta$  175.4, 164.4, 162.7, 149.8, 138.4, 134.3, 130.3, 127.2, 125.2, 124.8, 122.7, 119.8, 113.3, 101.5, 98.2, 84.9, 65.2, 33.2, 24.0, 23.8, 23.8. HRMS (ESI) calcd for C<sub>25</sub>H<sub>19</sub>O<sub>3</sub>N<sub>2</sub> [M-H]<sup>-</sup> 395.1390, found 395.1399.

**(Z)-2-(3-(4-bromophenyl)-3-methyl-1-oxo-3,10-dihydrofuro[3',4':5,6]pyrano[4,3-b]indol-5(1H)-ylidene)acetonitrile (3an):**

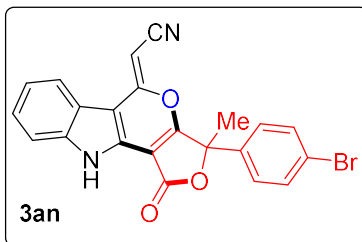

The title compound was prepared from **1a** (55 mg, 0.3 mmol) and **2n** (88.8 mg, 0.3 mmol) according to general procedure A. Purification using column chromatography ( $R_f$  = 0.50, SiO<sub>2</sub>, EtOAc:Hexane, 16:84) gave pure product as a yellowish gel (58 mg, 45% yield).

$^1\text{H}$  NMR (400 MHz, DMSO)  $\delta$  13.01 (s, 1H), 7.93 (d,  $J$  = 7.4 Hz, 1H), 7.69 (d,  $J$  = 8.0 Hz, 2H), 7.62 (d,  $J$  = 8.2 Hz, 1H), 7.53 (d,  $J$  = 8.1 Hz, 2H), 7.40 – 7.35 (m, 1H), 7.33 – 7.28 (m, 1H), 5.45 (s, 1H), 2.07 (s, 3H).  $^{13}\text{C}$  NMR (100 MHz, DMSO)  $\delta$  174.8, 164.3, 162.7, 138.4, 136.2, 132.2, 127.6, 124.8, 122.9, 122.8, 121.2, 119.8, 117.3, 113.3, 101.5, 98.4, 84.3, 65.3, 23.7. HRMS (ESI) calcd for  $\text{C}_{22}\text{H}_{12}\text{O}_3\text{N}_2\text{Br}$   $[\text{M}-\text{H}]^-$  431.0025, found 431.0037.

**(Z)-2-(3-methyl-1-oxo-3-phenethyl-3,10-dihydrofuro[3',4':5,6]pyrano[4,3-b]indol-5(1H)-ylidene)acetonitrile (3ao):**

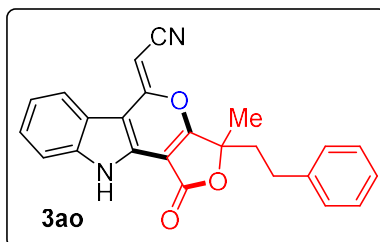

The title compound was prepared from **1a** (55 mg, 0.3 mmol) and **2o** (73.8 mg, 0.3 mmol) according to general procedure A. Purification using column chromatography ( $R_f$  = 0.50,  $\text{SiO}_2$ , EtOAc:Hexane, 17:83) gave pure product as a yellow solid (66.2 mg, 58% yield), mp 234-238 °C.  $^1\text{H}$  NMR (400 MHz,  $\text{CDCl}_3$ )  $\delta$  9.76 (s, 1H), 7.60 (dd,  $J$  = 11.7, 8.0 Hz, 2H), 7.45 – 7.36 (m, 2H), 7.13 (q,  $J$  = 7.4 Hz, 4H), 7.01 (t,  $J$  = 6.6 Hz, 1H), 4.90 (s, 1H), 2.86 – 2.80 (m, 1H), 2.64 – 2.55 (m, 1H), 2.44 (t,  $J$  = 7.6 Hz, 2H), 1.79 (s, 3H).  $^{13}\text{C}$  NMR (100 MHz,  $\text{CDCl}_3$ )  $\delta$  176.6, 165.8, 162.9, 139.4, 137.6, 130.0, 128.6, 128.4, 126.4, 125.4, 123.4, 121.7, 119.6, 112.9, 102.7, 99.2, 85.8, 66.8, 38.4, 29.8, 24.0. HRMS (ESI) calcd for  $\text{C}_{24}\text{H}_{19}\text{O}_3\text{N}_2$   $[\text{M}+\text{H}]^+$  383.1390, found 383.1385.

**(Z)-2-(3-methyl-3-(naphthalen-1-yl)-1-oxo-3,10-dihydrofuro[3',4':5,6]pyrano[4,3-b]indol-5(1H)-ylidene)acetonitrile (3ap):**

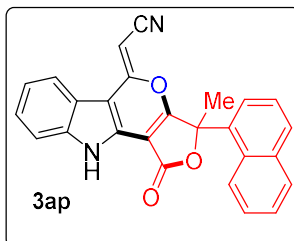

The title compound was prepared from **1a** (55 mg, 0.3 mmol) and **2p** (80.4 mg, 0.3 mmol) according to general procedure A. Purification using column chromatography ( $R_f$  = 0.55,  $\text{SiO}_2$ , EtOAc:Hexane, 18:82) gave pure product as a pale yellow gum (50.7, 42% yield).  $^1\text{H}$  NMR (500 MHz, DMSO)  $\delta$  8.53 (d,  $J$  = 8.6 Hz, 1H), 8.04 (d,  $J$  = 7.4 Hz, 2H), 8.00 (d,  $J$  = 7.9 Hz, 1H), 7.71 (d,  $J$  = 6.4 Hz, 2H), 7.63 (d,  $J$  = 7.8 Hz, 2H), 7.54 (t,  $J$  = 7.8 Hz, 1H), 7.40 (t,  $J$  = 7.5 Hz, 1H), 7.34 (t,  $J$  = 7.5 Hz, 1H), 5.56 (s, 1H), 2.31 (s, 3H).  $^{13}\text{C}$  NMR (125 MHz, DMSO)  $\delta$  175.0, 164.1, 162.8, 138.4, 134.5, 133.0, 130.6, 130.2, 129.6, 129.4, 127.1, 126.2, 125.6, 125.1, 124.9, 124.0, 122.8, 121.2, 119.9, 117.5, 113.3, 101.8, 99.7, 87.1, 65.5, 25.6. HRMS (ESI) calcd for  $\text{C}_{26}\text{H}_{17}\text{O}_3\text{N}_2$   $[\text{M}+\text{H}]^+$  405.1233, found 405.1225.

**(Z)-2-(1-oxo-3',4'-dihydro-1H,2'H-spiro[furo[3',4':5,6]pyrano[4,3-b]indole-3,1'-naphthalen]-5(10H)-ylidene)acetonitrile (3aq):**

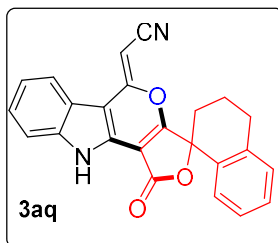

The title compound was prepared from **1a** (55 mg, 0.3 mmol) and **2q** (73.2 mg, 0.3 mmol) according to general procedure A. Purification using column chromatography ( $R_f$ = 0.50, SiO<sub>2</sub>, EtOAc:Hexane, 17:83) gave pure product as a colourless solid (54.5 mg, 48% yield). mp 278-283 °C. <sup>1</sup>H NMR (500 MHz, CDCl<sub>3</sub>) δ 10.17 (s, 1H), 7.64 (d,  $J$  = 7.4 Hz, 1H), 7.60 (d,  $J$  = 7.5 Hz, 1H), 7.44 – 7.39 (m, 2H), 7.36 – 7.31 (m, 1H), 7.26 (s, 1H), 7.19 – 7.15 (m, 1H), 7.01 (d,  $J$  = 7.3 Hz, 1H), 4.94 (s, 1H), 3.01 (t,  $J$  = 18.0 Hz, 2H), 2.54 – 2.45 (m, 1H), 2.38 – 2.25 (m, 2H), 2.20 (d,  $J$  = 13.7 Hz, 1H). <sup>13</sup>C NMR (125 MHz, CDCl<sub>3</sub>) δ 176.9, 163.1, 139.0, 137.8, 130.4, 130.2, 129.2, 127.1, 126.4, 125.5, 123.5, 121.7, 119.6, 113.1, 102.9, 99.3, 85.5, 66.9, 33.6, 28.8, 19.3. HRMS (ESI) calcd for C<sub>24</sub>H<sub>17</sub>O<sub>3</sub>N<sub>2</sub> [M+H]<sup>+</sup>381.1234, found 381.1225.

**(Z)-2-(3-(furan-2-yl)-3-methyl-1-oxo-3,10-dihydrofuro[3',4':5,6]pyrano[4,3-b]indol-5(1H)-ylidene)acetonitrile (3ar):**

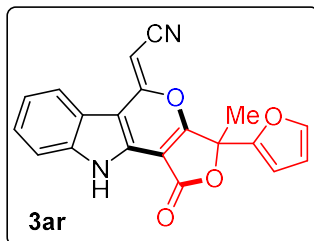

The title compound was prepared from **1a** (55 mg, 0.3 mmol) and **2r** (62.4 mg, 0.3 mmol) according to general procedure A. Purification using column chromatography ( $R_f$ = 0.60, SiO<sub>2</sub>, EtOAc:Hexane, 18:82) gave pure product as a yellow gum (57.6 mg, 56% yield). <sup>1</sup>H NMR (400 MHz, DMSO) δ 13.05 (s, 1H), 7.95 (d,  $J$  = 7.4 Hz, 1H), 7.78 (s, 1H), 7.64 (d,  $J$  = 7.5 Hz, 1H), 7.42 – 7.37 (m, 1H), 7.36 – 7.31 (m, 1H), 6.92 (s, 1H), 6.59 (s, 1H), 5.46 (s, 1H), 2.08 (s, 3H). <sup>13</sup>C NMR (100 MHz, DMSO) δ 172.8, 164.1, 162.6, 147.8, 145.1, 138.4, 129.9, 124.9, 122.8, 121.2, 119.9, 117.2, 113.4, 111.5, 111.3, 101.8, 99.5, 80.3, 65.4, 20.7. HRMS (ESI) calcd for C<sub>20</sub>H<sub>11</sub>O<sub>4</sub>N<sub>2</sub> [M-H]<sup>-</sup>343.0713, found 343.0721.

**(Z)-2-(1-oxo-3,3-diphenyl-3,10-dihydrofuro[3',4':5,6]pyrano[4,3-b]indol-5(1H)-ylidene)acetonitrile (3as):**

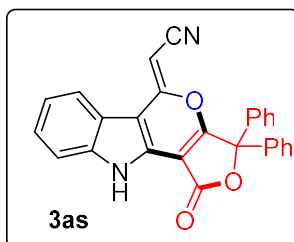

The title compound was prepared from **1a** (55 mg, 0.3 mmol) and **2s** (84 mg, 0.3 mmol) according to general procedure A. Purification using column chromatography ( $R_f$ =

0.60, SiO<sub>2</sub>, EtOAc:Hexane, 18:82) gave pure product as a pale yellow gum (54.7 mg, 44% yield). <sup>1</sup>H NMR (400 MHz, DMSO) δ 13.05 (s, 1H), 7.93 (d, *J* = 7.9 Hz, 1H), 7.62 (d, *J* = 8.1 Hz, 1H), 7.51 (d, *J* = 2.4 Hz, 2H), 7.49 (s, 4H), 7.48 (s, 3H), 7.45 (d, *J* = 1.9 Hz, 1H), 7.37 (t, *J* = 7.4 Hz, 1H), 7.30 (t, *J* = 7.4 Hz, 1H), 5.49 (s, 1H). <sup>13</sup>C NMR (100 MHz, DMSO) δ 172.8, 164.0, 162.8, 138.5, 137.0, 129.7, 129.2, 126.6, 124.9, 122.8, 121.2, 119.8, 117.3, 113.3, 101.7, 99.5, 88.1, 65.7. HRMS (ESI) calcd for C<sub>27</sub>H<sub>15</sub>O<sub>3</sub>N<sub>2</sub> [M-H]<sup>-</sup> 415.1077, found 415.1086.

**(Z)-2-((1R)-1,7,7-trimethyl-1'-oxo-1'H-spiro[bicyclo[2.2.1]heptane-2,3'furo[3',4':5,6]pyrano[4,3-b]indol]-5'(10'H)-ylidene)acetonitrile (3at):**

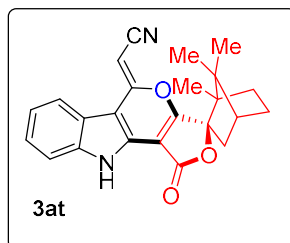

The title compound was prepared from **1a** (55 mg, 0.3 mmol) and **2t** (75 mg, 0.3 mmol) according to general procedure A. Purification using column chromatography (*R<sub>f</sub>* = 0.50, SiO<sub>2</sub>, EtOAc:Hexane, 15:85) gave pure product as a white solid (58.8 mg, 51% yield), mp 176-180 °C. <sup>1</sup>H NMR (400 MHz, CDCl<sub>3</sub>) δ 9.58 (s, 1H), 7.65 (d, *J* = 7.5 Hz, 1H), 7.55 (d, *J* = 7.5 Hz, 1H), 7.43 – 7.40 (m, 2H), 4.95 (s, 1H), 2.55 – 2.49 (m, 1H), 2.16 – 2.12 (m, 2H), 2.04 (t, *J* = 4.4 Hz, 1H), 1.72 – 1.66 (m, 2H), 1.26 (d, *J* = 5.6 Hz, 1H), 1.19 (s, 3H), 0.99 (s, 3H), 0.87 (s, 3H). <sup>13</sup>C NMR (100 MHz, CDCl<sub>3</sub>) δ 175.6, 165.9, 163.5, 137.6, 130.5, 125.5, 123.4, 121.7, 119.7, 116.9, 112.8, 102.5, 100.1, 95.0, 66.6, 56.0, 51.0, 45.4, 41.8, 29.0, 26.9, 20.6, 20.3, 10.4. HRMS (ESI) calcd for C<sub>24</sub>H<sub>23</sub>O<sub>3</sub>N<sub>2</sub> [M+H]<sup>+</sup> 387.1703 found 387.1697.

**(Z)-2-(2-isopropyl-5-methyl-1'-oxo-1'H-spiro[cyclohexane-1,3'furo[3',4':5,6]pyrano[4,3-b]indol]-5'(10'H)-ylidene)acetonitrile (3au):**

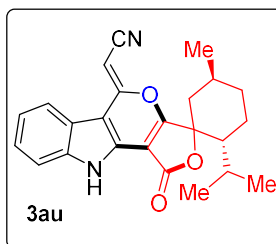

The title compound was prepared from **1a** (55 mg, 0.3 mmol) and **2u** (75.6 mg, 0.3 mmol) according to general procedure A. Purification using column chromatography (*R<sub>f</sub>* = 0.50, SiO<sub>2</sub>, EtOAc:Hexane, 16:84) gave pure product as a pale yellow solid (63.8 mg, 55% yield), mp 229-234 °C. <sup>1</sup>H NMR (400 MHz, CDCl<sub>3</sub>) δ 10.08 (s, 1H), 7.65 (d, *J* = 6.7 Hz, 1H), 7.60 (d, *J* = 6.7 Hz, 1H), 7.44 – 7.38 (m, 2H), 4.97 (s, 1H), 1.95 (d, *J* = 0.5 Hz, 3H), 1.82 – 1.73 (m, 3H), 1.35 – 1.23 (m, 2H), 1.17 (d, *J* = 12.2 Hz, 1H), 0.98 (d, *J* = 5.6 Hz, 3H), 0.90 (d, *J* = 6.4 Hz, 3H), 0.83 (d, *J* = 6.2 Hz, 3H). <sup>13</sup>C NMR (100 MHz, CDCl<sub>3</sub>) δ 177.9, 166.2, 163.1, 137.8, 130.3, 125.4, 123.4, 121.8, 119.6, 113.0, 102.6, 99.1, 90.1, 66.6, 46.6, 44.1, 33.9, 28.8, 28.2, 23.2, 22.2, 21.8, 18.6. HRMS (ESI) calcd for C<sub>24</sub>H<sub>25</sub>O<sub>3</sub>N<sub>2</sub> [M+H]<sup>+</sup> 389.1859, found 389.1855.

**(Z)-2-(3,3,7-trimethyl-1-oxo-3,10-dihydrofuro[3',4':5,6]pyrano[4,3-b]indol-5(1H)-ylidene)acetonitrile (3ba):**

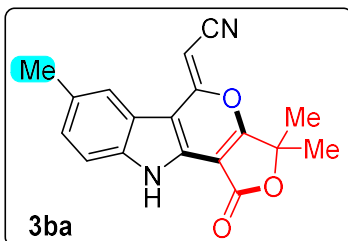

The title compound was prepared from **1b** (59 mg, 0.3 mmol) and **2a** (46.8 mg, 0.3 mmol) according to general procedure A. Purification using column chromatography ( $R_f$  = 0.55, SiO<sub>2</sub>, EtOAc:Hexane, 16:84) gave pure product as a pale brown solid (63 mg, 69% yield), mp 258-263 °C. <sup>1</sup>H NMR (500 MHz, DMSO) δ 12.79 (s, 1H), 7.75 (s, 1H), 7.48 (s, 1H), 7.19 (s, 1H), 5.41 (s, 1H), 2.45 (s, 3H), 1.67 (s, 6H). <sup>13</sup>C NMR (125 MHz, DMSO) δ 176.8, 164.4, 162.8, 136.5, 131.9, 130.4, 126.1, 121.5, 119.5, 117.5, 112.9, 101.0, 98.0, 82.7, 64.5, 24.0, 21.3. HRMS (ESI) calcd for C<sub>18</sub>H<sub>13</sub>N<sub>2</sub>O<sub>3</sub> [M-H]<sup>-</sup> 305.0920, found 305.0931.

**(Z)-2-(7-methoxy-3,3-dimethyl-1-oxo-3,10-dihydrofuro[3',4':5,6]pyrano[4,3-b]indol-5(1H)-ylidene)acetonitrile (3ca):**

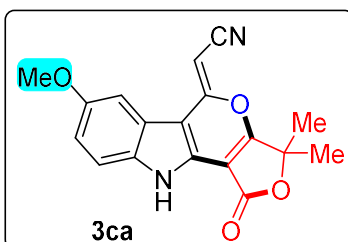

The title compound was prepared from **1c** (64 mg, 0.3 mmol) and **2a** (46.8 mg, 0.3 mmol) according to general procedure A. Purification using column chromatography ( $R_f$  = 0.60, SiO<sub>2</sub>, EtOAc:Hexane, 20:80) gave pure product as a pale brown solid (62.6 mg, 65% yield), mp 267-272 °C. <sup>1</sup>H NMR (400 MHz, DMSO) δ 12.77 (s, 1H), 7.49 (d,  $J$  = 8.6 Hz, 1H), 7.31 (s, 1H), 6.99 (d,  $J$  = 8.0 Hz, 1H), 5.47 (s, 1H), 3.85 (s, 3H), 1.67 (s, 6H). <sup>13</sup>C NMR (100 MHz, DMSO) δ 176.6, 164.4, 162.7, 156.0, 132.9, 130.5, 127.5, 122.0, 117.6, 114.3, 114.0, 101.9, 101.2, 97.9, 82.7, 64.9, 55.9, 24.0. HRMS (ESI) calcd for C<sub>18</sub>H<sub>13</sub>O<sub>4</sub>N<sub>2</sub> [M-H]<sup>-</sup> 321.0869, found 321.0879.

**(Z)-2-(7-(benzyloxy)-3,3-dimethyl-1-oxo-3,10-dihydrofuro[3',4':5,6]pyrano[4,3-b]indol-5(1H)-ylidene)acetonitrile (3da):**

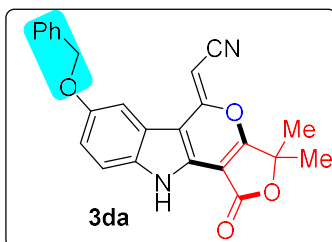

The title compound was prepared from **1d** (87 mg, 0.3 mmol) and **2a** (46.8 mg, 0.3 mmol) according to general procedure A. Purification using column chromatography ( $R_f$  = 0.6, SiO<sub>2</sub>, EtOAc:Hexane, 22:78) gave pure product as a white solid (69.2 mg, 58% yield),



mp 249-253 °C. <sup>1</sup>H NMR (500 MHz, DMSO) δ 12.78 (s, 1H), 7.50 (d, *J* = 6.3 Hz, 3H), 7.46 (s, 1H), 7.40 (t, *J* = 7.4 Hz, 2H), 7.33 (t, *J* = 7.1 Hz, 1H), 7.06 (d, *J* = 7.3 Hz, 1H), 5.48 (s, 1H), 5.19 (s, 2H), 1.67 (s, 6H). <sup>13</sup>C NMR (125 MHz, DMSO) δ 176.7, 164.4, 162.7, 155.0, 137.4, 133.1, 130.6, 128.5, 128.0, 122.0, 117.6, 114.9, 114.0, 103.3, 101.2, 97.9, 82.7, 70.1, 64.8, 24.0. HRMS (ESI) calcd for C<sub>24</sub>H<sub>17</sub>O<sub>4</sub>N<sub>2</sub> [M-H]<sup>-</sup>397.1182, found 397.1191.

**(Z)-2-(3,3,8-trimethyl-1-oxo-3,10-dihydrofuro[3',4':5,6]pyrano[4,3-b]indol-5(1H)-ylidene)acetonitrile (3ea):**

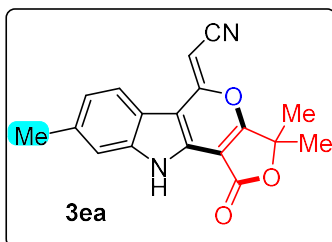

The title compound was prepared from **1e** (59 mg, 0.3 mmol) and **2a** (46.8 mg, 0.3 mmol) according to general procedure A. Purification using column chromatography (*R<sub>f</sub>* = 0.50, SiO<sub>2</sub>, EtOAc:Hexane, 18:82) gave pure product as a pale yellow solid (60 mg, 66% yield), mp 290-294 °C. <sup>1</sup>H NMR (400 MHz, DMSO) δ 12.78 (s, 1H), 7.81 (d, *J* = 7.3 Hz, 1H), 7.39 (s, 1H), 7.14 (d, *J* = 8.5 Hz, 1H), 5.37 (s, 1H), 2.44 (s, 3H), 1.67 (s, 6H). <sup>13</sup>C NMR (100 MHz, DMSO) δ 176.6, 164.4, 162.8, 138.7, 134.3, 130.2, 124.3, 119.4, 119.1, 117.5, 113.0, 101.4, 98.0, 82.7, 64.4, 24.0, 21.4. HRMS (ESI) calcd for C<sub>18</sub>H<sub>13</sub>O<sub>3</sub>N<sub>2</sub> [M-H]<sup>-</sup>305.0920, found 305.0927.

**(Z)-2-(8-methoxy-3,3-dimethyl-1-oxo-3,10-dihydrofuro[3',4':5,6]pyrano[4,3-b]indol-5(1H)-ylidene)acetonitrile (3fa):**

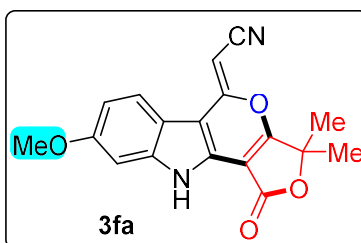

The title compound was prepared from **1f** (64 mg, 0.3 mmol) and **2a** (46.8 mg, 0.3 mmol) according to general procedure A. Purification using column chromatography (*R<sub>f</sub>* = 0.50, SiO<sub>2</sub>, EtOAc:Hexane, 21:79) gave pure product as off-white solid (53 mg, 55% yield), mp 282-288°C. <sup>1</sup>H NMR (500 MHz, DMSO) δ 12.72 (s, 1H), 7.80 (s, 1H), 7.07 (s, 1H), 6.92 (s, 1H), 5.33 (s, 1H), 3.81 (s, 3H), 1.67 (s, 6H). <sup>13</sup>C NMR (125 MHz, DMSO) δ 176.0, 164.4, 162.7, 157.5, 139.6, 129.8, 120.5, 117.6, 115.2, 112.1, 101.6, 98.7, 96.4, 82.7, 64.1, 55.5, 24.1. HRMS (ESI) calcd for C<sub>18</sub>H<sub>15</sub>O<sub>4</sub>N<sub>2</sub> [M+H]<sup>+</sup>323.1026, found 323.1015.

**(Z)-2-(3,3,9-trimethyl-1-oxo-3,10-dihydrofuro[3',4':5,6]pyrano[4,3-b]indol-5(1H)-ylidene)acetonitrile (3ga):**

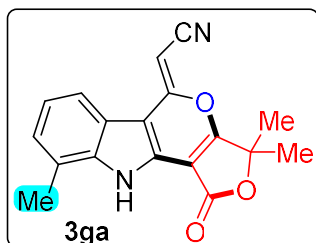

The title compound was prepared from **1g** (59 mg, 0.3 mmol) and **2a** (46.8 mg, 0.3 mmol) according to general procedure **A**. Purification using column chromatography ( $R_f$  = 0.55, SiO<sub>2</sub>, EtOAc:Hexane, 19:81) gave pure product as a white solid (47.4 mg, 52% yield), mp 288-293 °C. <sup>1</sup>H NMR (400 MHz, DMSO) δ 12.67 (s, 1H), 7.66 (d,  $J$  = 6.2 Hz, 1H), 7.17 – 7.06 (m, 2H), 5.34 (s, 1H), 2.42 (s, 3H), 1.59 (s, 6H). <sup>13</sup>C NMR (100 MHz, DMSO) δ 177.0, 164.3, 162.7, 137.6, 130.8, 125.7, 123.2, 122.9, 121.4, 117.5, 117.2, 101.9, 97.9, 82.3, 64.8, 24.1, 17.5. HRMS (ESI) calcd for C<sub>18</sub>H<sub>15</sub>O<sub>3</sub>N<sub>2</sub> [M+H]<sup>+</sup>307.1077, found 307.1068.

**(Z)-2-(3,3-dimethyl-1-oxo-3,12-dihydrobenzo[g]furo[3',4':5,6]pyrano[4,3-b]indol-5(1H)-ylidene)acetonitrile (3ga):**

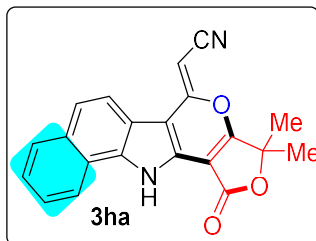

The title compound was prepared from **1h** (70 mg, 0.3 mmol) and **2a** (46.8 mg, 0.3 mmol) according to general procedure **A**. Purification using column chromatography ( $R_f$  = 0.50, SiO<sub>2</sub>, EtOAc:Hexane, 17:83) gave pure product as a sticky pale brown gel (41 mg, 40% yield). <sup>1</sup>H NMR (400 MHz, DMSO) δ 13.62 (s, 1H), 8.89 (d,  $J$  = 7.9 Hz, 1H), 8.05 (t,  $J$  = 8.3 Hz, 2H), 7.79 (d,  $J$  = 8.6 Hz, 1H), 7.64 (s, 1H), 7.57 (d,  $J$  = 7.5 Hz, 1H), 5.63 (s, 1H), 1.70 (s, 6H). <sup>13</sup>C NMR (100 MHz, DMSO) δ 176.1, 164.3, 162.8, 133.7, 130.8, 128.8, 128.6, 126.6, 125.6, 123.6, 122.2, 121.8, 118.5, 117.9, 103.2, 98.8, 82.4, 65.6, 24.1. HRMS (ESI) calcd for C<sub>21</sub>H<sub>15</sub>O<sub>3</sub>N<sub>2</sub> [M+H]<sup>+</sup>343.1077, found 343.1073.

**(Z)-2-(7-bromo-3,3-dimethyl-1-oxo-3,10-dihydrofuro[3',4':5,6]pyrano[4,3-b]indol-5(1H)-ylidene)acetonitrile (3ia):**

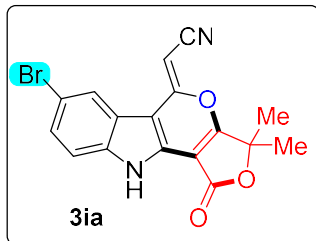

The title compound was prepared from **1i** (78 mg, 0.3 mmol) and **2a** (46.8 mg, 0.3 mmol) according to general procedure **A**. Purification using column chromatography ( $R_f$  = 0.6, SiO<sub>2</sub>, EtOAc:Hexane, 19:81) gave pure product as a white solid (55 mg, 50% yield), mp 304-307 °C. <sup>1</sup>H NMR (400 MHz, DMSO) δ 13.07 (s, 1H), 8.17 (s, 1H), 7.51 (d,  $J$  = 9.3 Hz, 2H), 5.58 (s, 1H), 1.67 (s, 6H). <sup>13</sup>C NMR (100 MHz, DMSO) δ 177.5, 164.2, 162.1, 137.0,

131.6, 127.3, 123.0, 121.9, 117.2, 115.5, 115.0, 100.8, 97.8, 82.8, 66.0, 24.0. HRMS (ESI) calcd for  $C_{17}H_{12}O_3N_2Br$   $[M+H]^+$  371.0025, found 371.0020.

**(Z)-2-(8-bromo-3,3-dimethyl-1-oxo-3,10-dihydrofuro[3',4':5,6]pyrano[4,3-b]indol-5(1H)-ylidene)acetonitrile (3ja):**

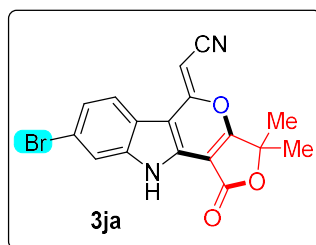

The title compound mixture was prepared from **1j** (78 mg, 0.3mmol) and **2a** (46.8 mg, 0.3 mmol) according to general procedure A. Purification using column chromatography ( $R_f = 0.55$ ,  $SiO_2$ , EtOAc:Hexane, 19:81) gave pure product as a pale yellow solid (49.6 mg, 45% yield), mp 297-300 °C.  $^1H$  NMR (400 MHz, DMSO)  $\delta$  13.03 (s, 1H), 7.91 (d,  $J = 8.6$  Hz, 1H), 7.73 (d,  $J = 1.5$  Hz, 1H), 7.43 (dd,  $J = 8.5, 1.6$  Hz, 1H), 5.47 (s, 1H), 1.68 (s, 6H).  $^{13}C$  NMR (100 MHz, DMSO)  $\delta$  177.4, 164.2, 162.3, 139.1, 131.4, 127.5, 125.4, 121.4, 120.4, 117.1, 117.0, 115.7, 114.0, 101.4, 97.9, 82.9, 65.7, 23.9. HRMS (ESI) calcd for  $C_{17}H_{10}O_3N_2Br$   $[M-H]^-$  368.9869, found 368.9876.

**Synthetic utility:**

**(Z)-2-(3,3-dimethyl-1-oxo-7-(p-tolyl)-3,10-dihydrofuro[3',4':5,6]pyrano[4,3-b]indol-5(1H)-ylidene)acetonitrile**

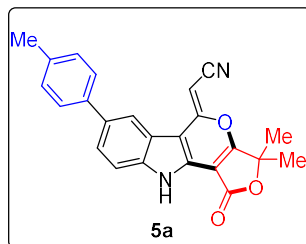

The bromo pyrano indole **3ia** (55 mg, 0.15 mmol) in  $H_2O$  (3 ml) was added p-tolylboronic acid (30 mg, 1.5 equiv),  $Pd(OAc)_2$  (1.7 mg, 5 mol%) DIPA (0.05 ml, 1.5 equiv) and the reaction mixture was stirred at reflux (oil bath). After completion (monitored by TLC) of the conversion, reaction mixture was quenched with  $H_2O$  and extracted with ethyl acetate. The combined organic layers were dried over anhydrous sodium sulphate, filtered and concentrated under reduced pressure and the product was purified through a short silica gel column using EtOAc:Hexane (15:85) as the eluent to get pure product as a yellow solid (44 mg, 78% yield), mp 290-293 °C.  $^1H$  NMR (400 MHz, DMSO)  $\delta$  12.94 (s, 1H), 8.08 (s, 1H), 7.70 (s, 2H), 7.65 (s, 2H), 7.28 (s, 2H), 5.65 (s, 1H), 2.35 (s, 3H), 1.68 (s, 6H).  $^{13}C$  NMR (100 MHz, DMSO)  $\delta$  177.1, 164.4, 162.5, 137.6, 136.4, 135.1, 131.0, 129.5, 127.1, 123.7, 122.0, 117.5, 117.0, 113.6, 101.5, 97.9, 82.8, 65.5, 24.0, 20.8. HRMS (ESI) calcd for  $C_{24}H_{19}O_3N_2$   $[M+H]^+$  383.1396, found 383.1388.

**(Z)-2-(3,3-dimethyl-1-oxo-8-(p-tolyl)-3,10-dihydrofuro[3',4':5,6]pyrano[4,3-b]indol-5(1H)-ylidene)acetonitrile**

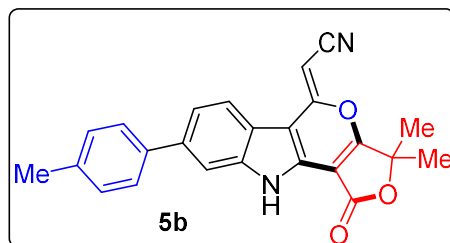

The bromo pyrano indole **3ja** (55 mg, 0.15 mmol) in H<sub>2</sub>O (3 ml) was added p-tolylboronic acid (30 mg, 1.5 equiv), Pd(OAc)<sub>2</sub> (1.7 mg, 5 mol%) DIPA (0.05 ml, 1.5 equiv) and the reaction mixture was stirred at reflux (oil bath). After completion (monitored by TLC) of the conversion, reaction mixture was quenched with H<sub>2</sub>O and extracted with ethyl acetate. The combined organic layers were dried over anhydrous sodium sulphate, filtered and concentrated under reduced pressure and the product was purified through a short silica gel column using EtOAc:Hexane (16:84) as the eluent to get the pure product as a yellow solid (39.7 mg, 70% yield), mp 300-305 °C. <sup>1</sup>H NMR (400 MHz, DMSO) δ 12.96 (s, 1H), 7.98 (s, 1H), 7.77 (s, 1H), 7.58 (s, 3H), 7.30 (s, 2H), 5.46 (s, 1H), 2.35 (s, 3H), 1.69 (s, 6H). <sup>13</sup>C NMR (101 MHz, DMSO) δ 177.01, 164.37, 162.63, 139.06, 137.45, 136.83, 131.14, 129.77, 126.82, 121.69, 120.41, 120.12, 117.45, 110.60, 101.38, 98.00, 82.80, 64.93, 24.03, 20.78. HRMS (ESI) calcd for C<sub>24</sub>H<sub>19</sub>O<sub>3</sub>N<sub>2</sub> [M+H]<sup>+</sup>383.1396, found 383.1388.

#### Scale-up Experiments:

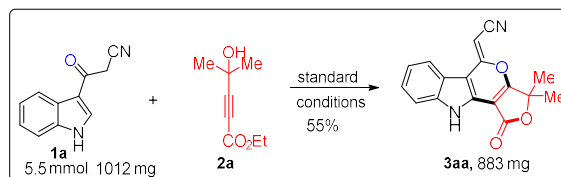

To a mixture of 3-(1H-indol-3-yl)-3-oxopropanenitrile **1a** (1012 mg, 5.5 mmol) and 4-hydroxyalkynoate derivative **2a** (858 mg, 5.5 mmol) in THF, [RhCp\*Cl<sub>2</sub>]<sub>2</sub> (102 mg, 3 mol %), Cu(OAc)<sub>2</sub>·H<sub>2</sub>O (2189 mg, 2 equiv), Cs<sub>2</sub>CO<sub>3</sub> (1788 mg, 1 equiv) were introduced and the reaction mixture was stirred at 80 °C (oil bath) for 8 hours under air balloon. After completion of reaction (monitored by TLC), THF was evaporated, water was added and the contents were extracted with ethyl acetate (2×10 mL). The organic layer was evaporated and the residue was purified by column chromatography (R<sub>f</sub>= 0.50) (SiO<sub>2</sub>, EtOAc:Hexane, 14:86) to get **3aa** in 55% (883 mg) yield.

#### Deuterium labelling studies:

An oven-dried reaction vessel was charged with [Cp\*RhCl<sub>2</sub>]<sub>2</sub> (5.6 mg, 3 mol%), Cu(OAc)<sub>2</sub>·H<sub>2</sub>O (119 mg, 2 equiv), Cs<sub>2</sub>CO<sub>3</sub> (97.5 mg, 1 equiv) 3-(1H-indol-3-yl)-3-oxopropanenitrile **1a** (55 mg, 0.3mmol), THF (0.5 ml), and CD<sub>3</sub>OD (10equiv) under Ar. The vessel was sealed and heated at 80 °C (oil bath) for 1 h. After removal of solvents, the residue was purified by flash column chromatography on silica gel (eluent: EtOAc/ petroleum ether = 32:68). **1a'** was recovered in 88% yield.

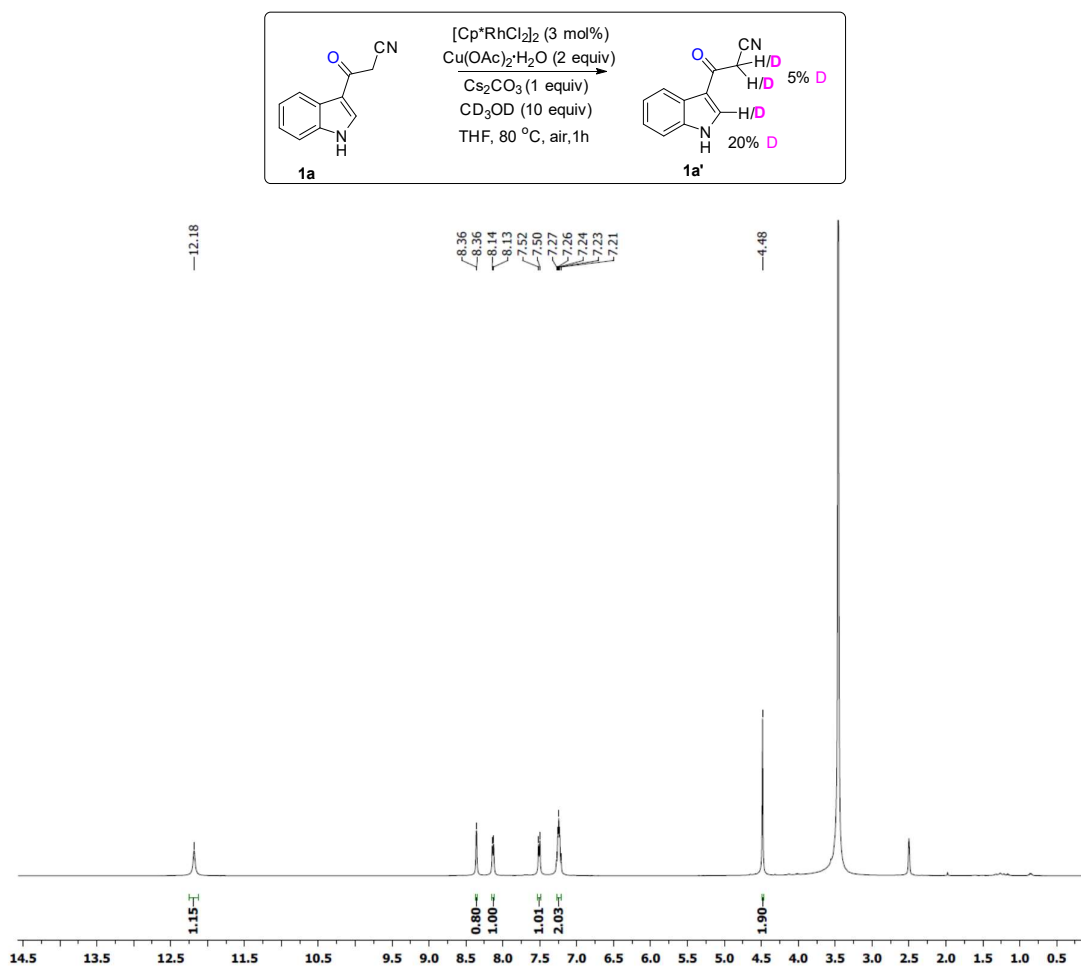

### KIE studies:

#### Preparation of indole-2-d and 3-(1H-indol-3-yl-2-d)-3-oxopropanenitrile(**1a-2D**)

indole-2-D is prepared according the literature procedure.<sup>7a</sup>

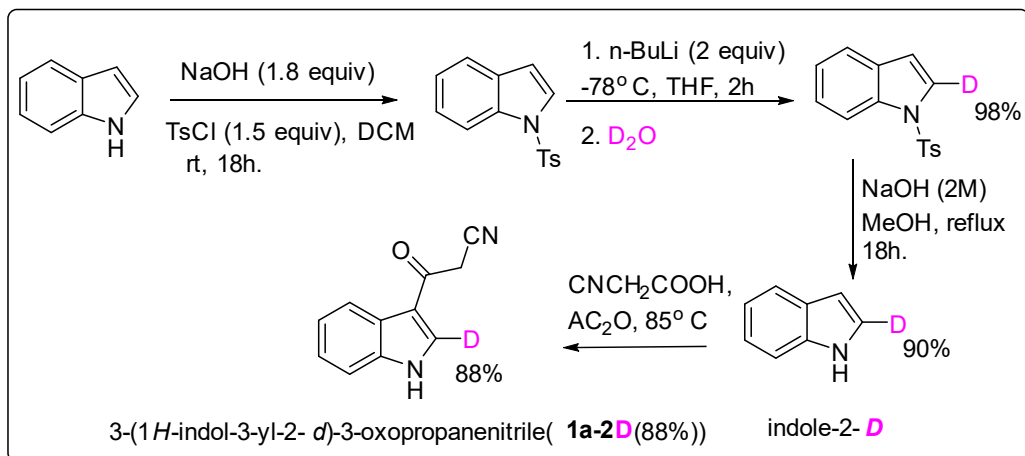

#### 3-(1H-indol-3-yl-2-d)-3-oxopropanenitrile(**1a-2d**):

$^1\text{H}$  NMR (400 MHz, DMSO)  $\delta$  12.21 (s, 1H), 8.36 (d,  $J = 3.2$  Hz, 0.12H), 8.15 – 8.11 (m, 1H), 7.51 (dd,  $J = 6.4, 1.9$  Hz, 1H), 7.28 – 7.20 (m, 2H), 4.48 (s, 2H).

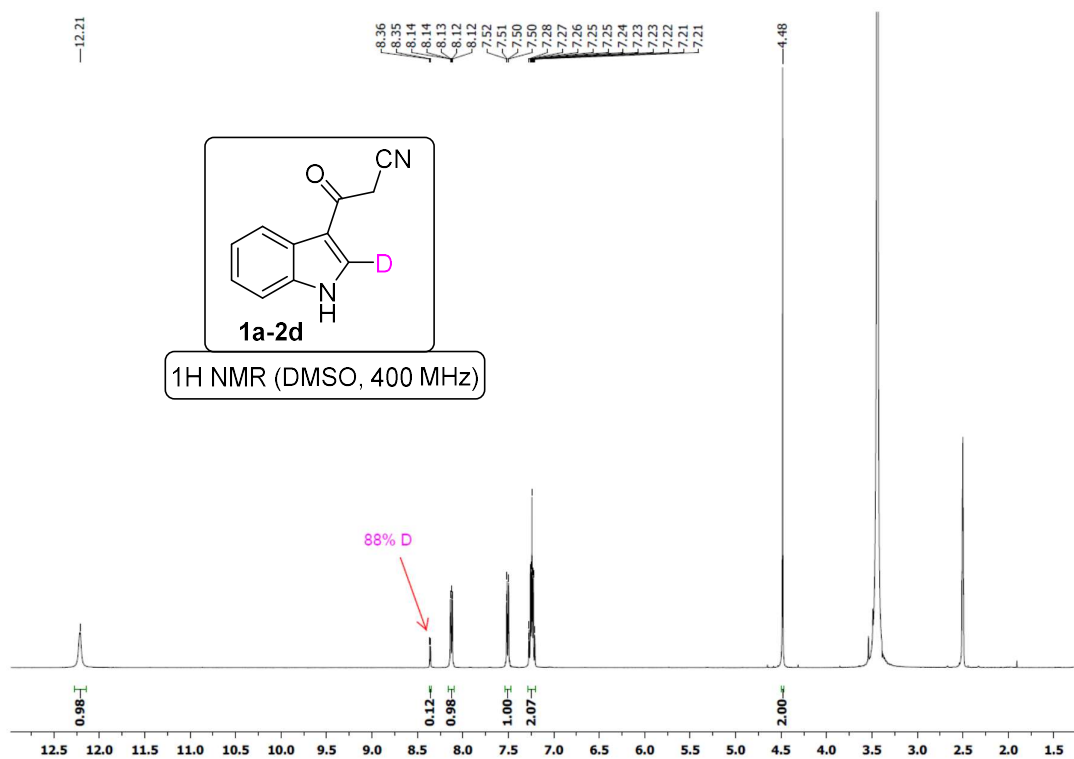

**Parallel experiments Study:**<sup>7b</sup>

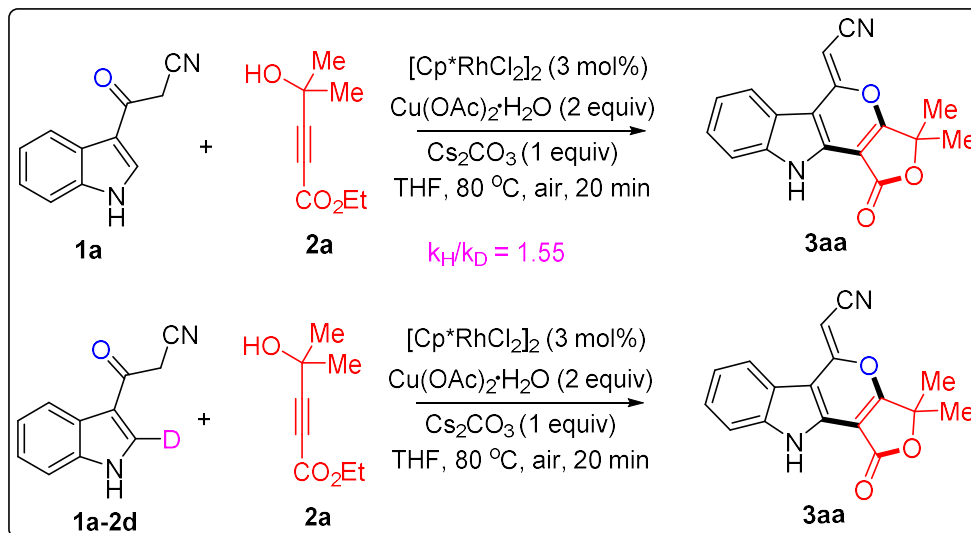

To a mixture of 3-(1H-indol-3-yl)-3-oxopropanenitrile **1a** (27.6 mg, 0.15 mmol) or **2d-1a** (27.5 mg, 0.15 mmol) and 4-hydroxyalkynoate derivative **2a** (23.5 mg, 0.15 mmol) in THF,  $[\text{RhCp}^*\text{Cl}_2]_2$  (2.8 mg, 3 mol %),  $\text{Cu}(\text{OAc})_2 \cdot \text{H}_2\text{O}$  (60 mg, 2 equiv),  $\text{Cs}_2\text{CO}_3$  (48.7 mg, 1 equiv) were introduced and the reaction mixtures were stirred at 80 °C (Pre-heated oil bath) for 20 minutes under air balloon. From the resulting solution of reaction mixture THF was evaporated. The  $^1\text{H}$  NMR yields of **3aa** for each reaction were given using 1,3,5-trimethoxybenzene as an internal standard. A KIE value of 1.55 was determined on the basis of the  $^1\text{H}$  NMR analysis.

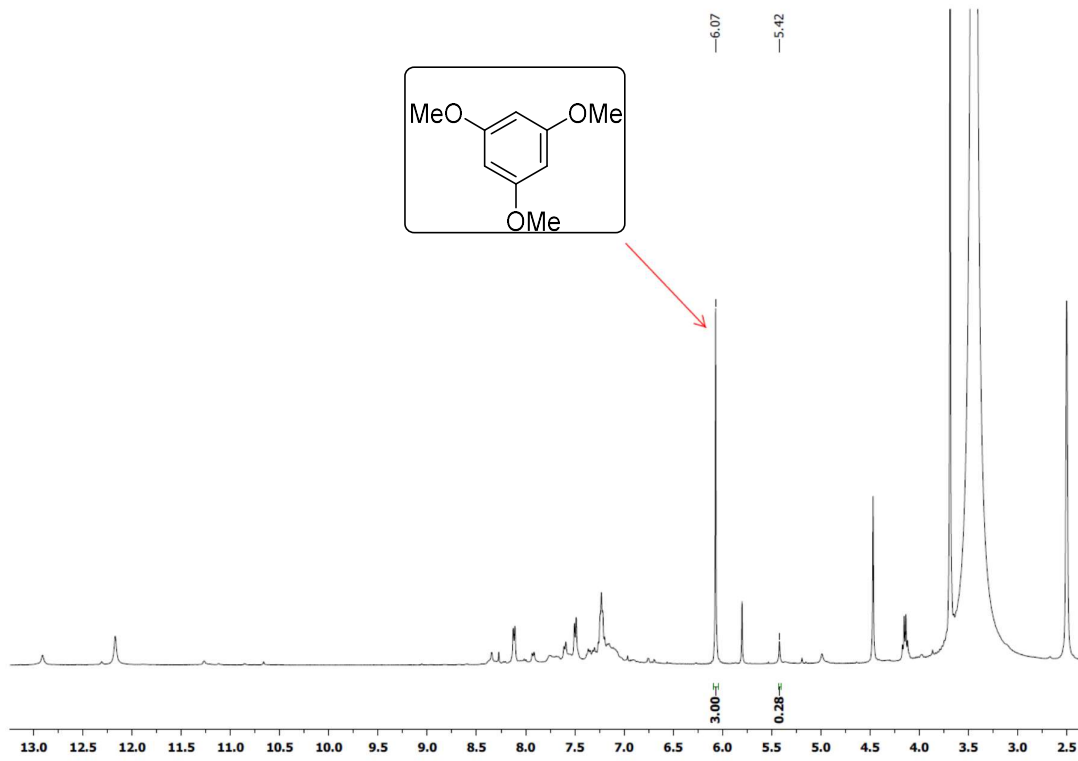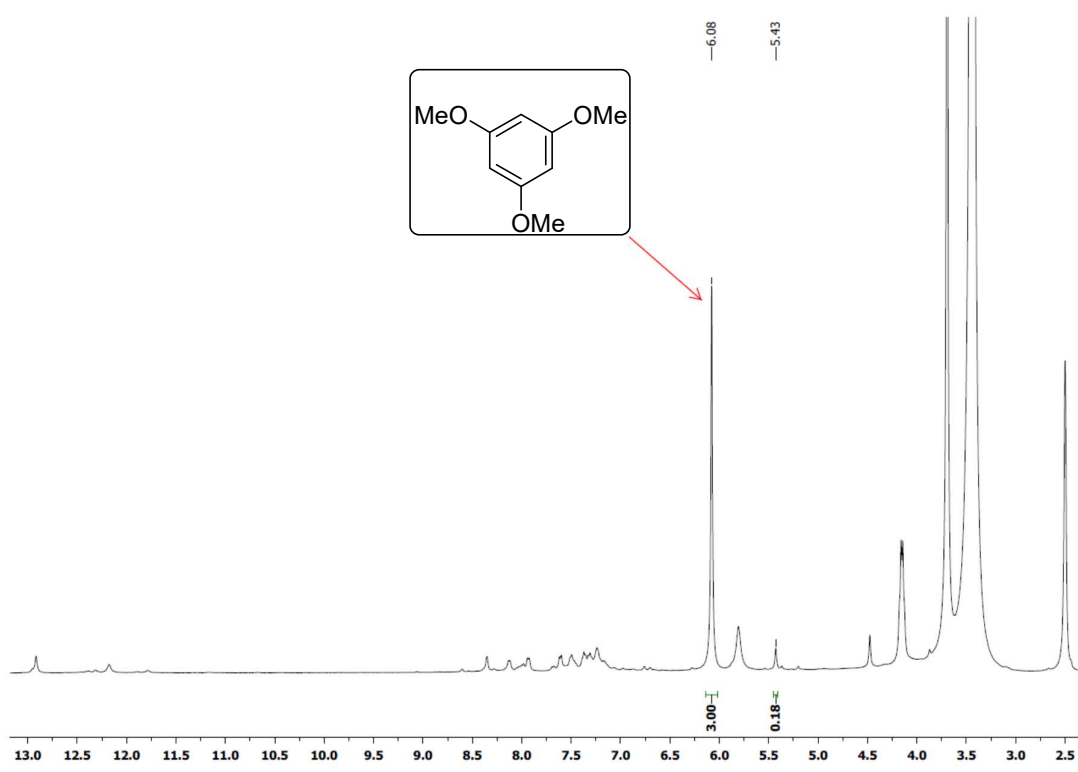

Combined experiments Study:<sup>7c</sup>



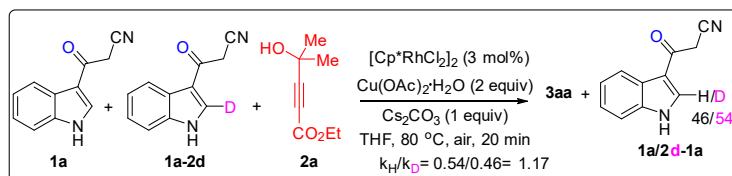

To an equimolar mixture of 3-(1H-indol-3-yl)-3-oxopropanenitrile **1a** (27.6 mg, 0.15 mmol) or **2d-1a** (27.5 mg, 0.15 mmol) and 4-hydroxyalkynoate derivative **2a** (23.5 mg, 0.15 mmol) in THF, [RhCp\*Cl<sub>2</sub>]<sub>2</sub> (2.8 mg, 3 mol %), Cu(OAc)<sub>2</sub>·H<sub>2</sub>O (60 mg, 2 equiv), Cs<sub>2</sub>CO<sub>3</sub> (48.7 mg, 1 equiv) were introduced and the reaction mixtures was stirred at 80 °C (Pre-heated oil bath) for 20 minutes under air balloon. From the resulting solution of reaction mixture THF was evaporated. Then the crude reaction mixture was directly subjected to column chromatography, and best of the recovered **1a/1a-2d** calculated the KIE. The observed KIE = 0.54/0.46 = (1.17), suggested initial rate of the reaction does not depend on the CH cleavage step.

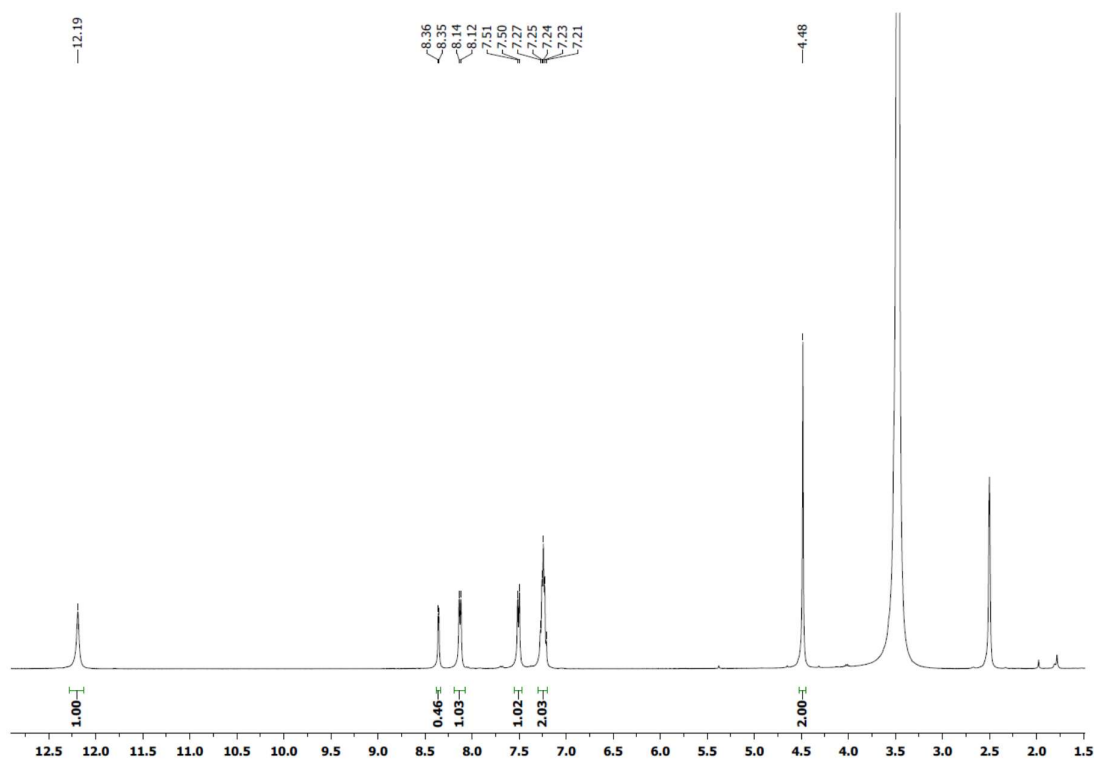

Copies of <sup>1</sup>H and <sup>13</sup>C NMR spectras:

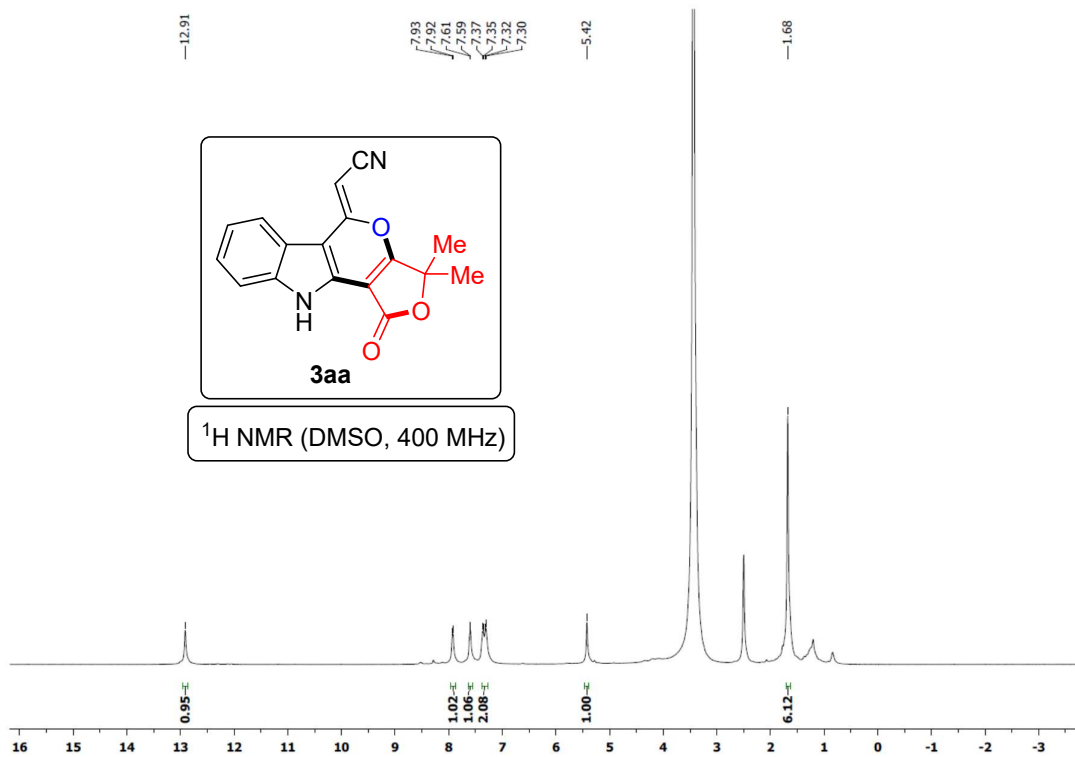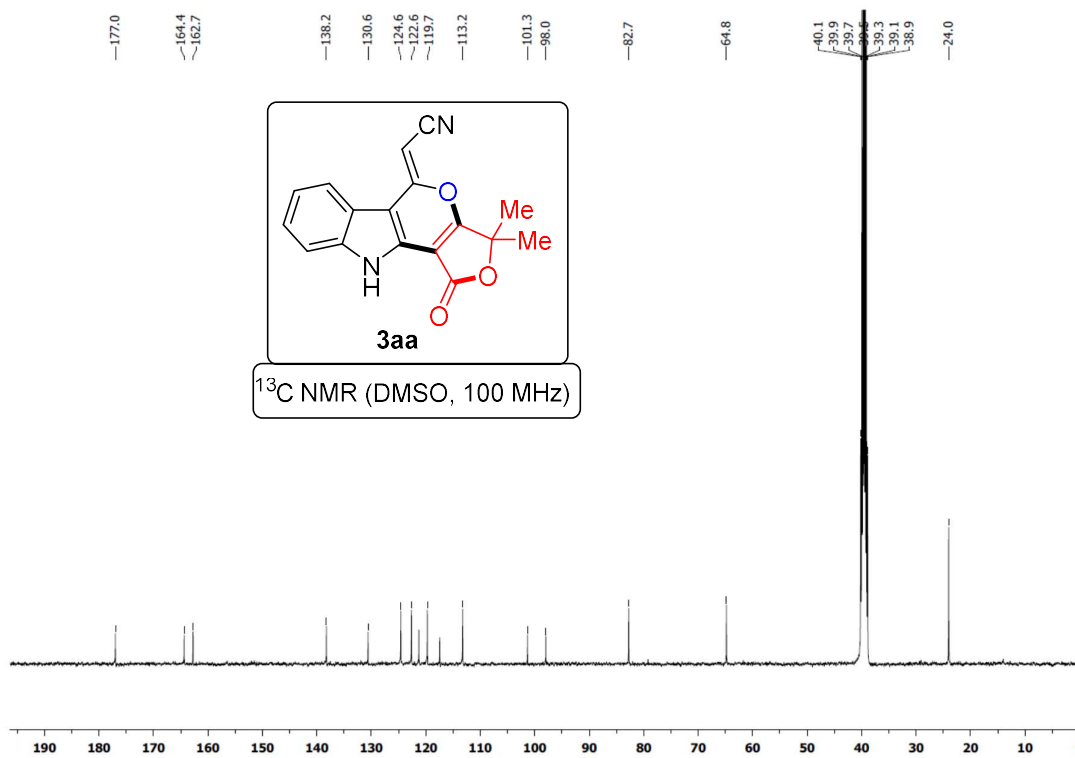

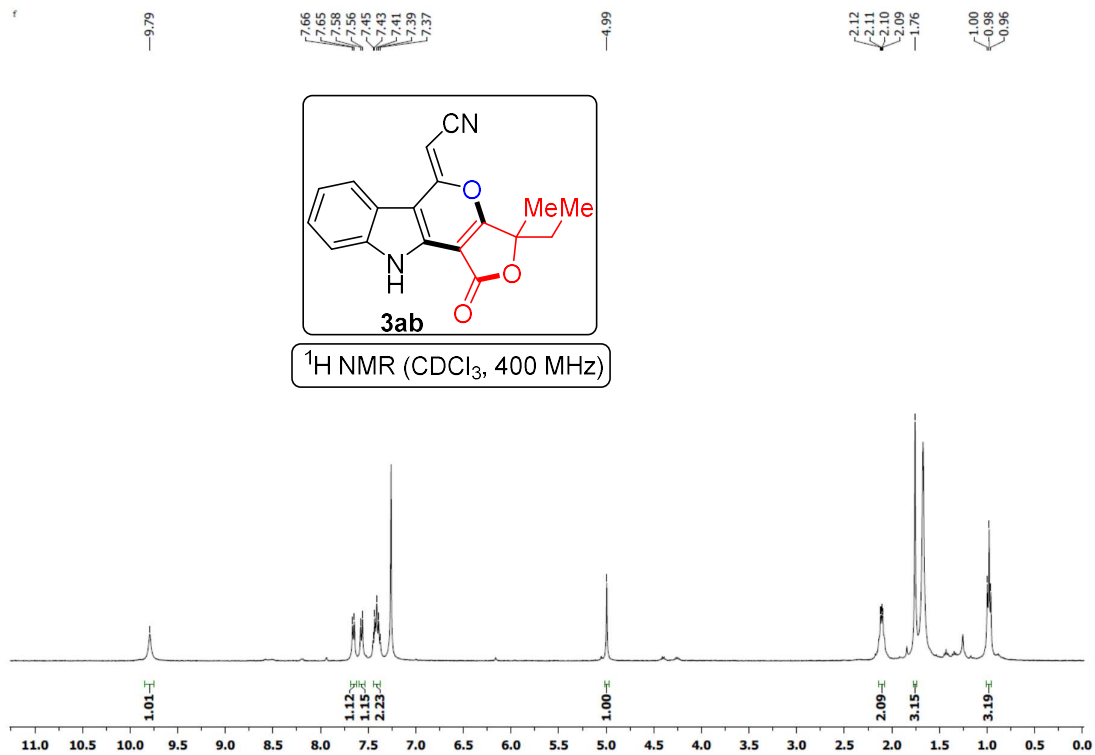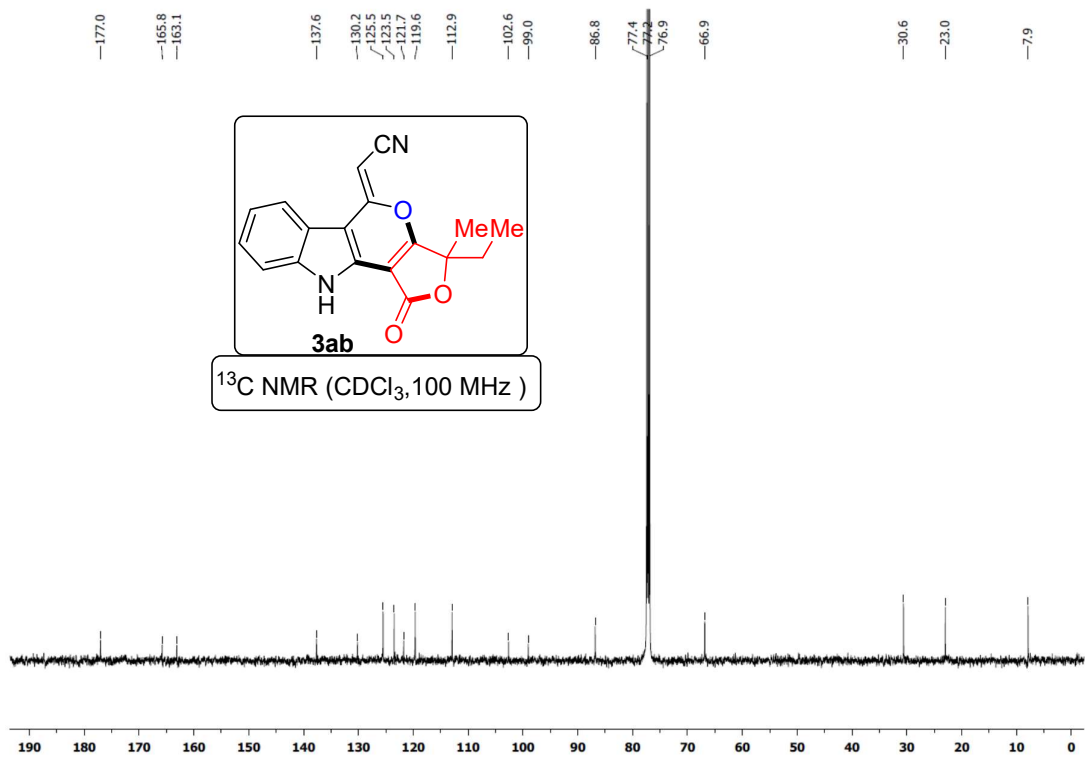

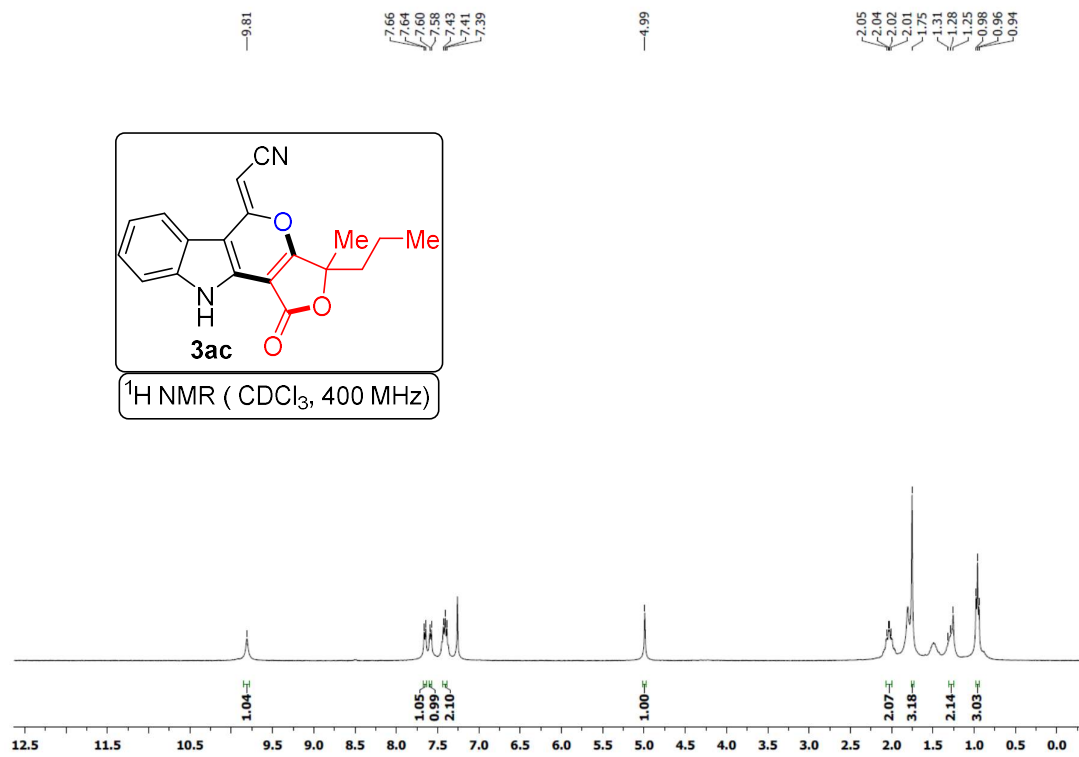

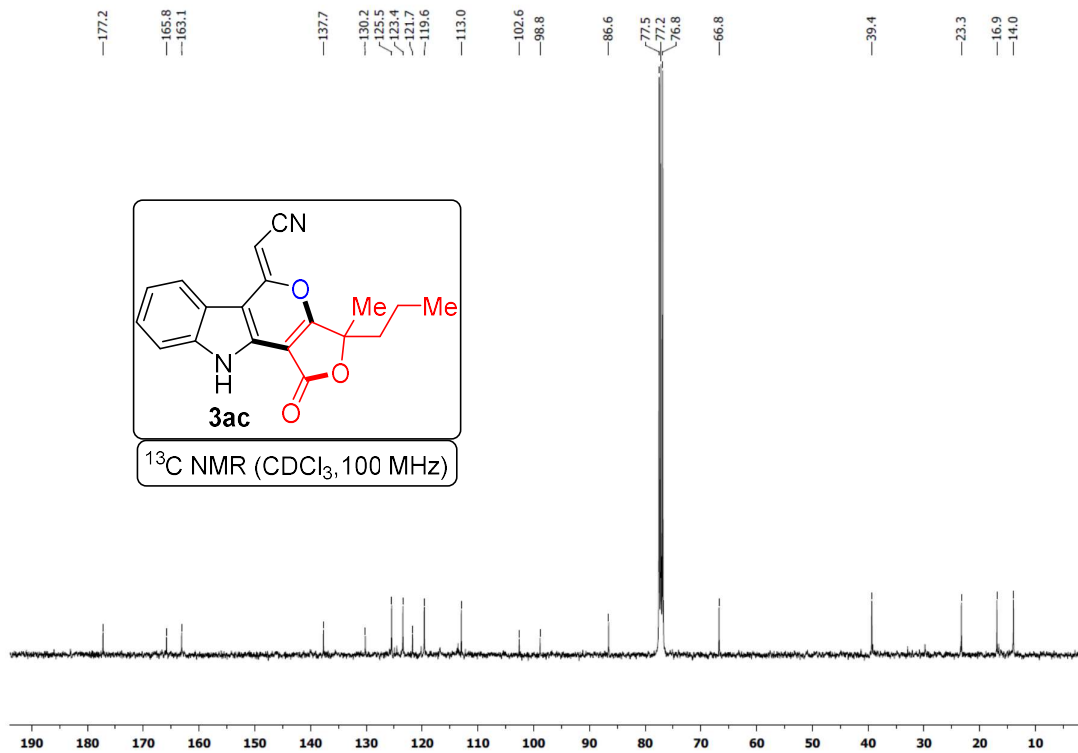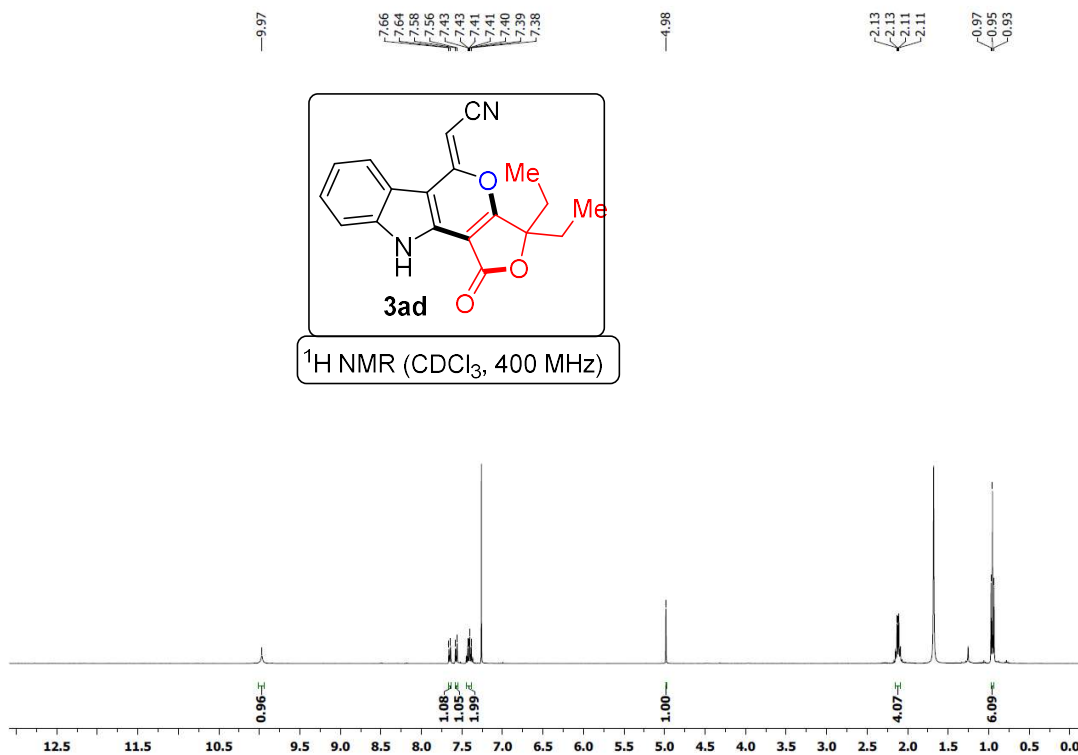

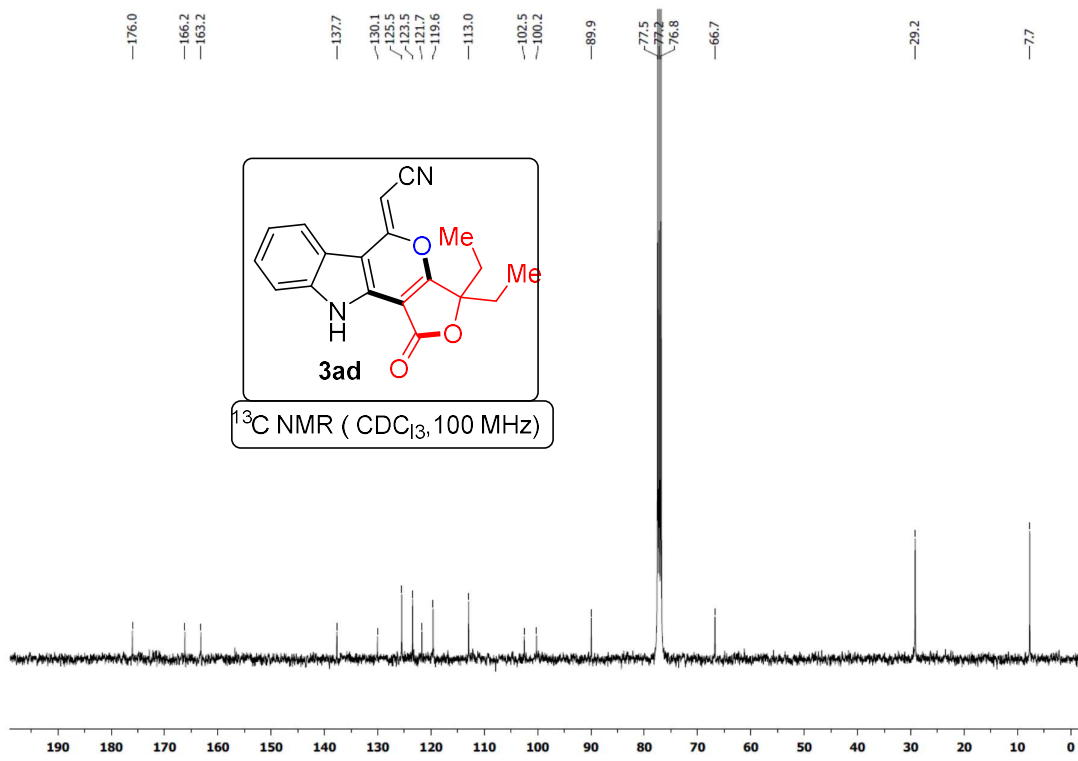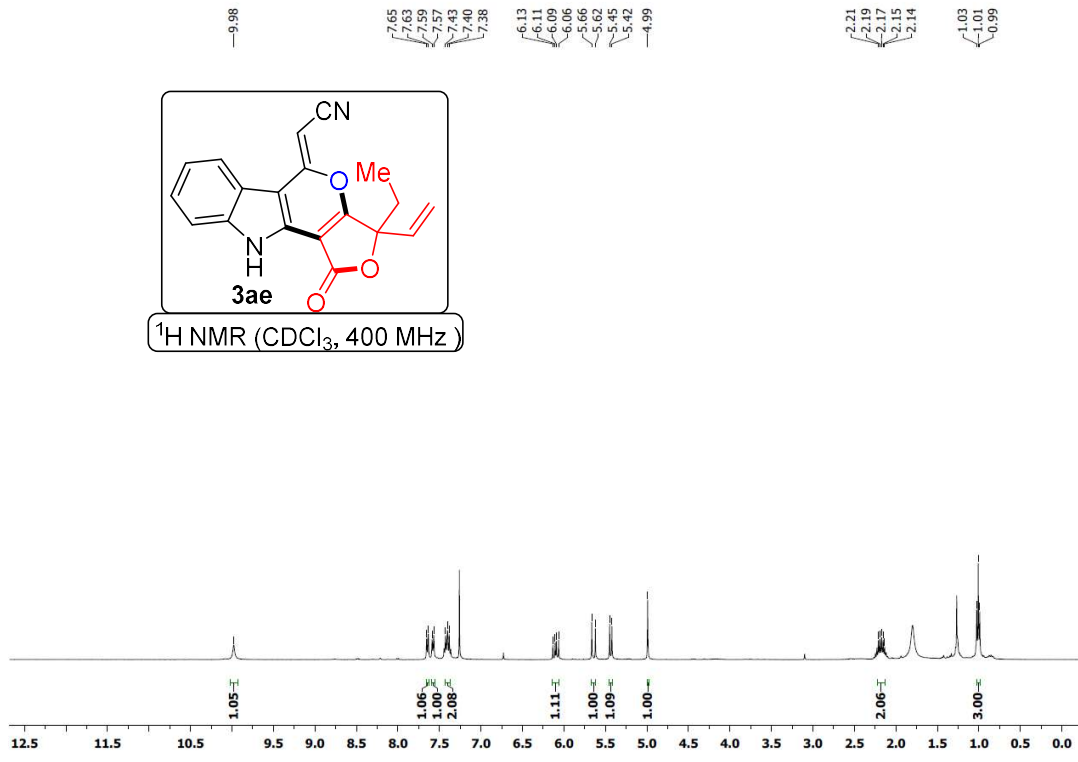

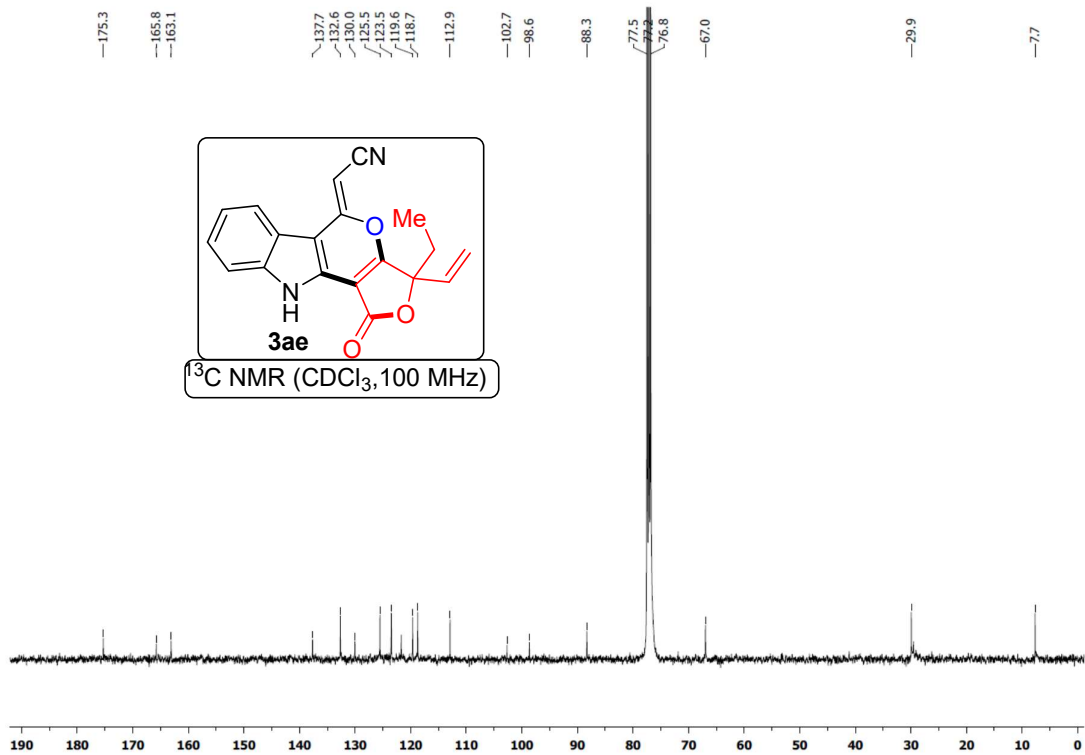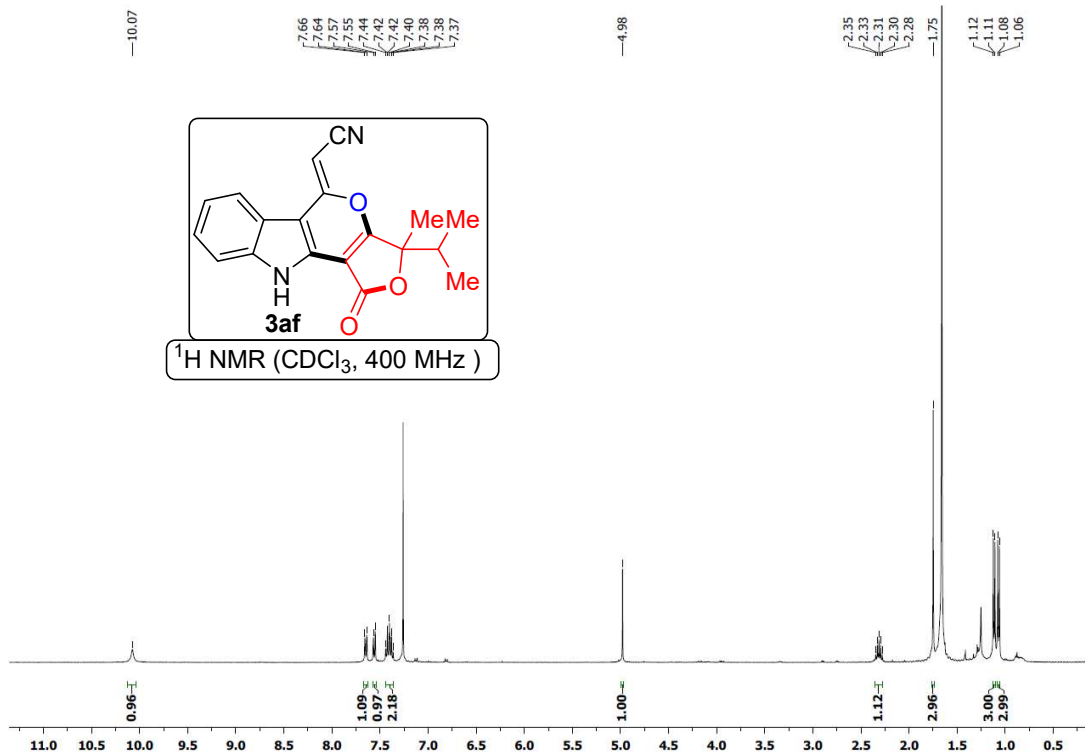

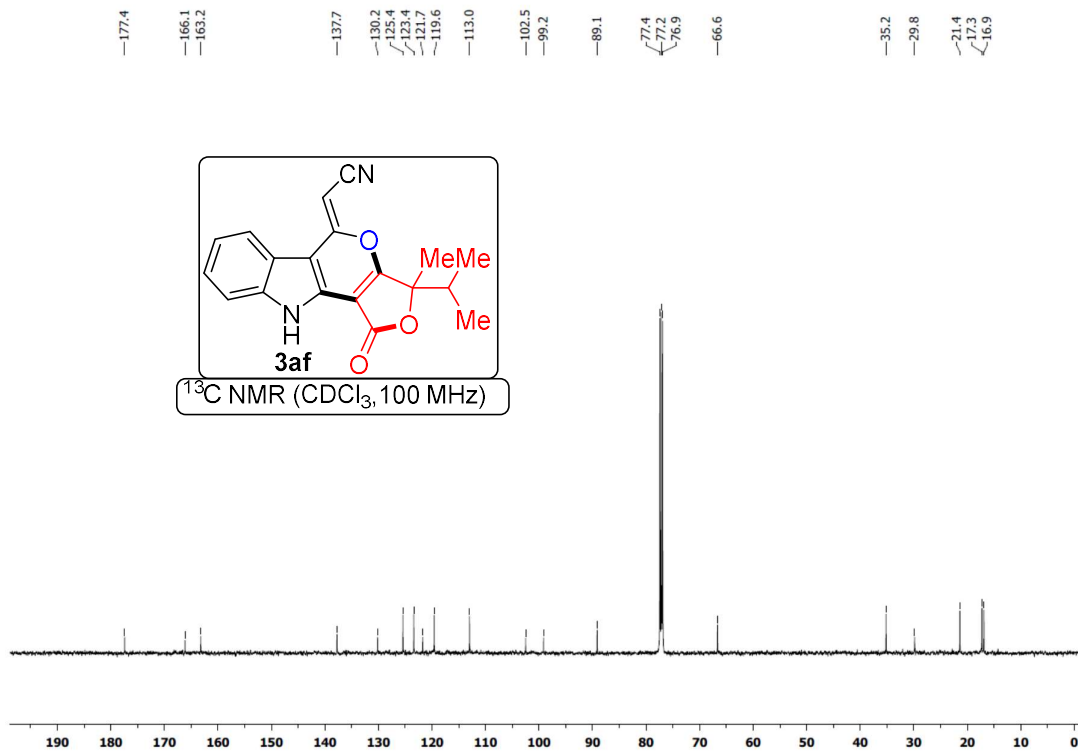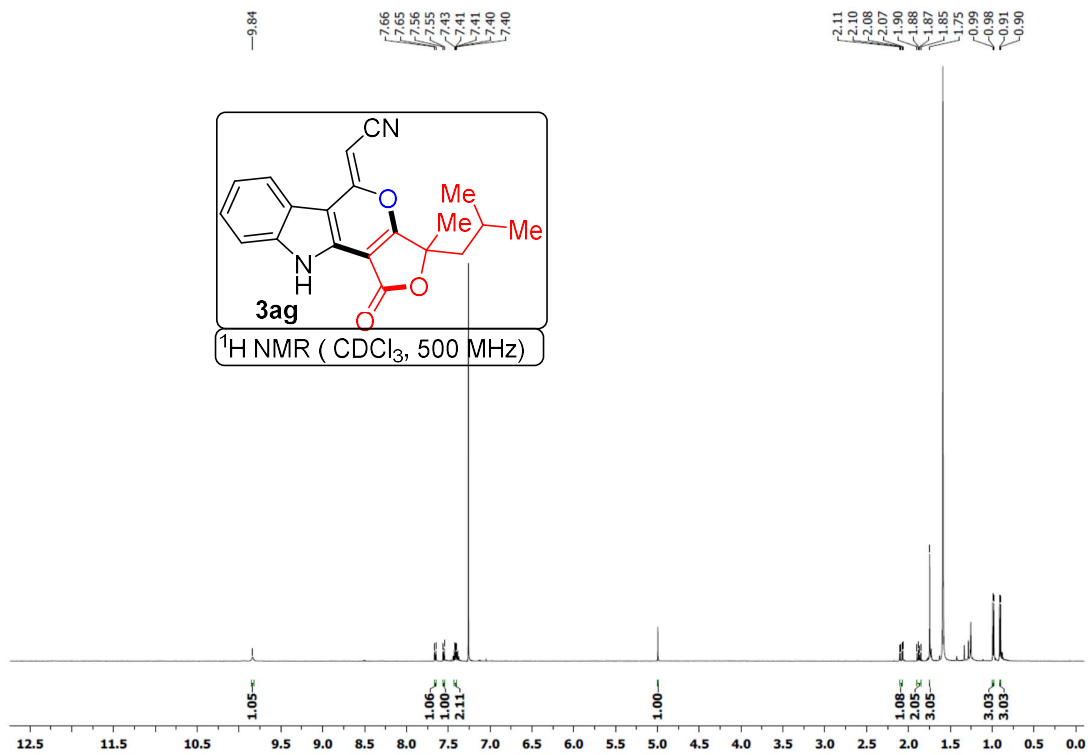



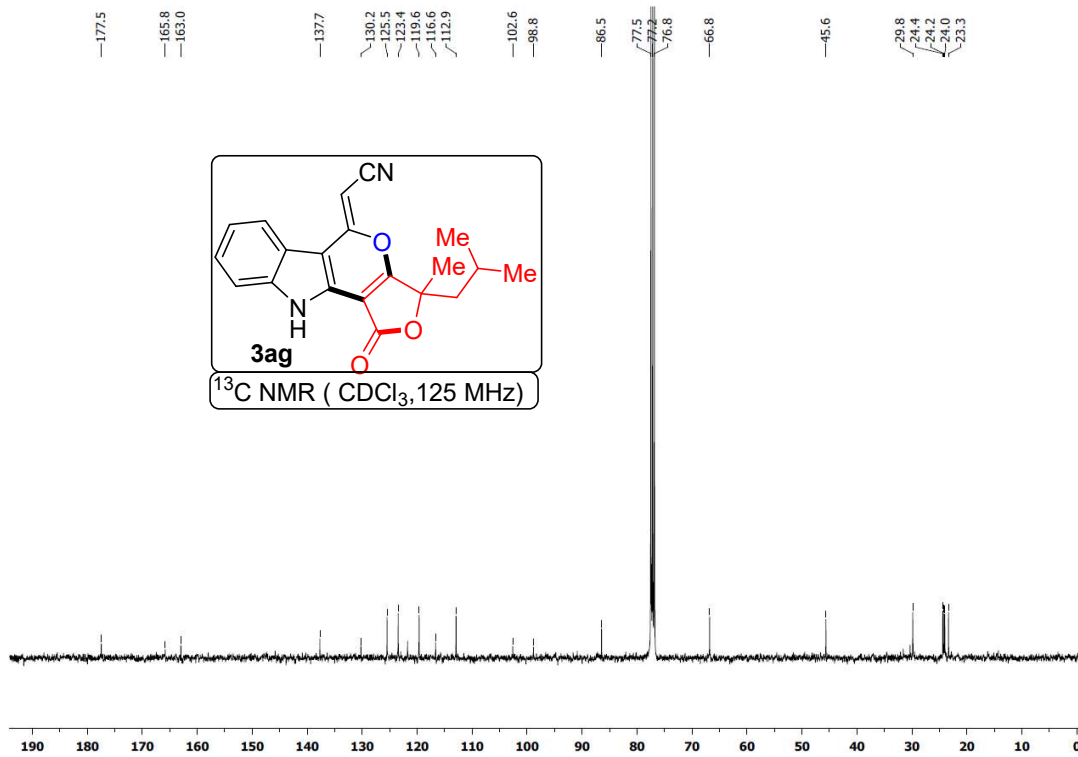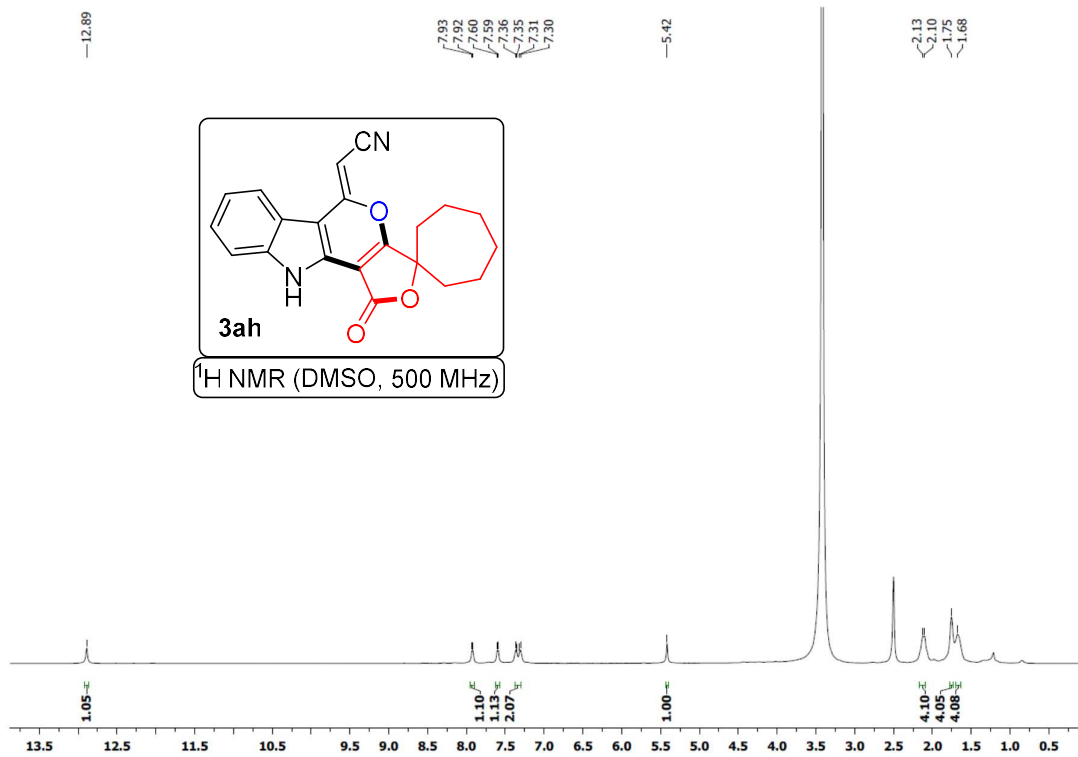

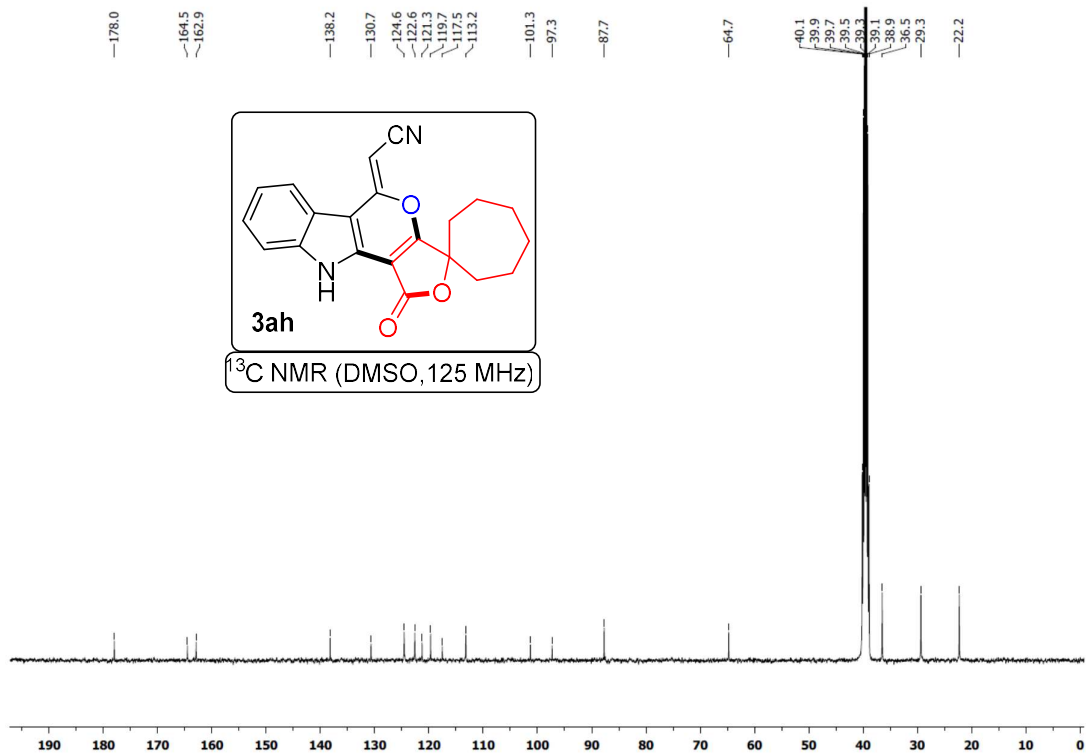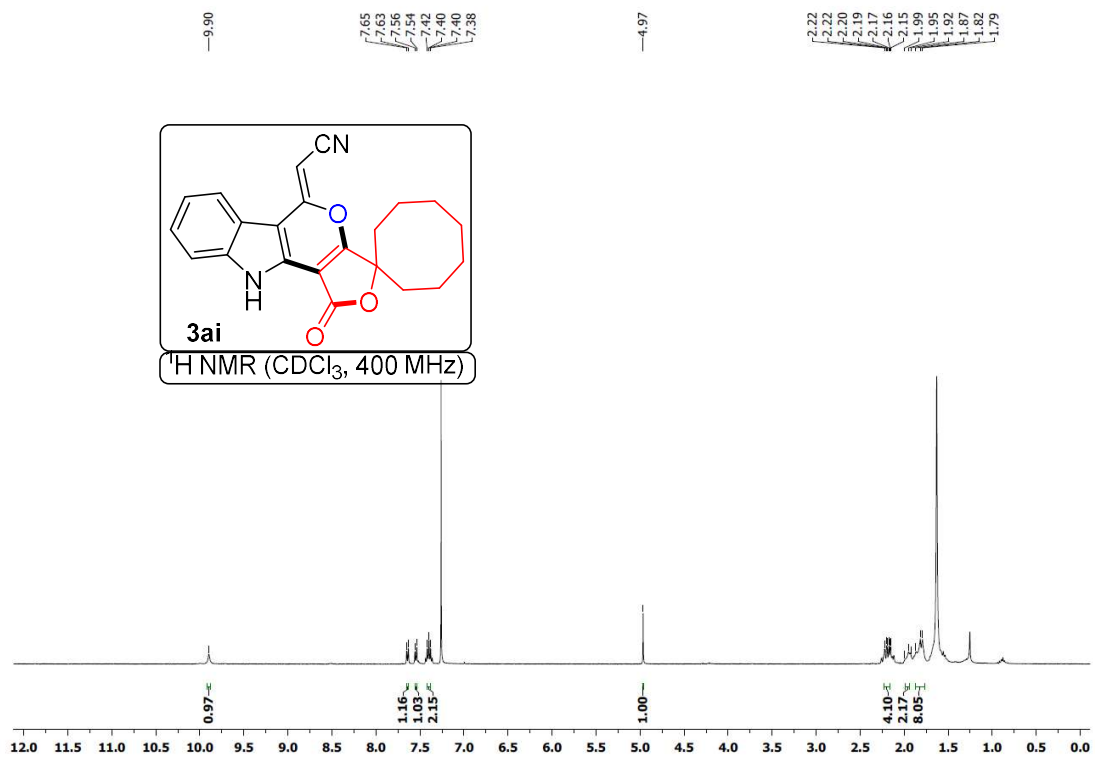

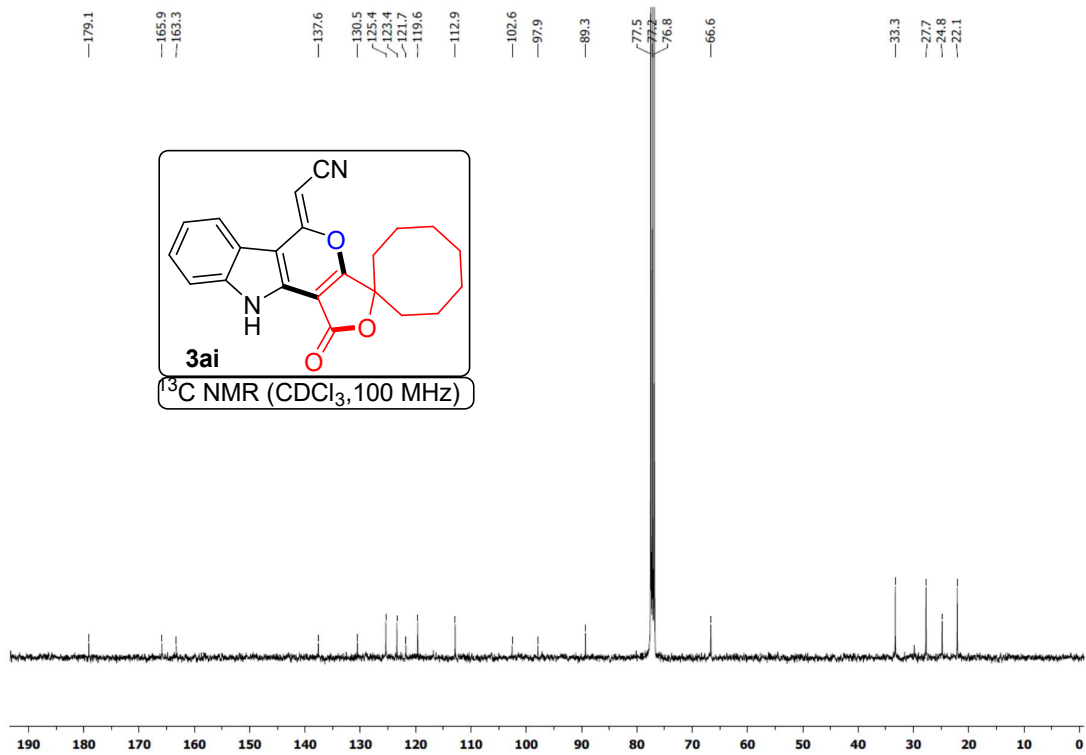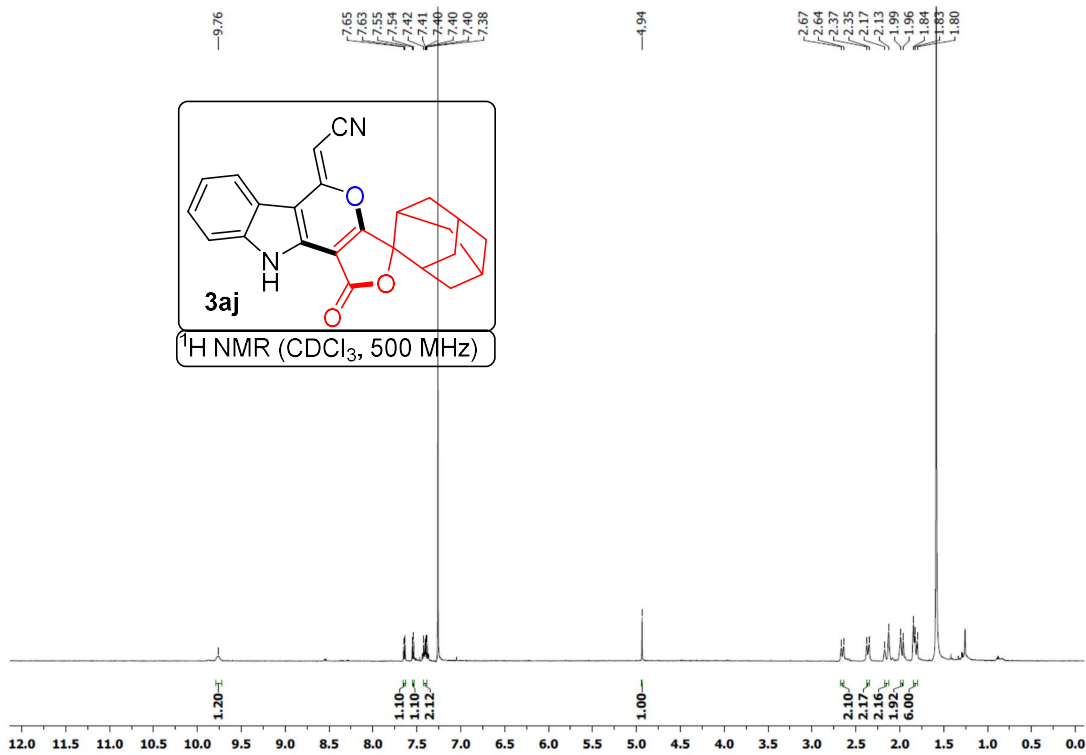

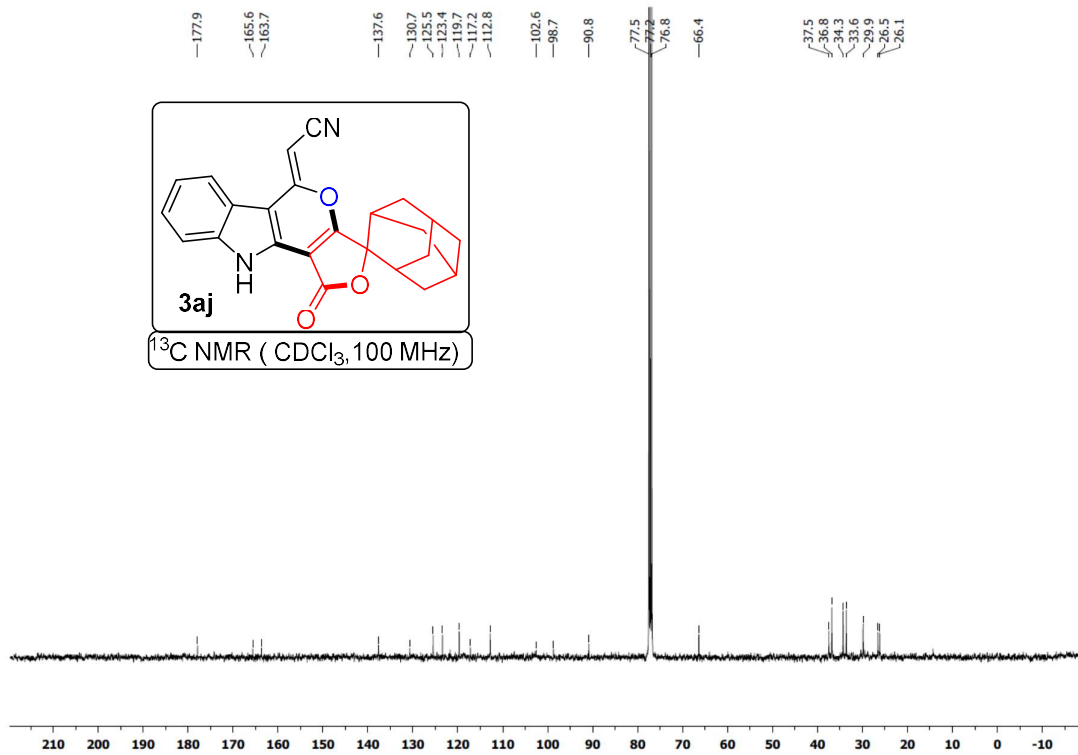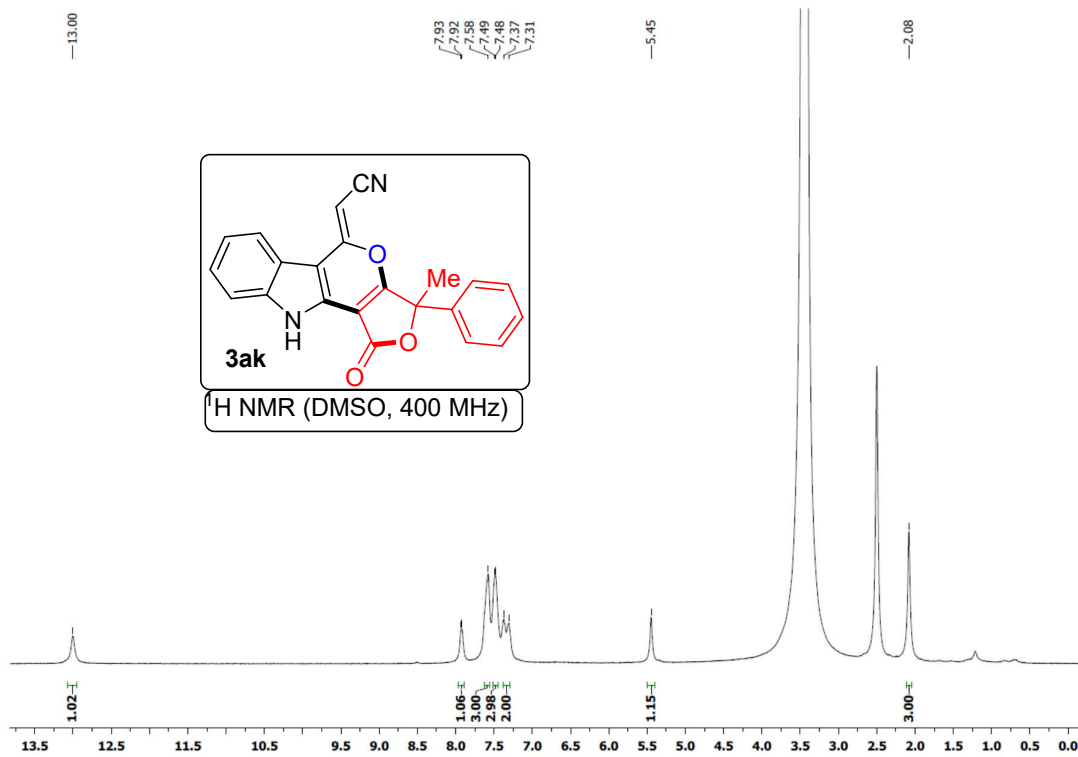

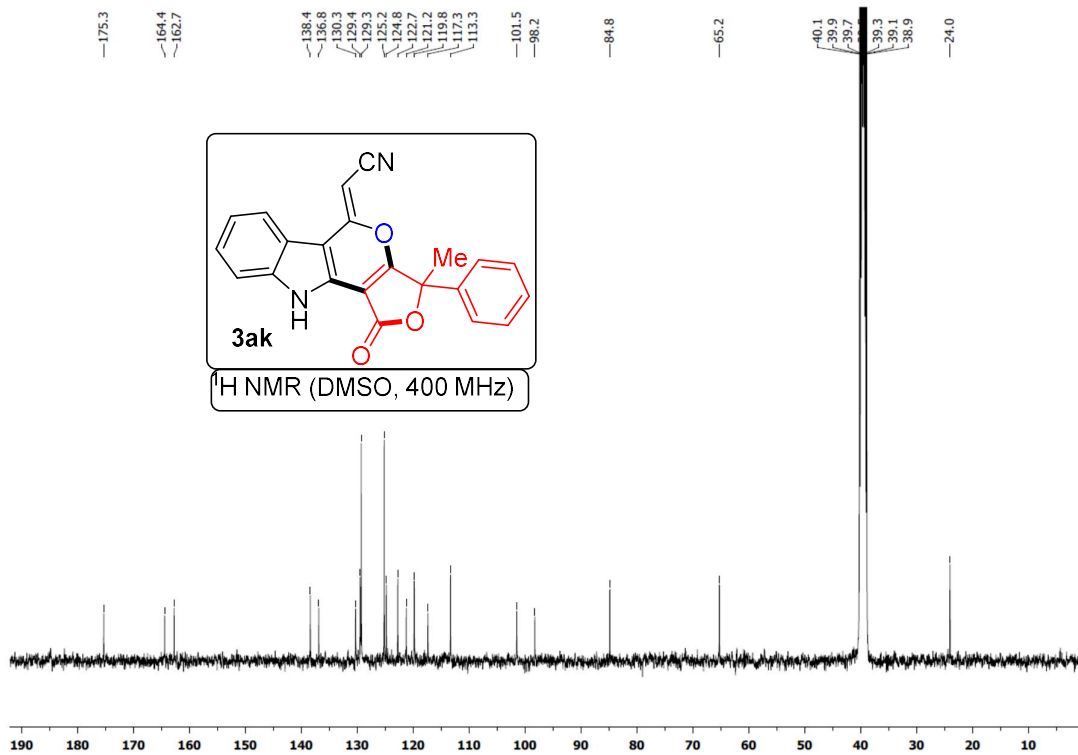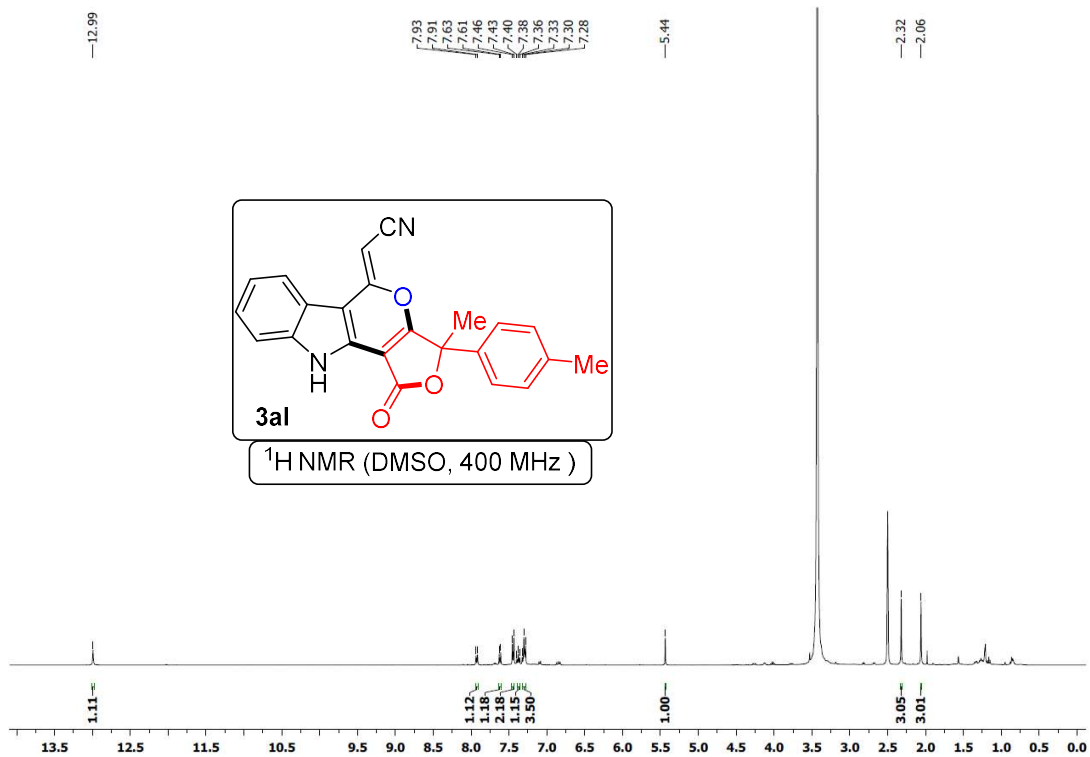

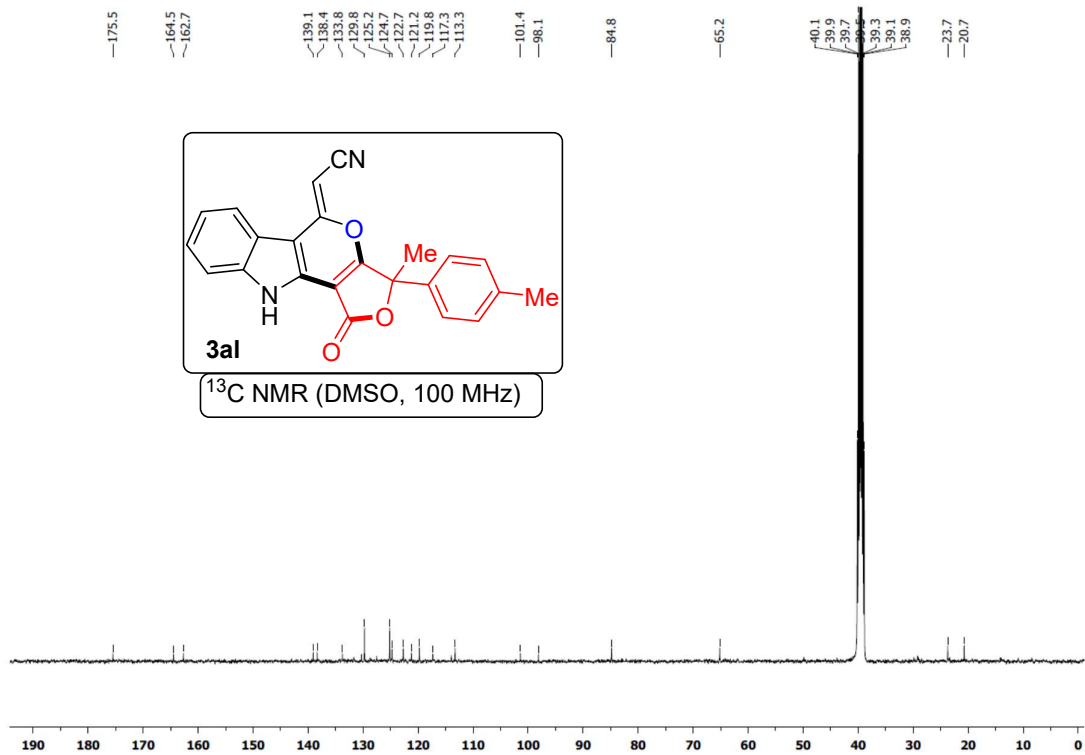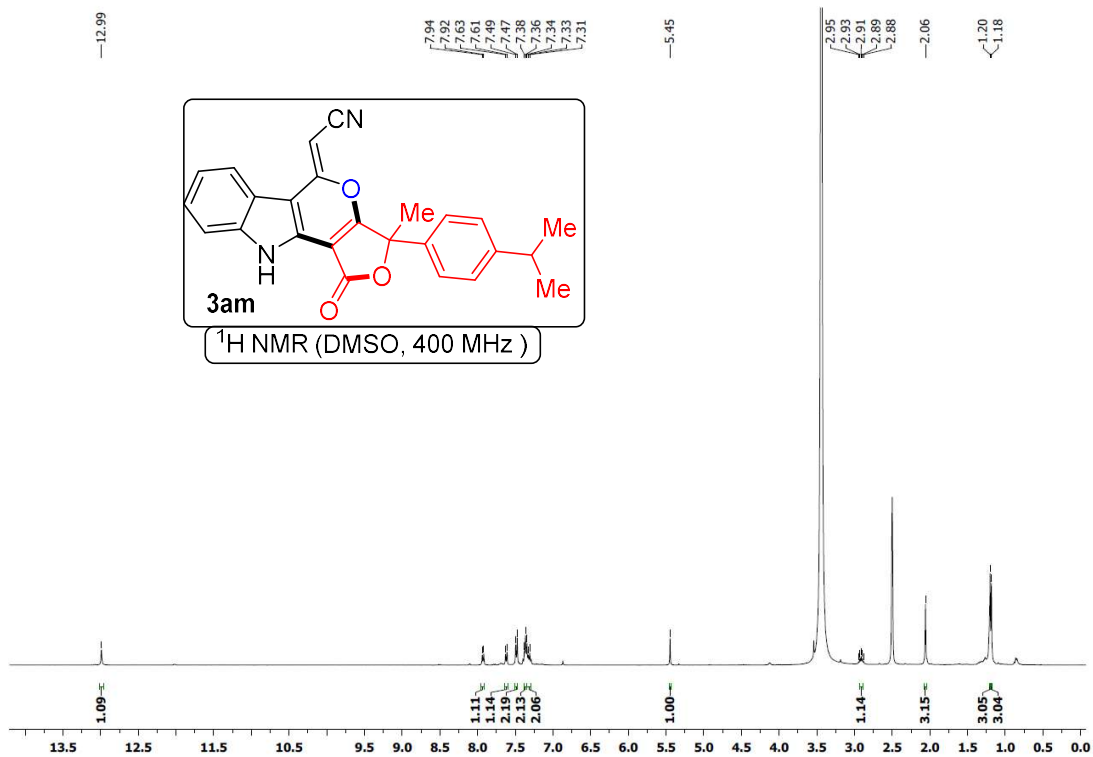

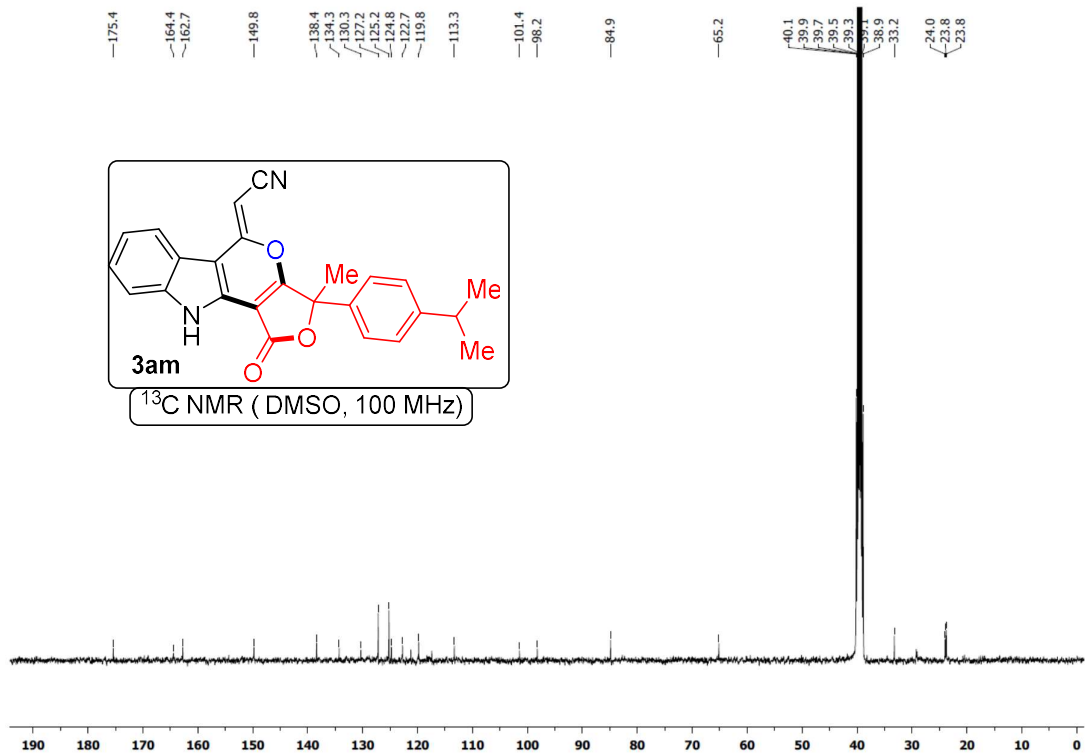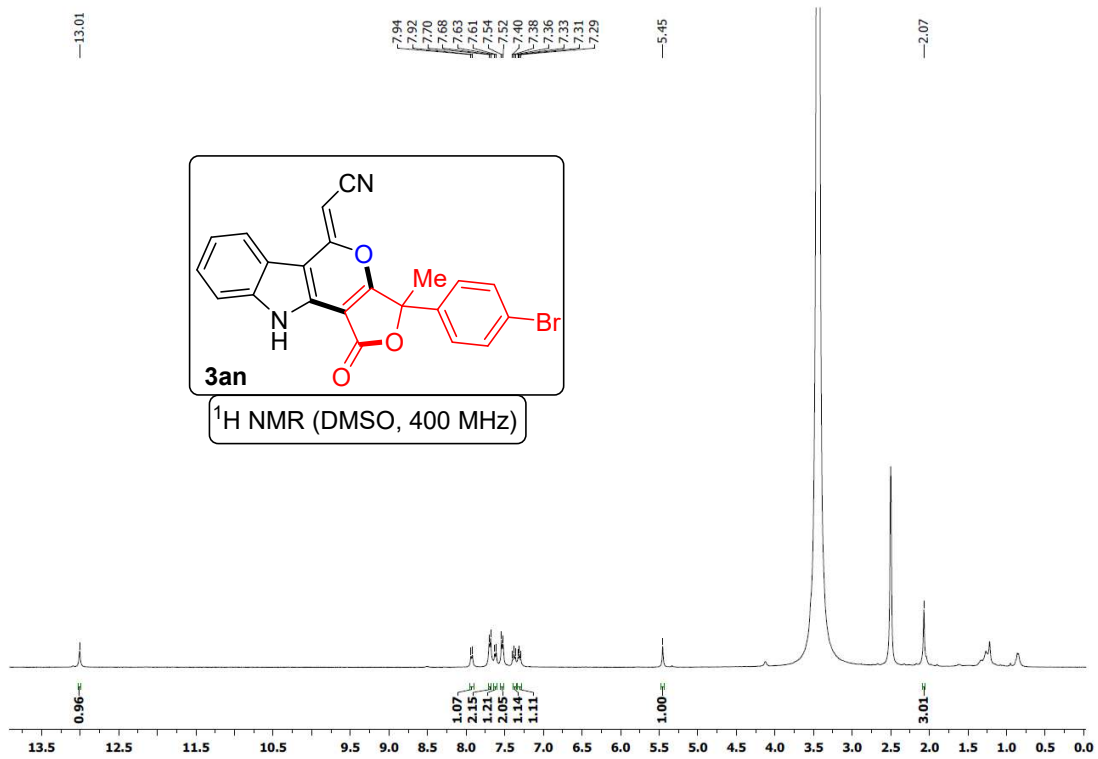

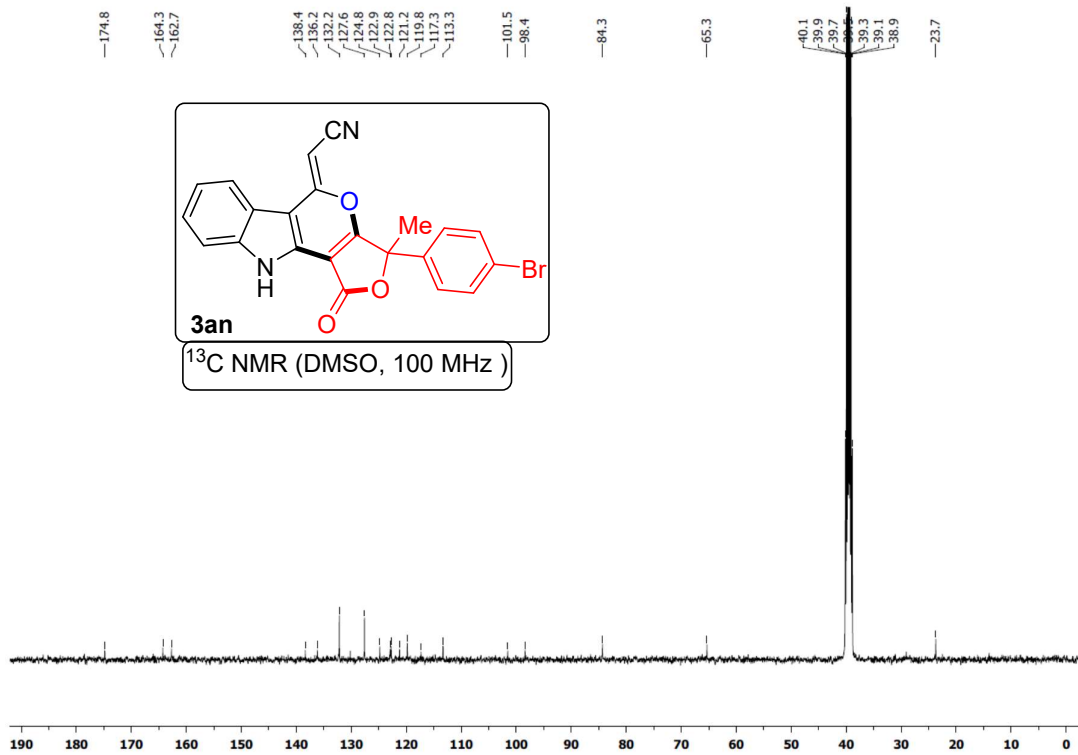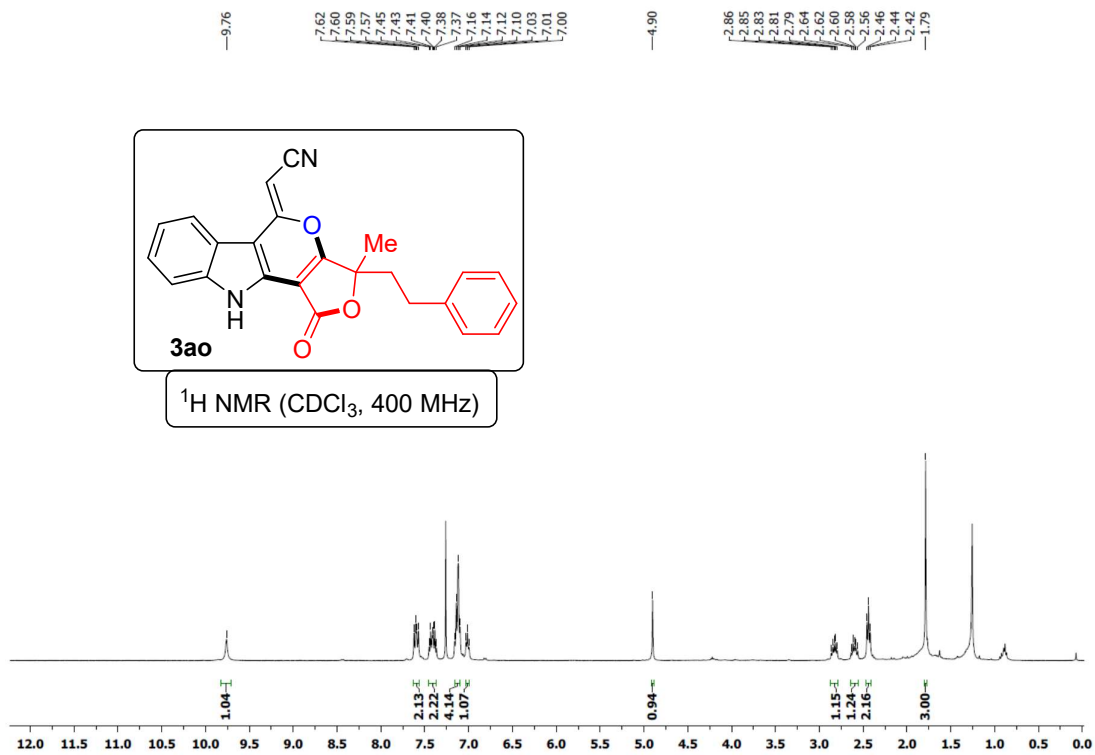



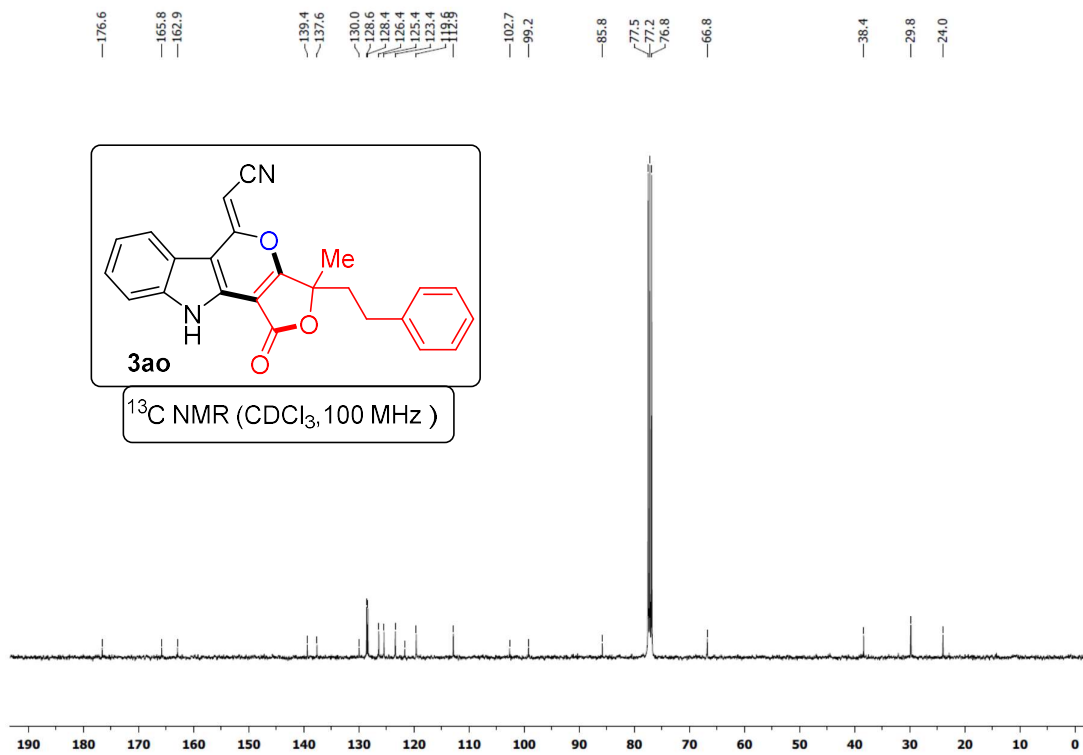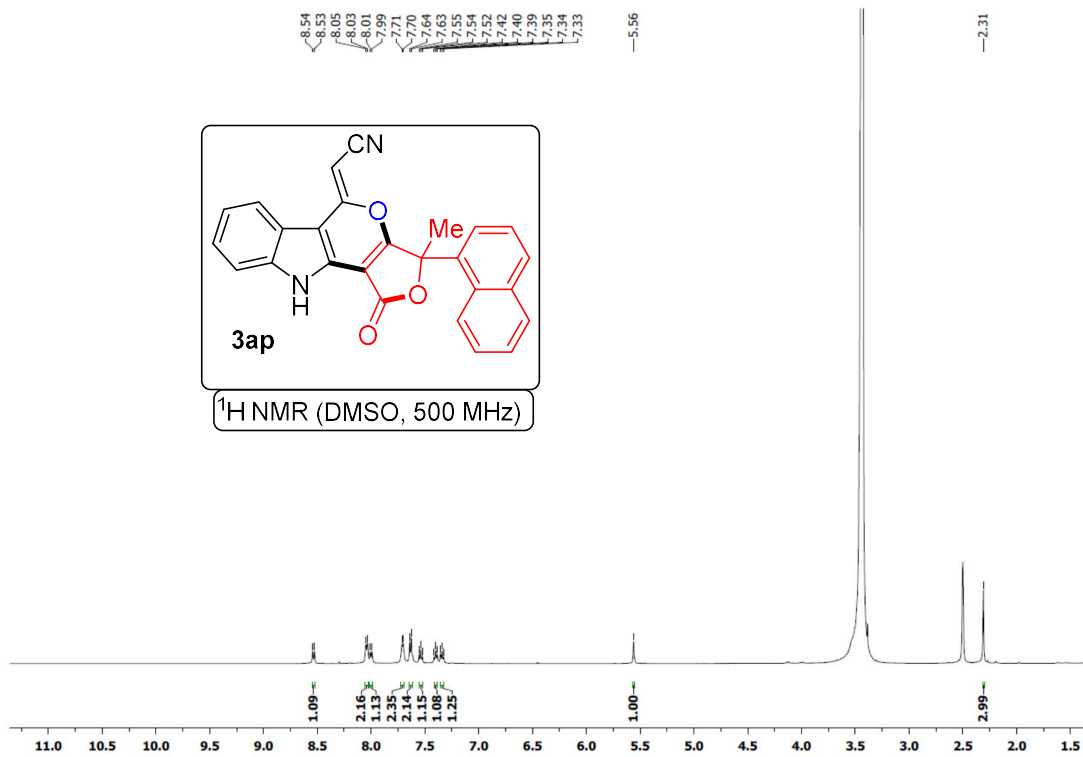

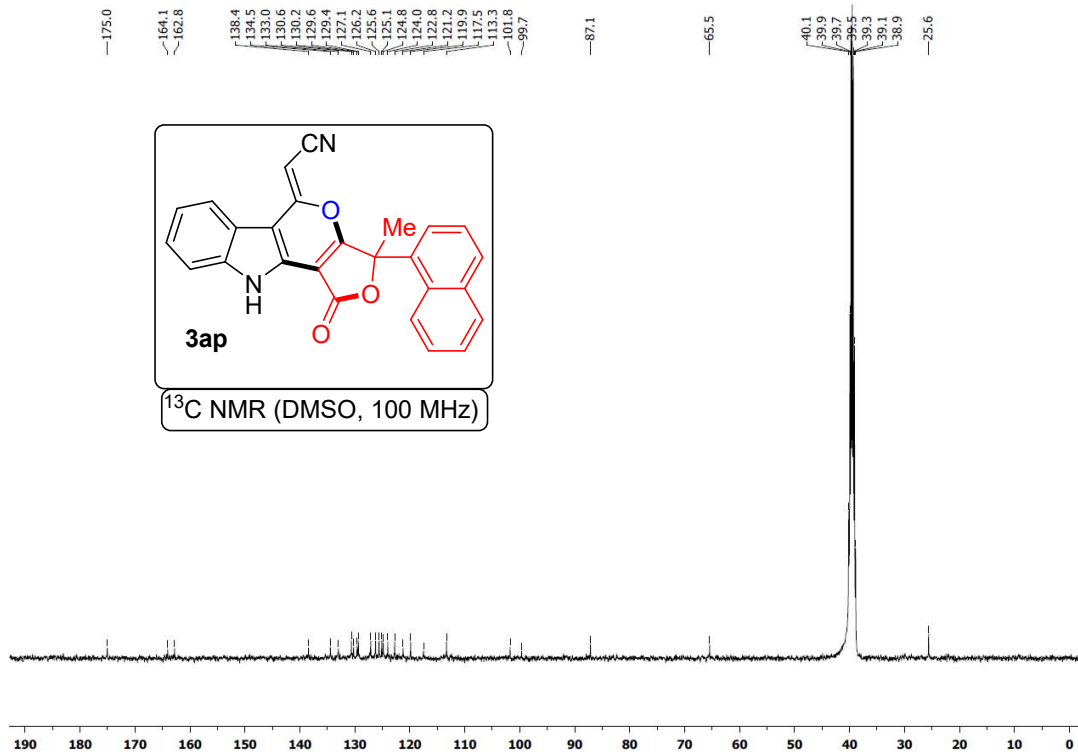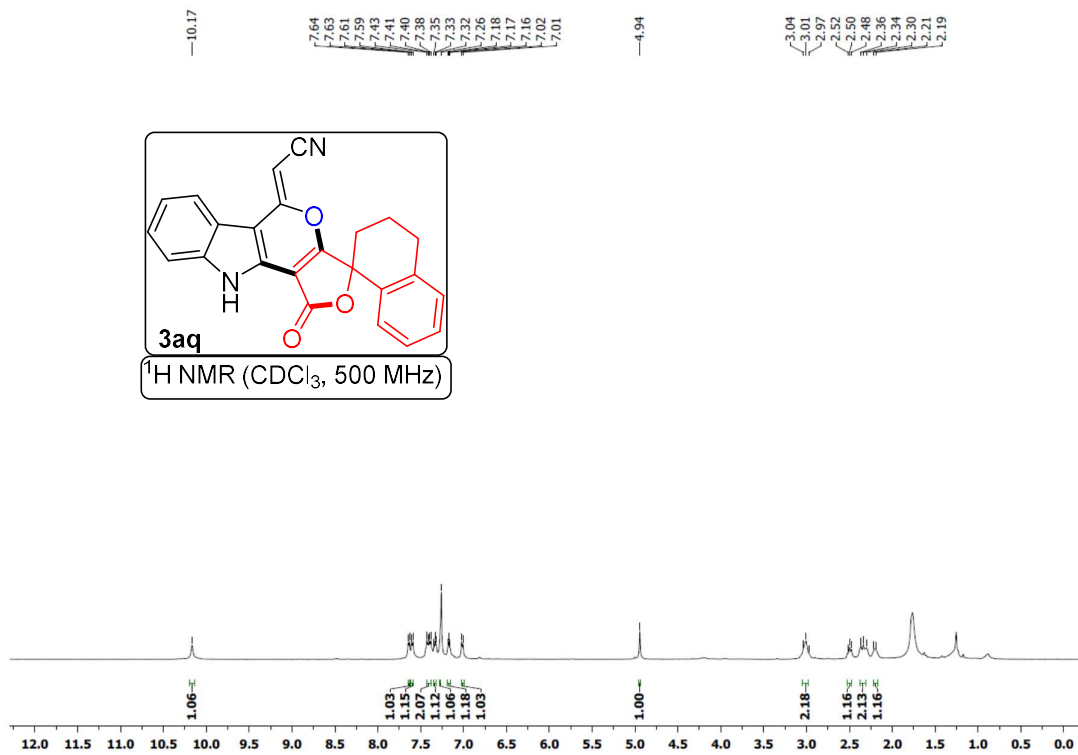

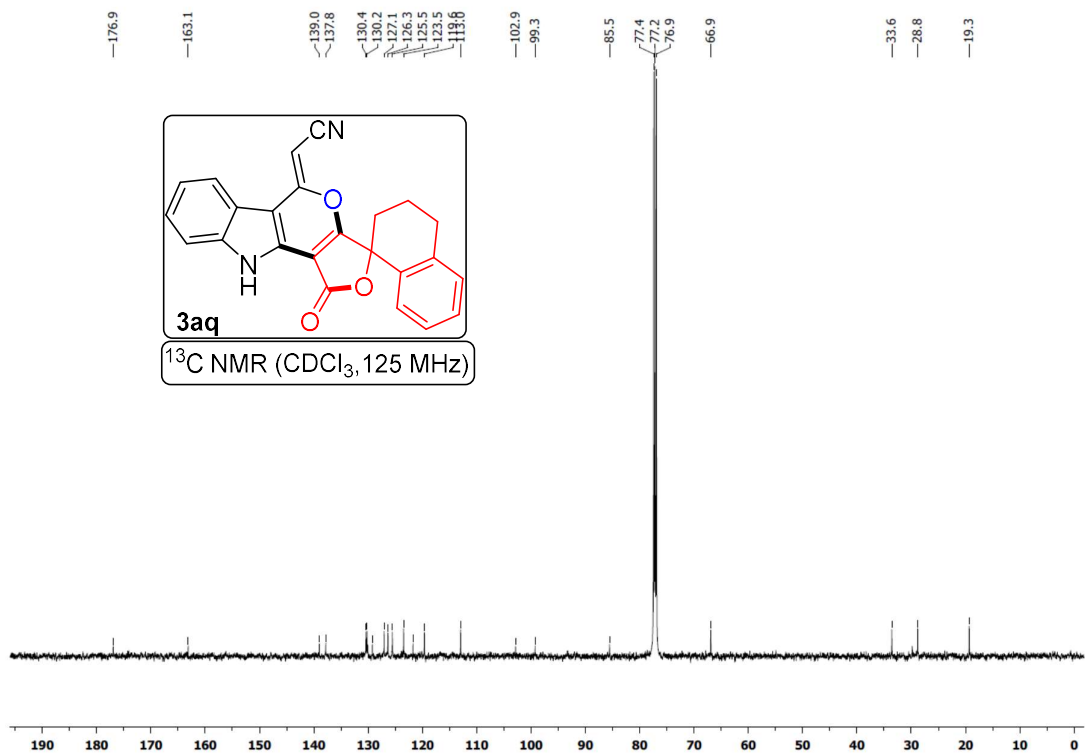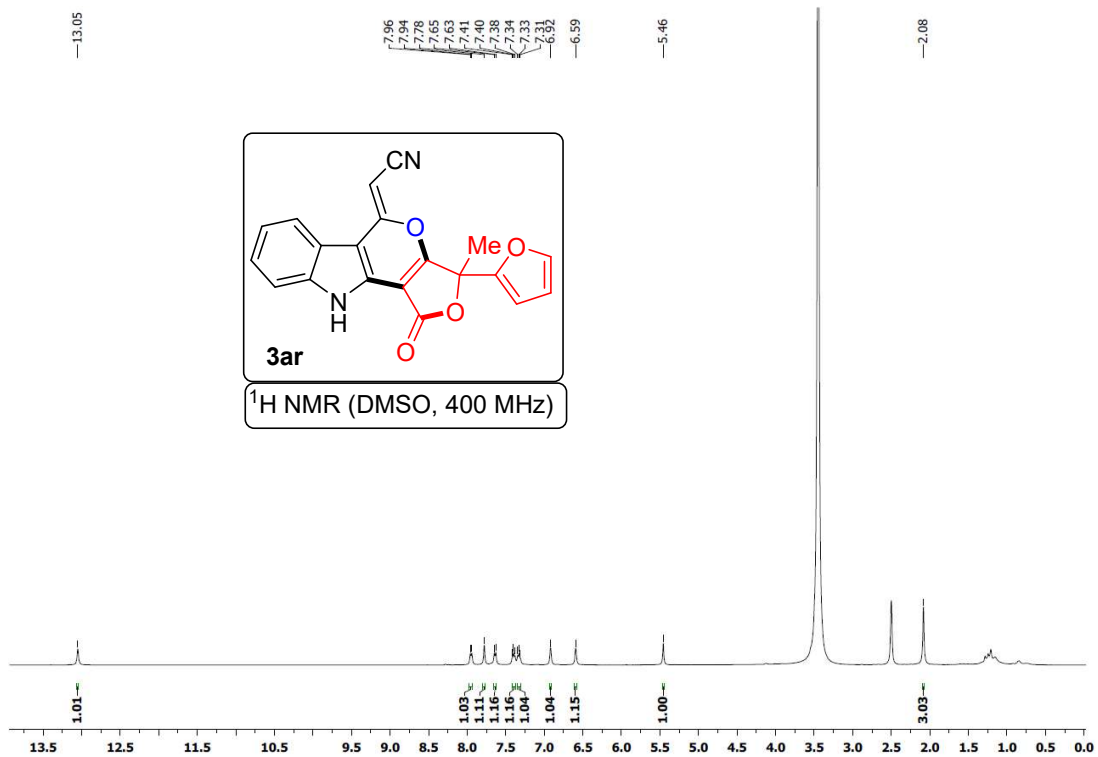

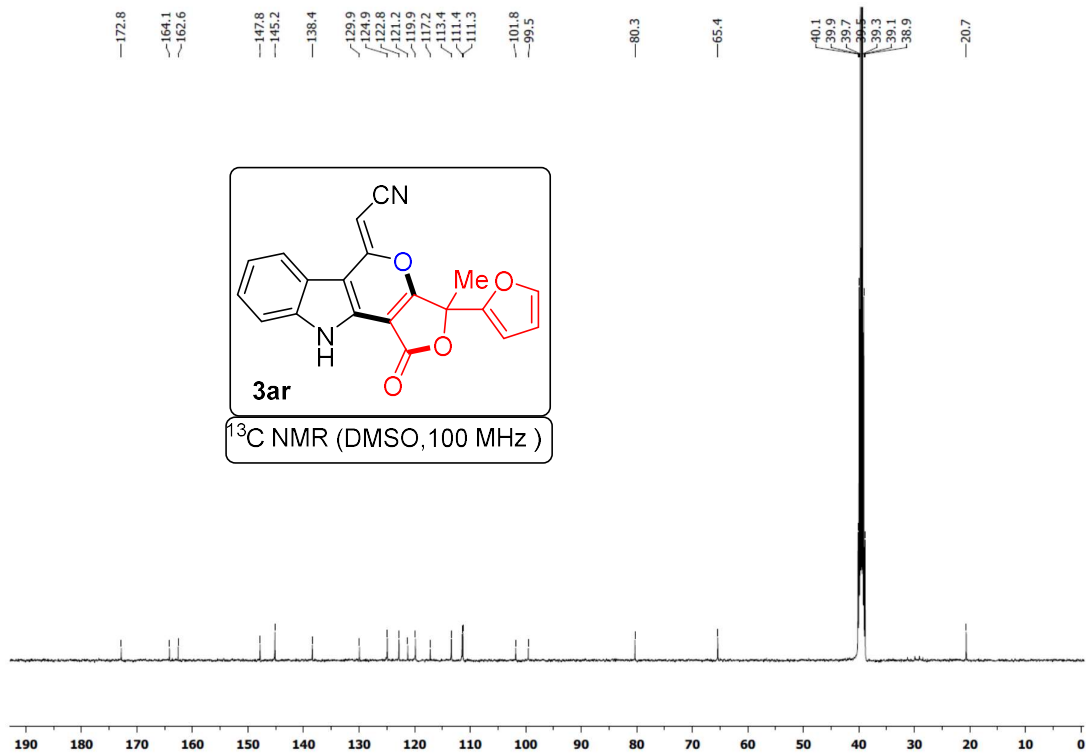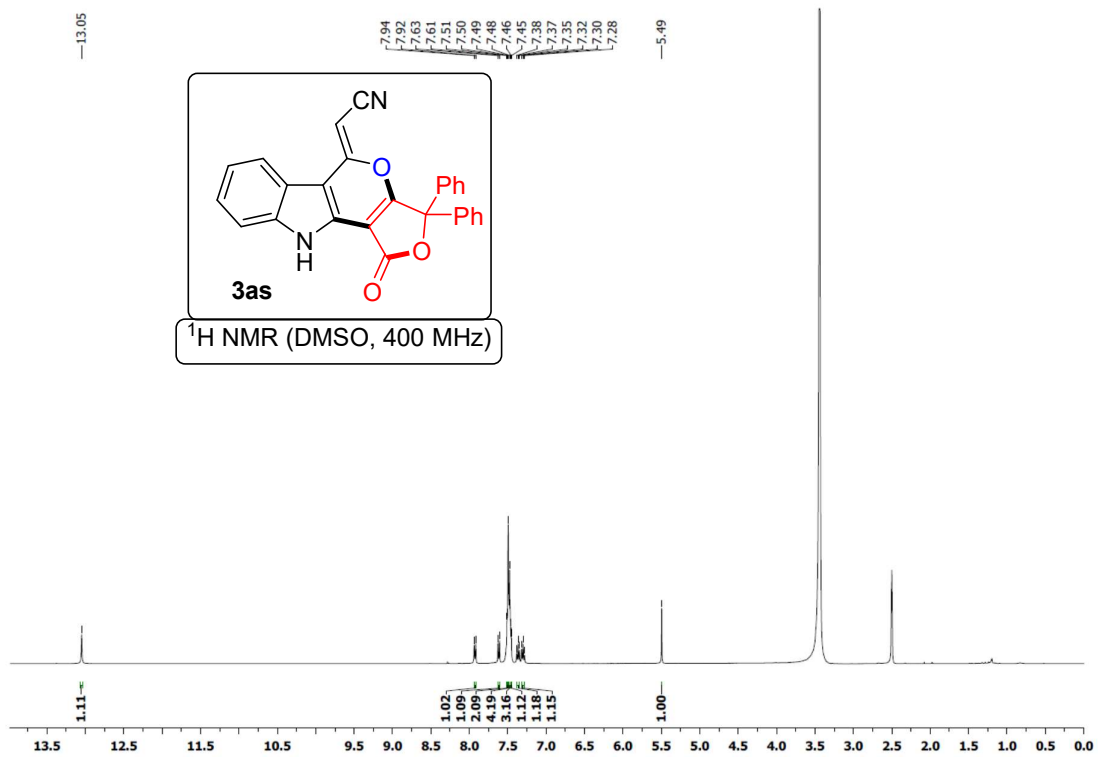

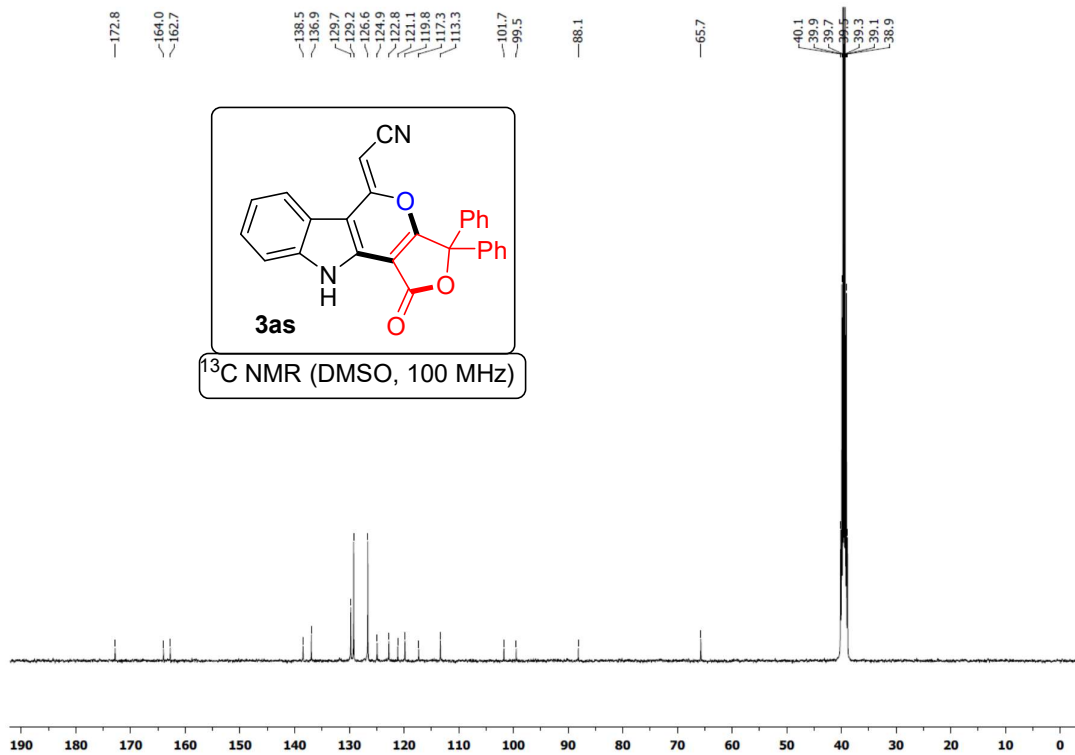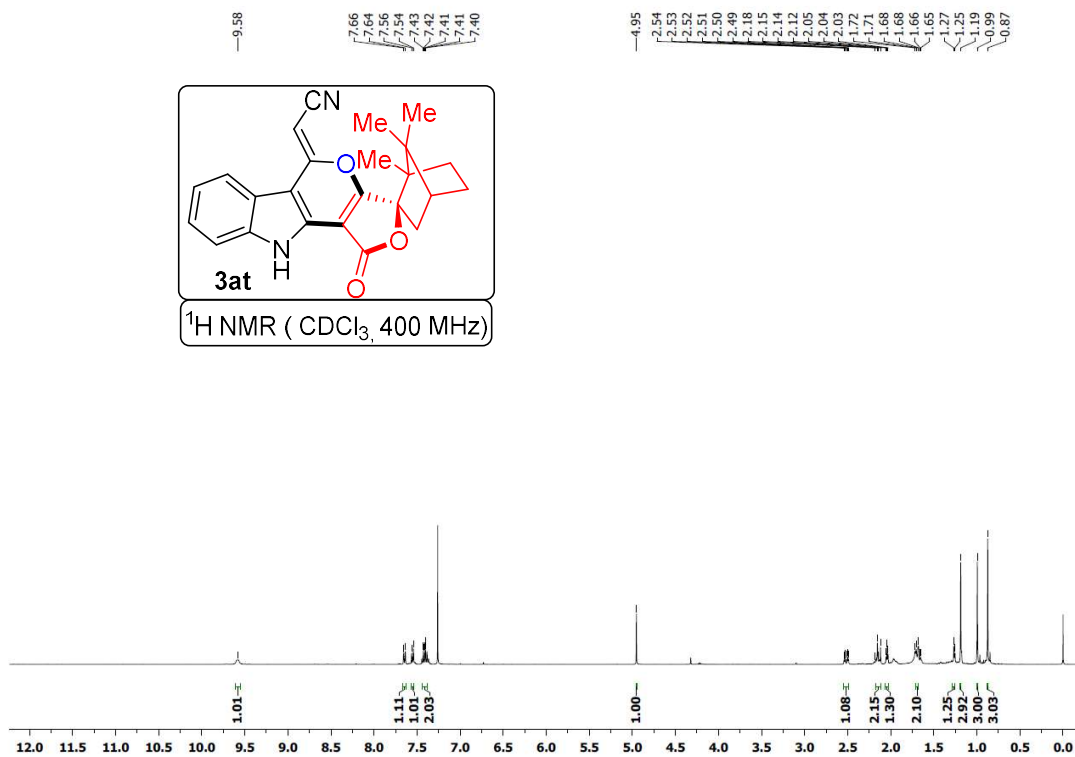

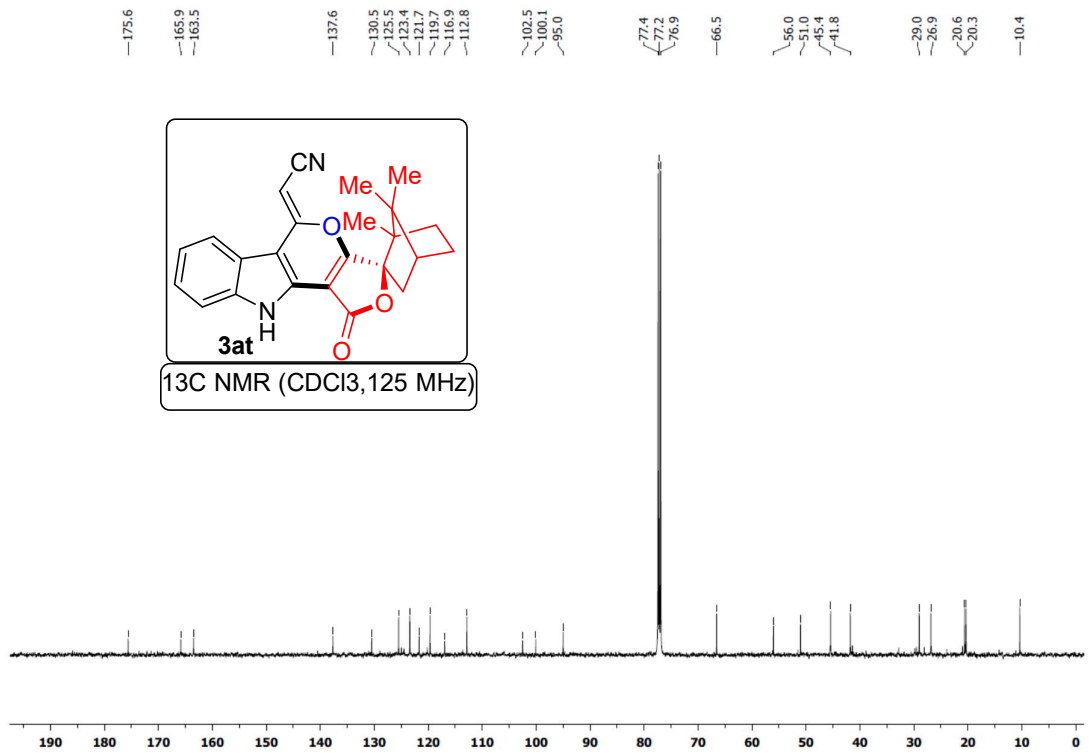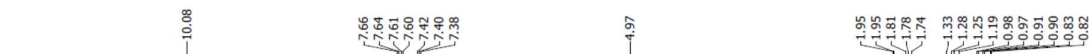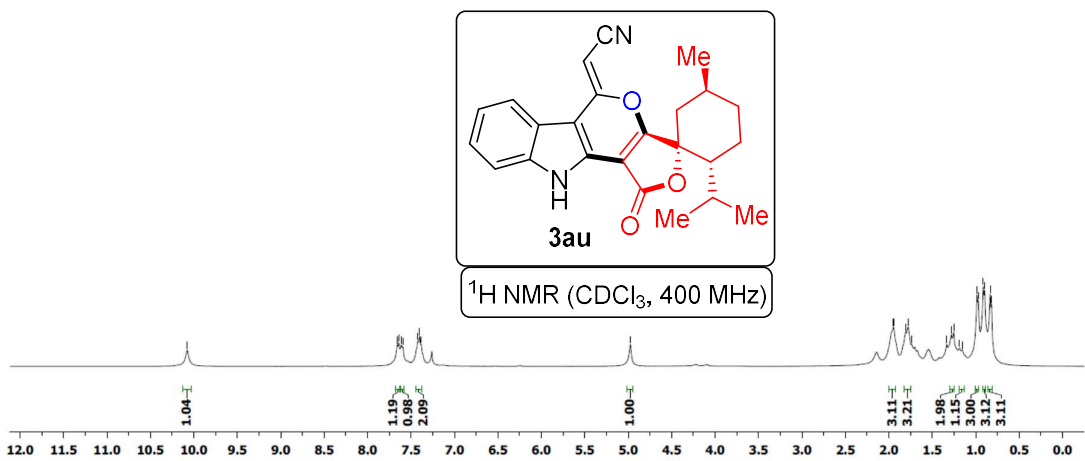

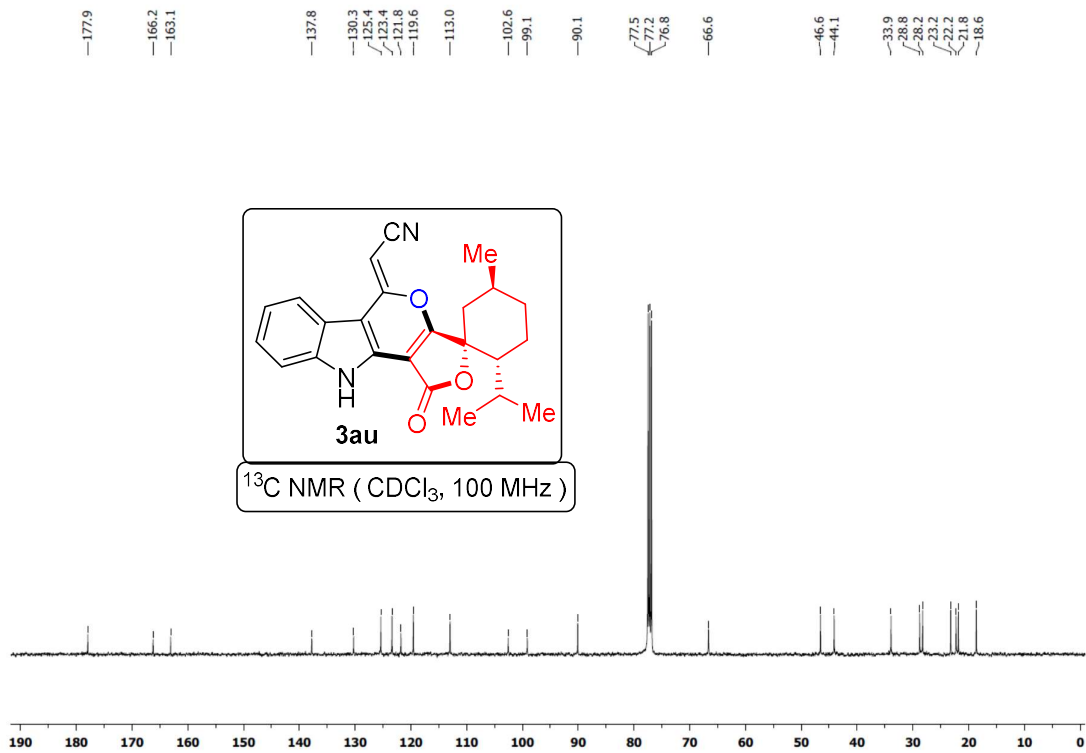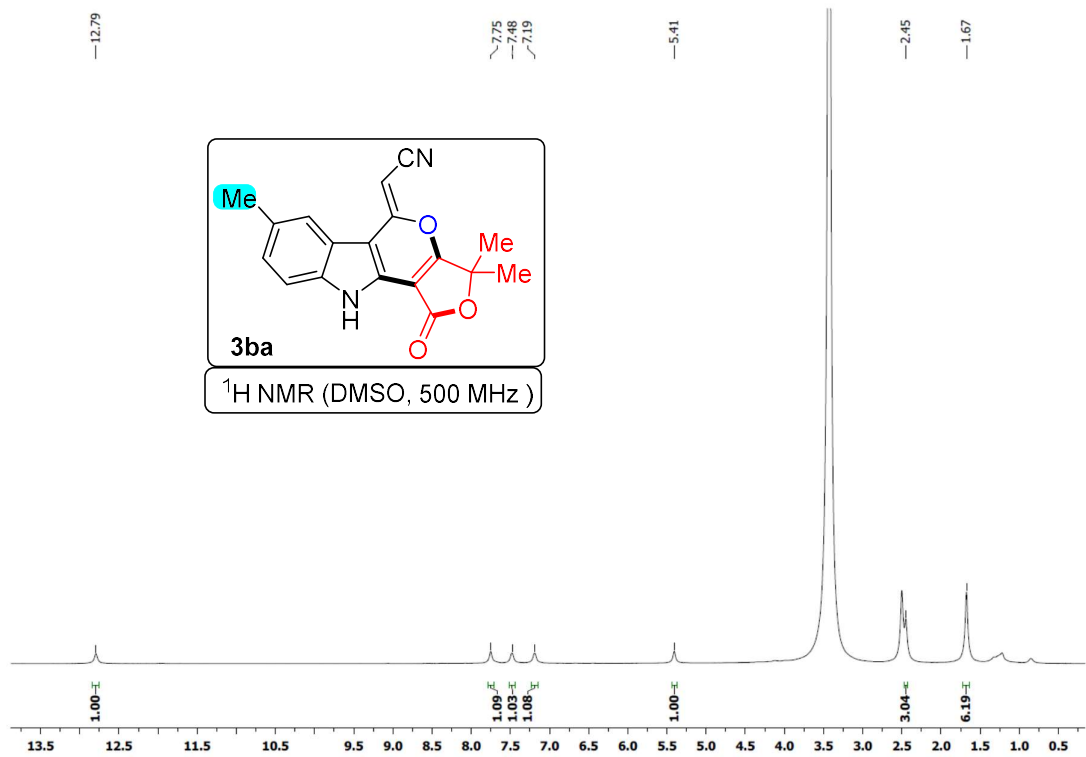

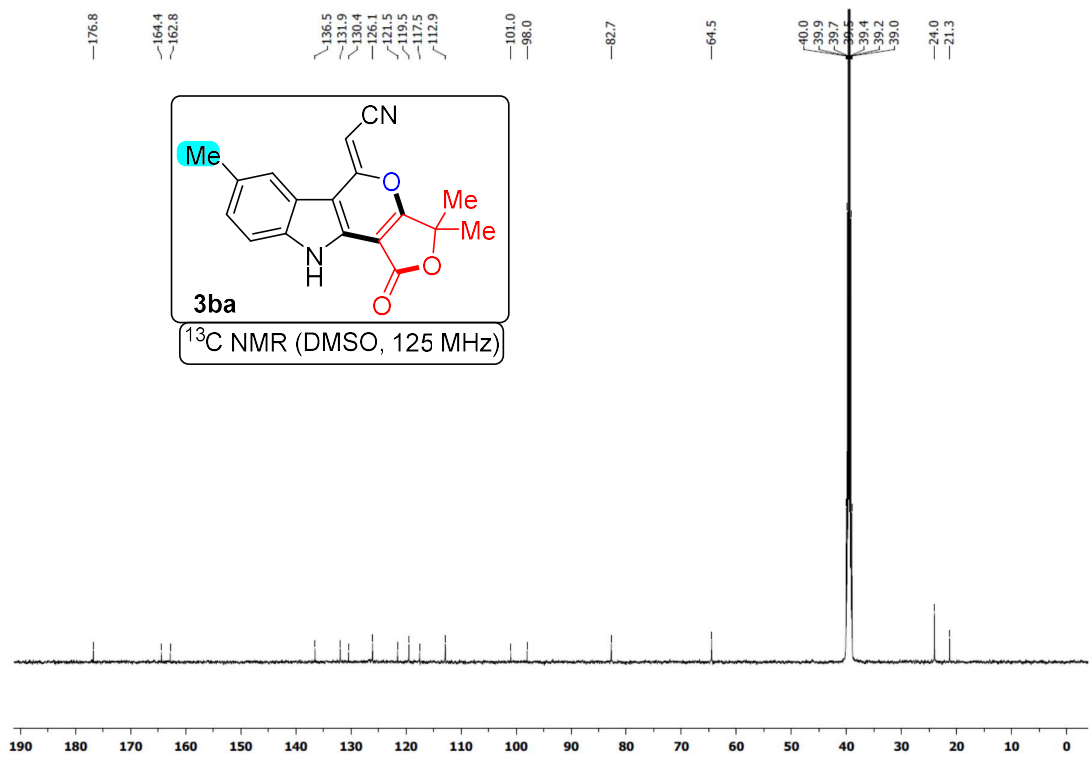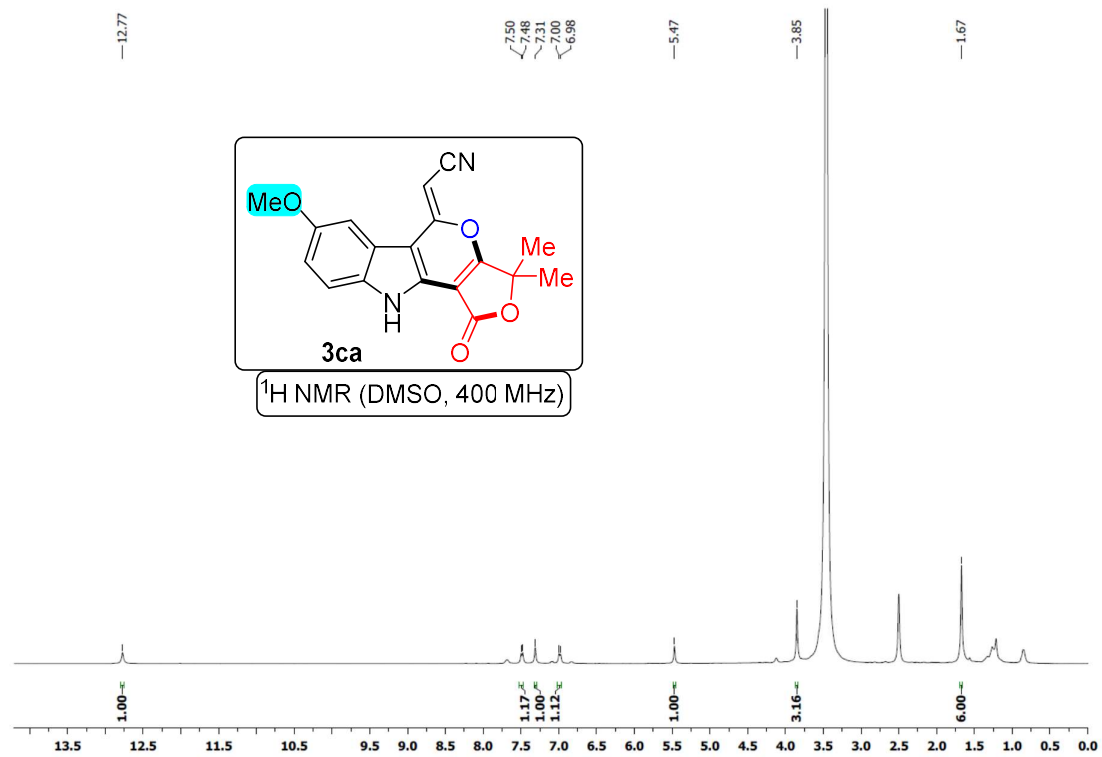



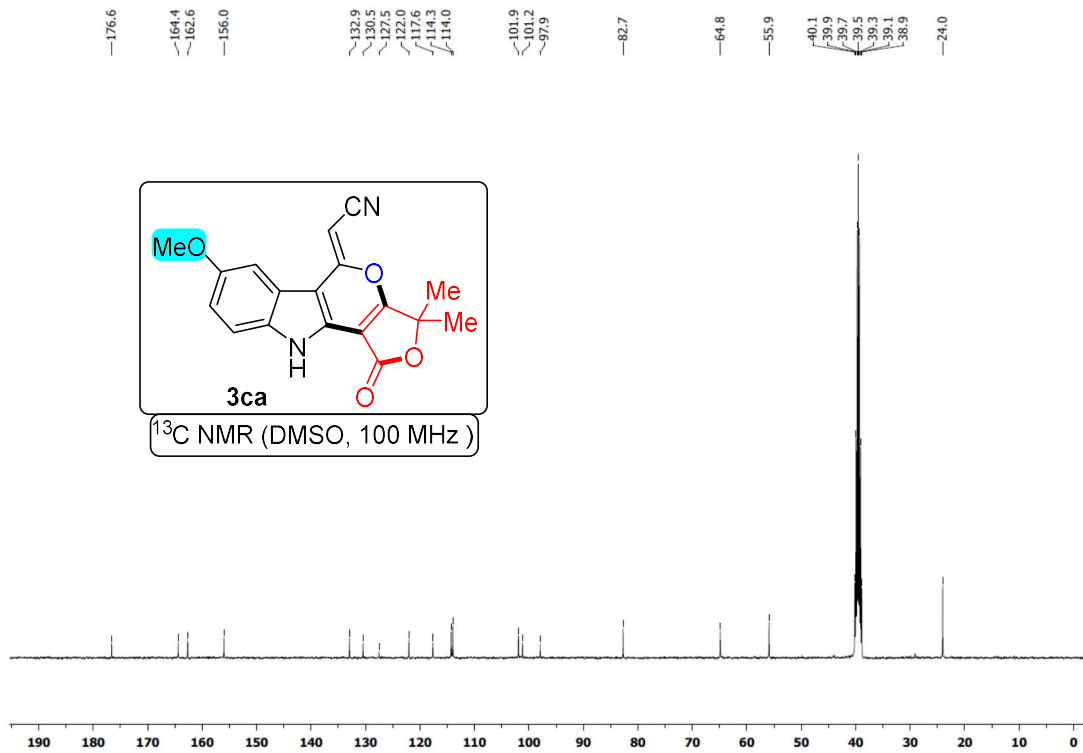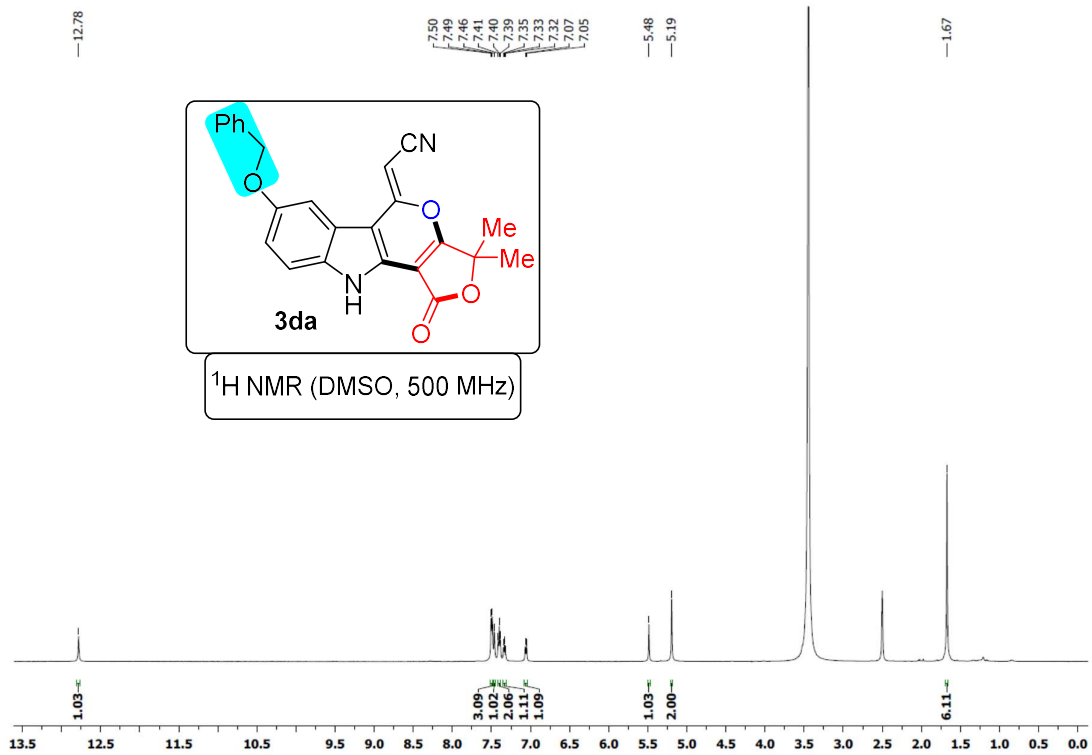

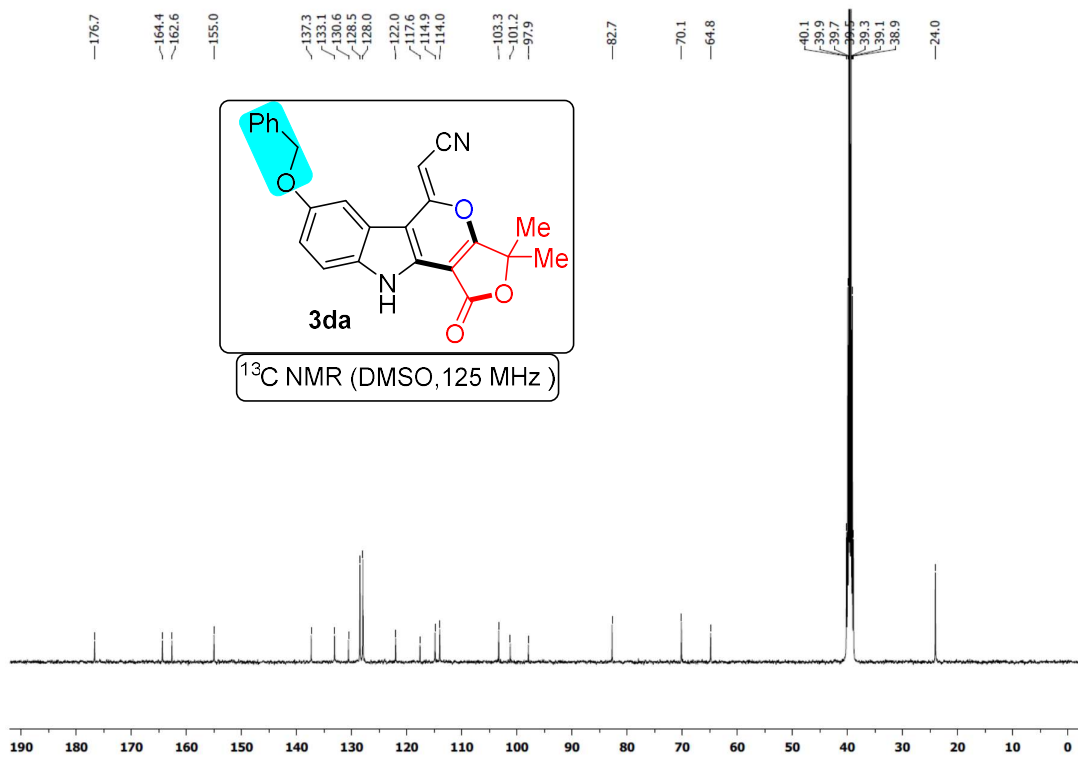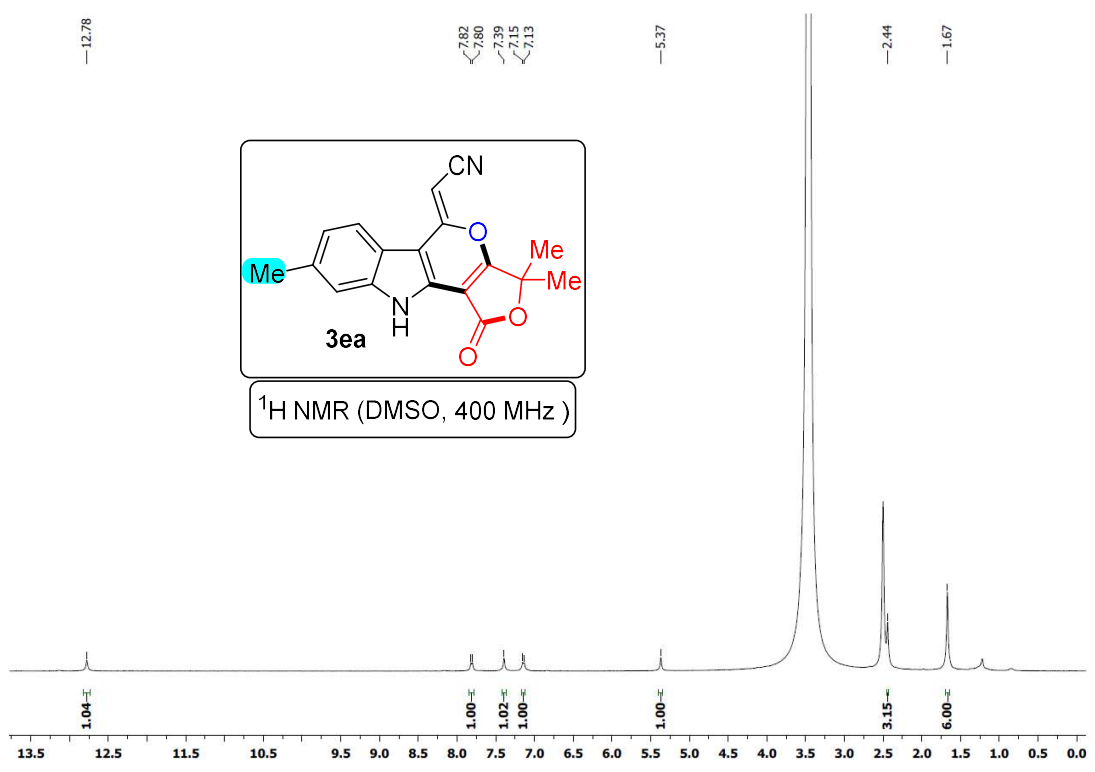

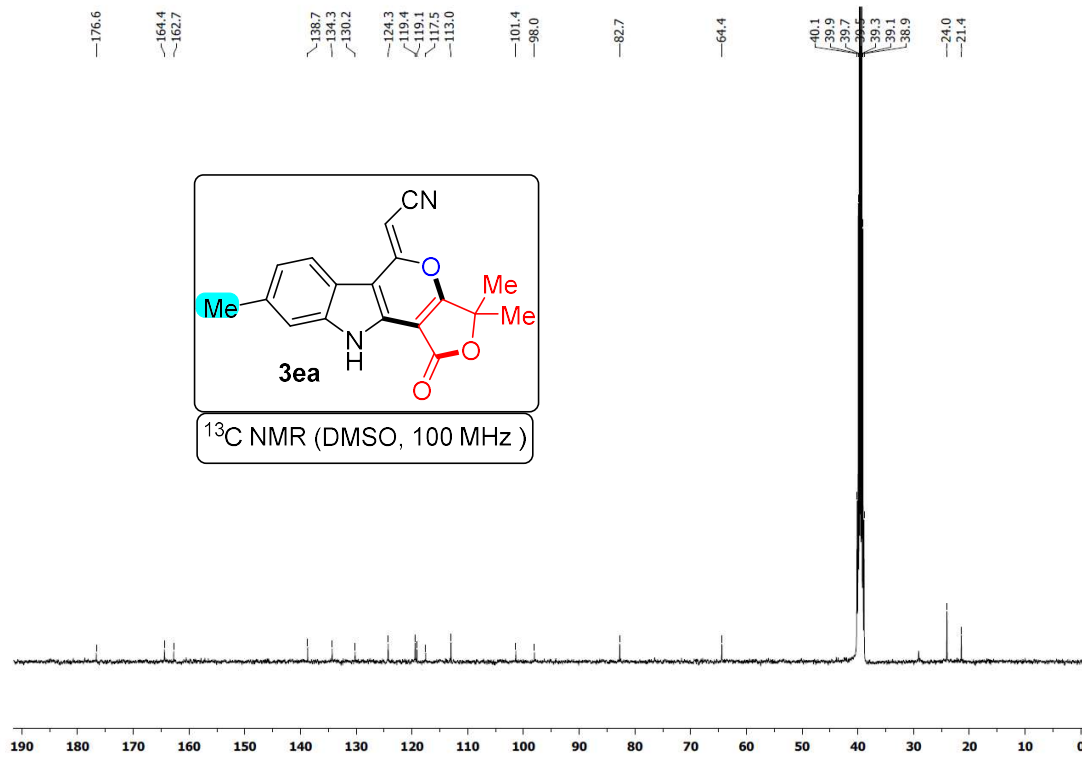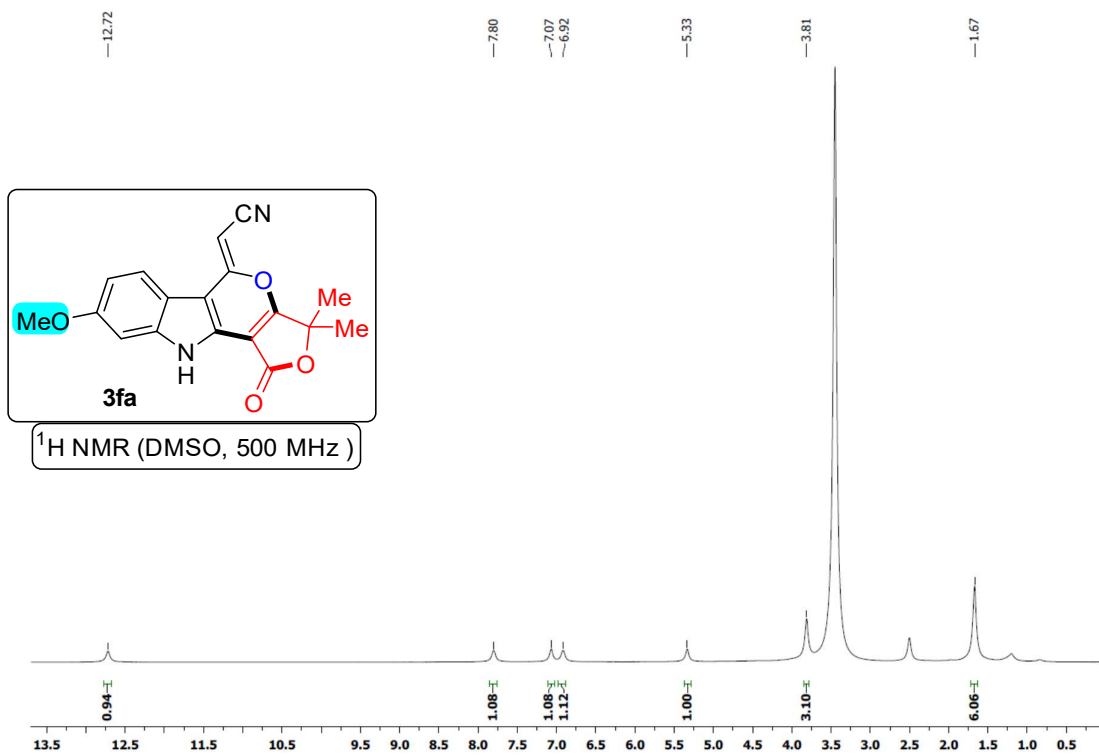

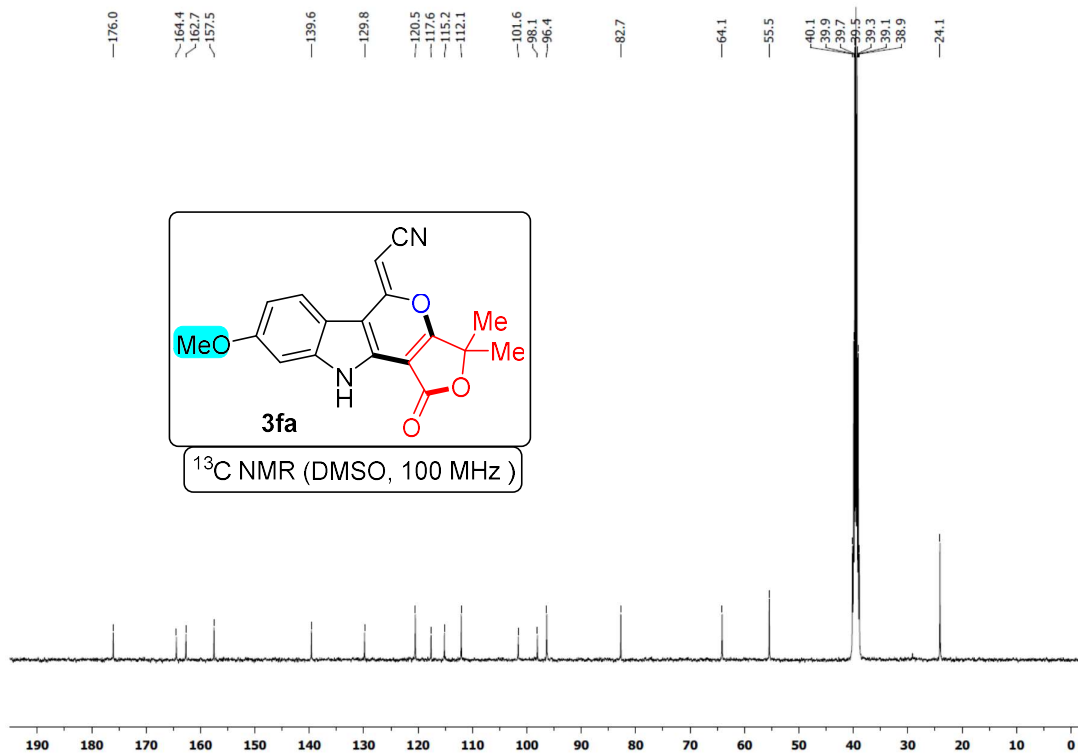

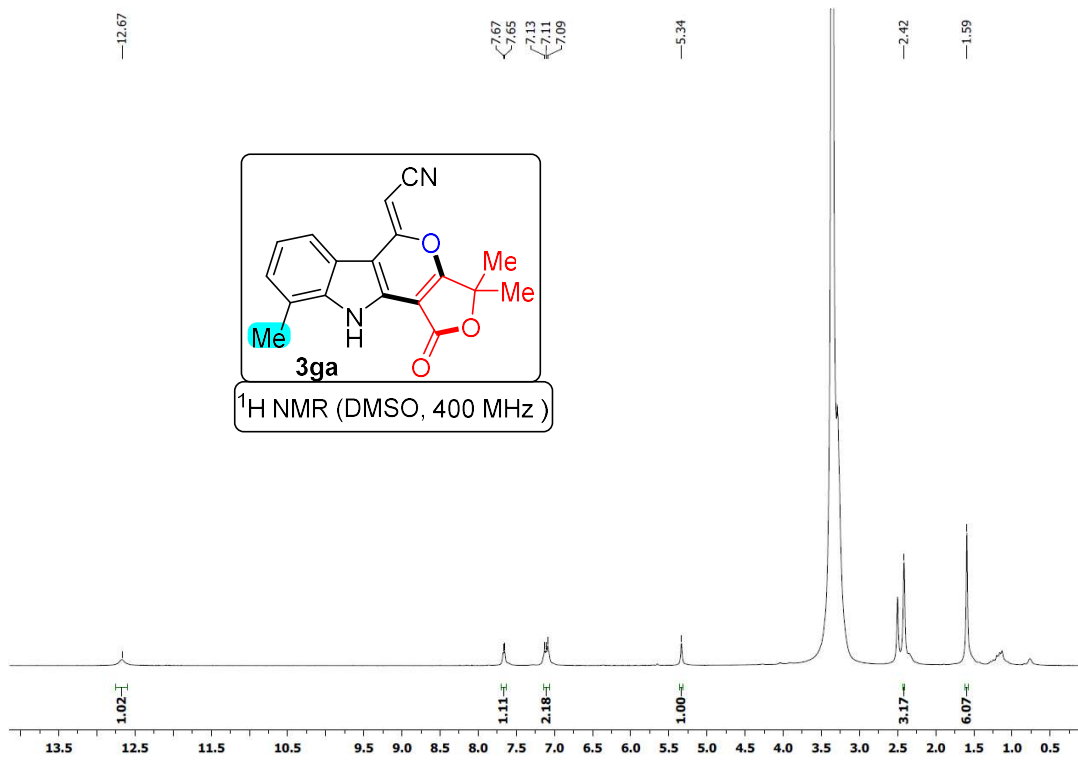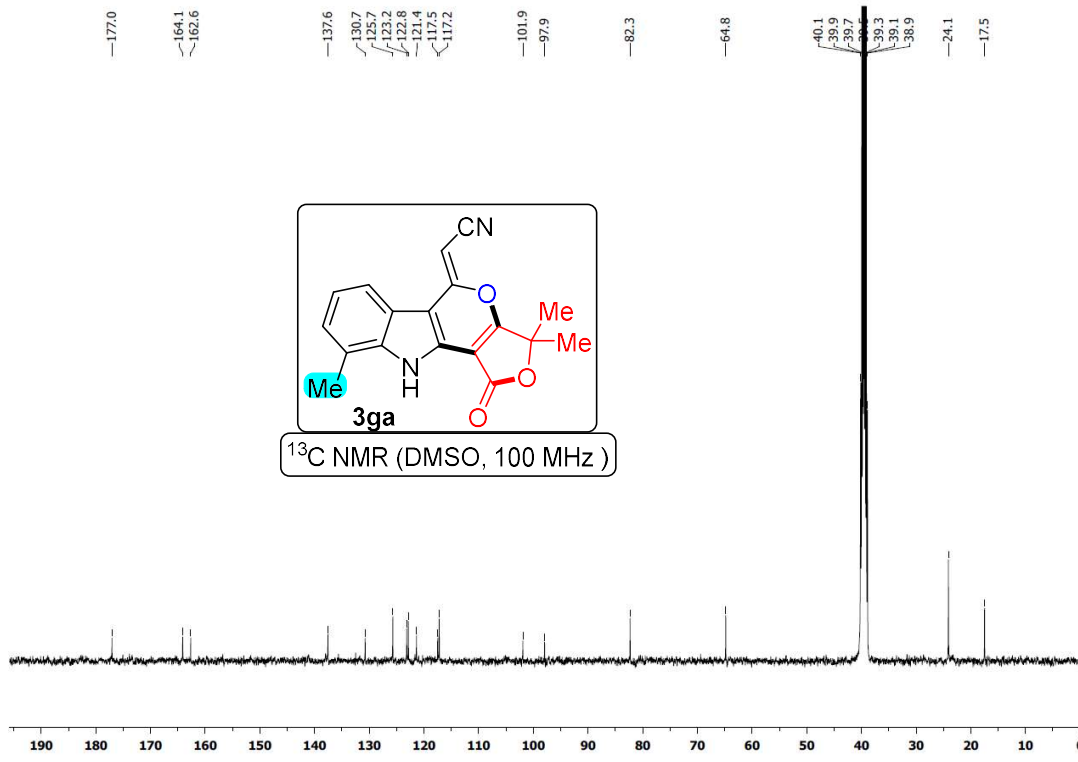

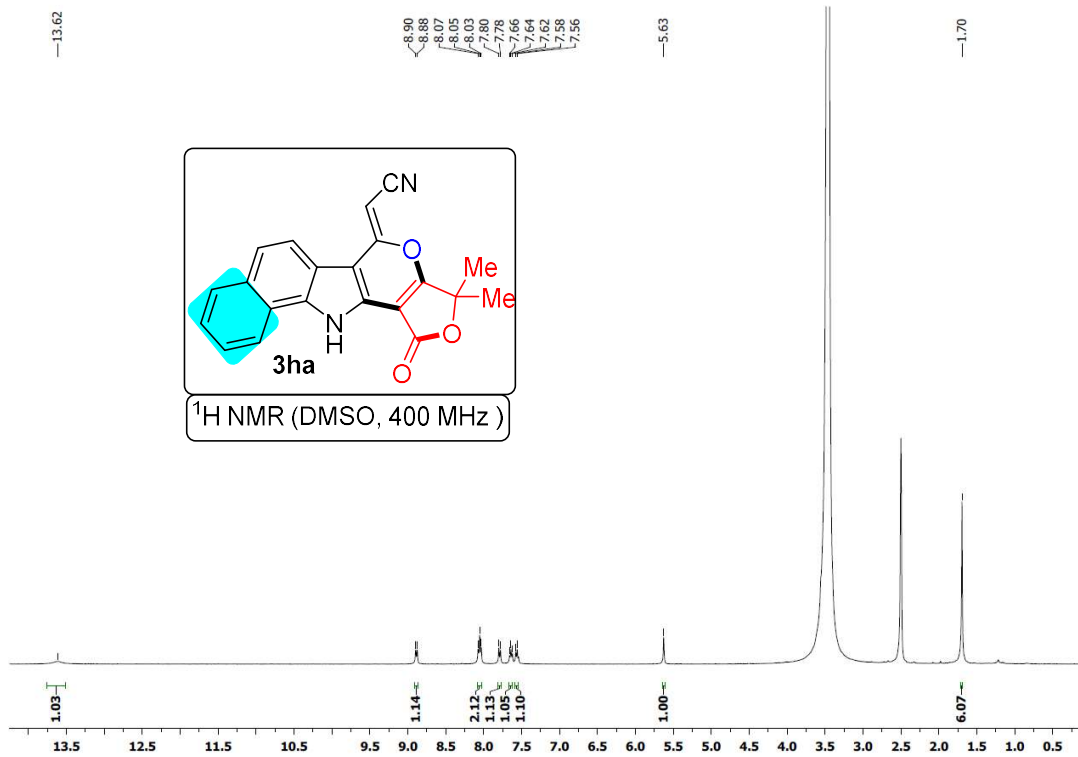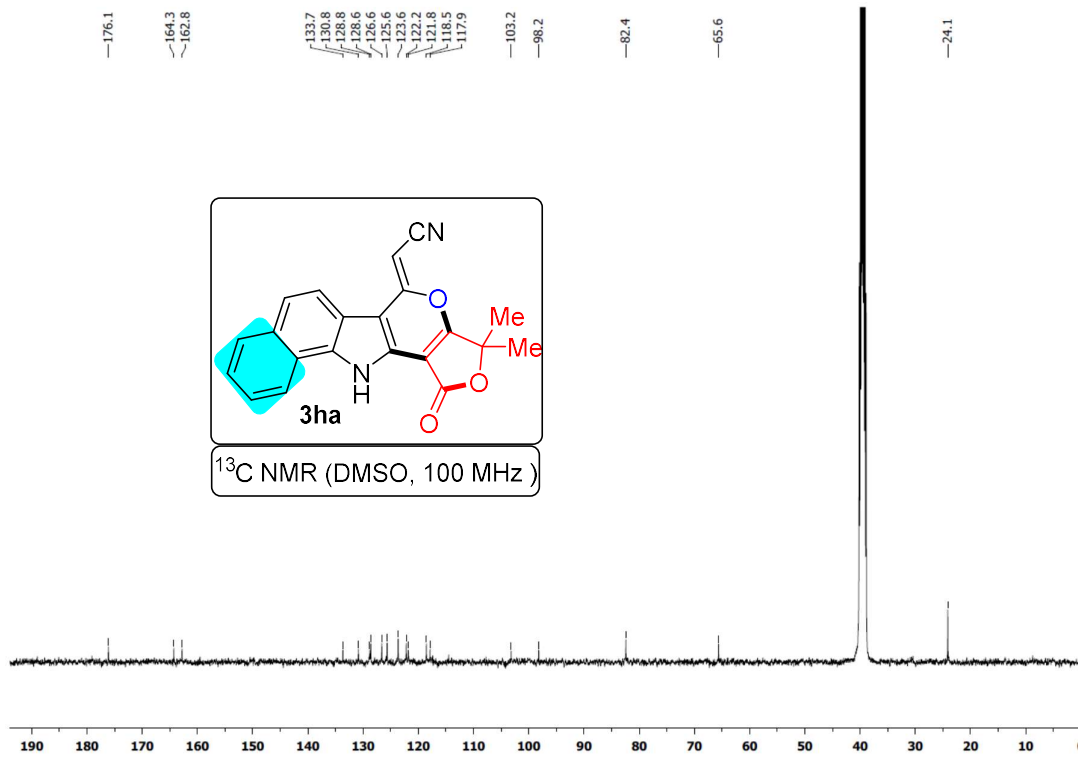

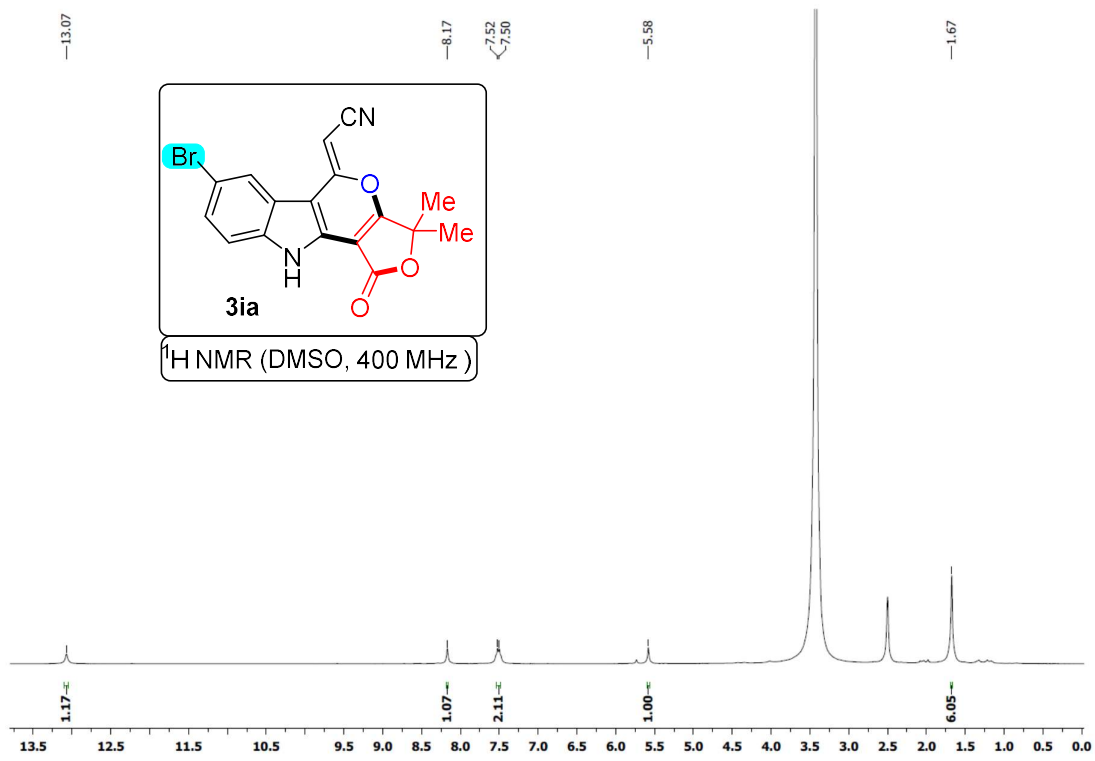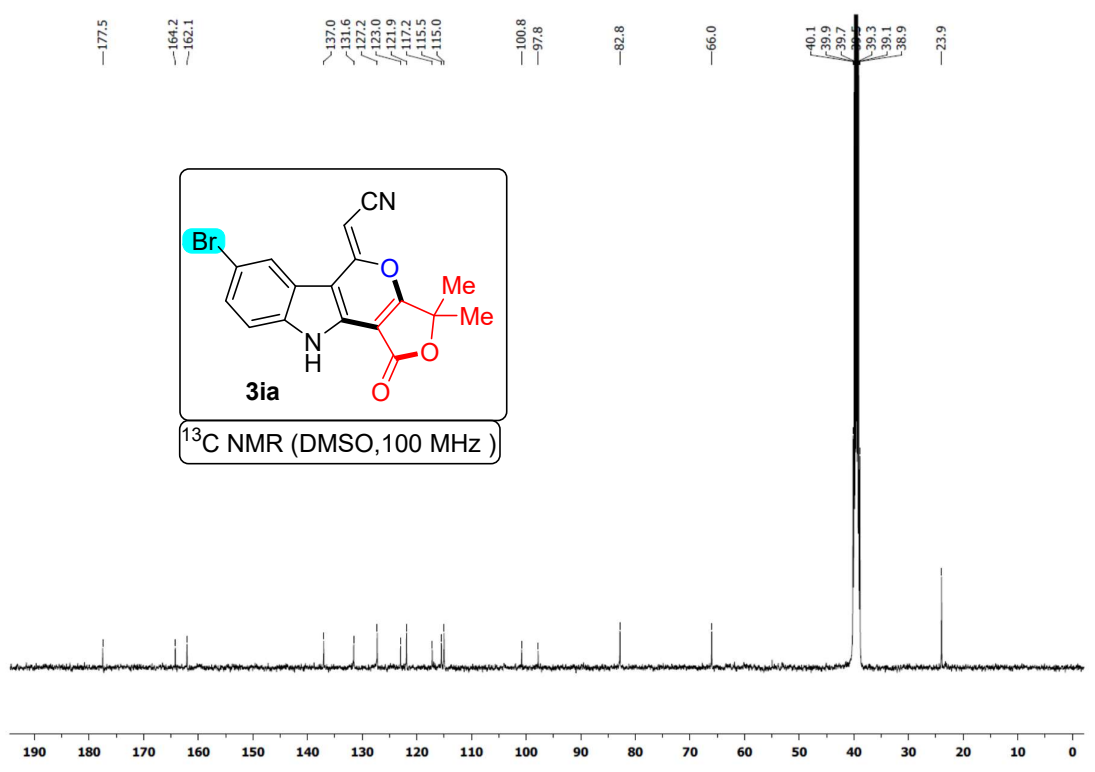

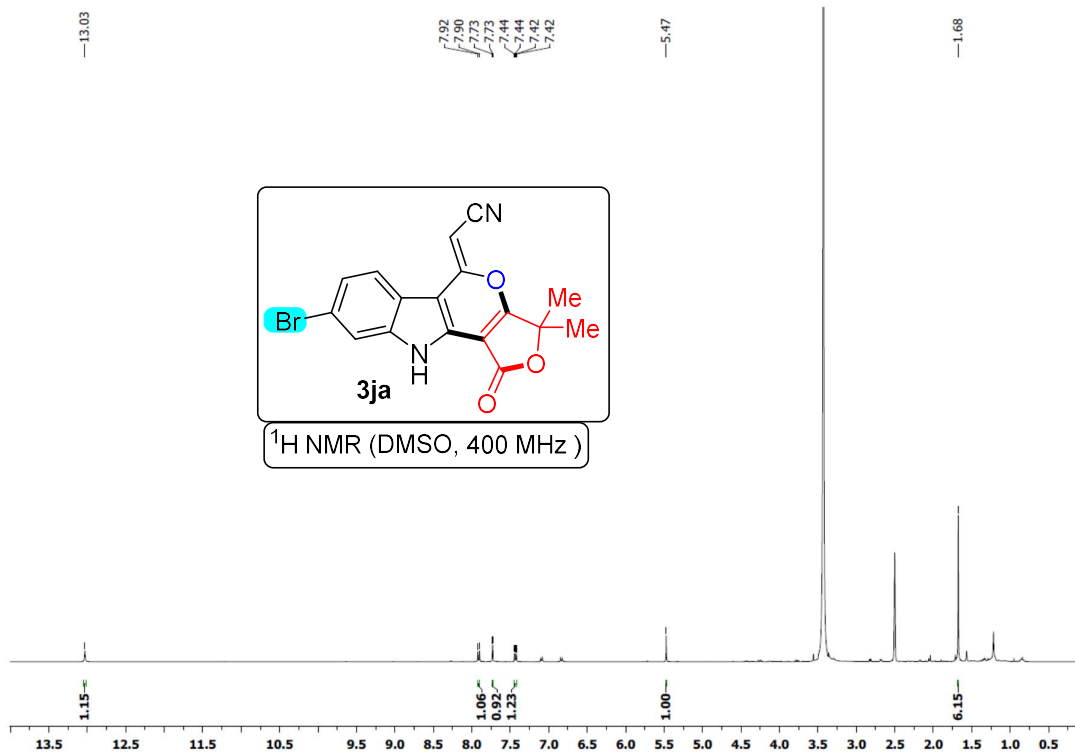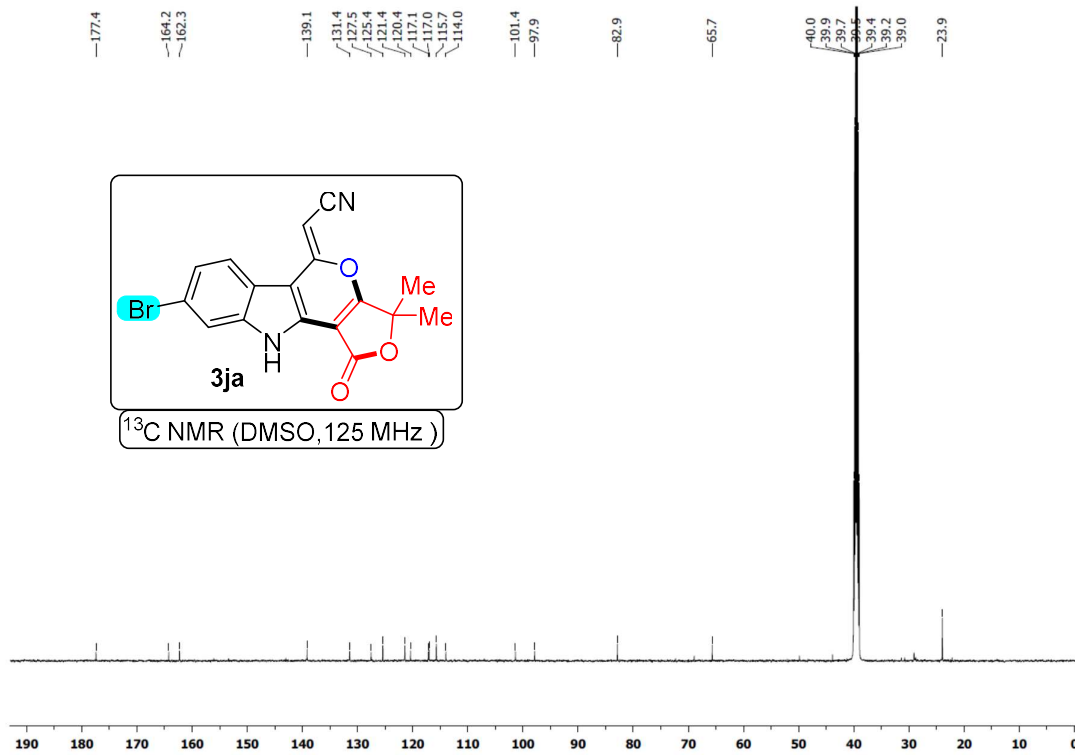



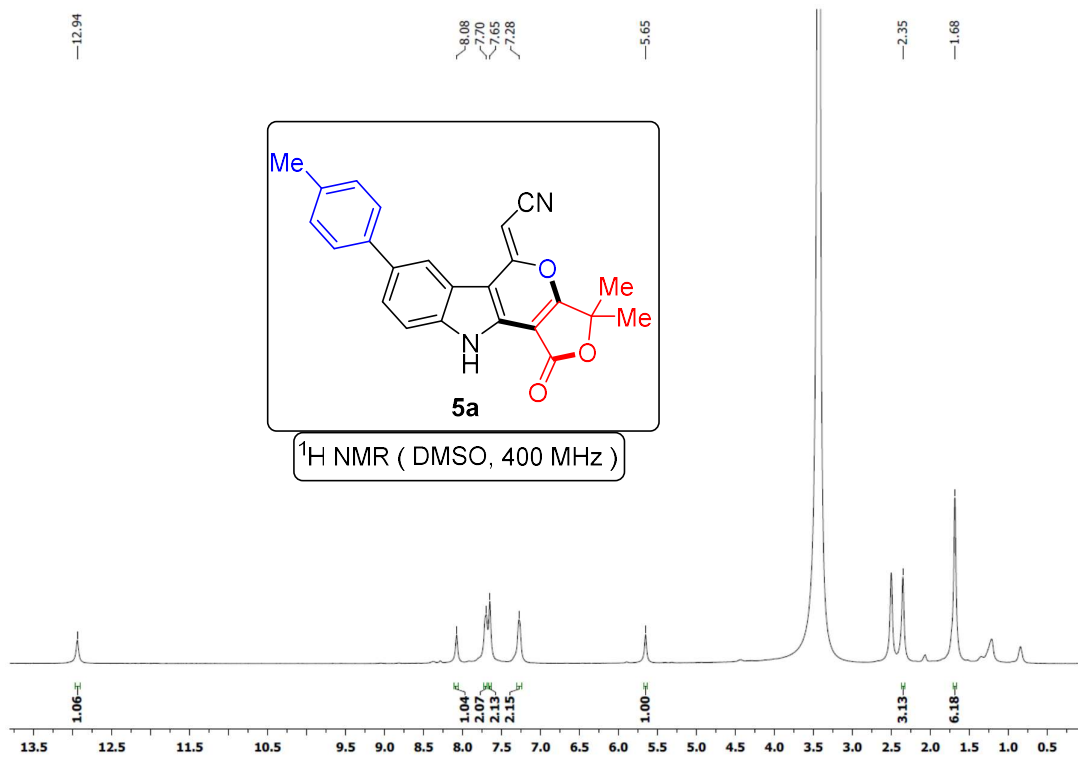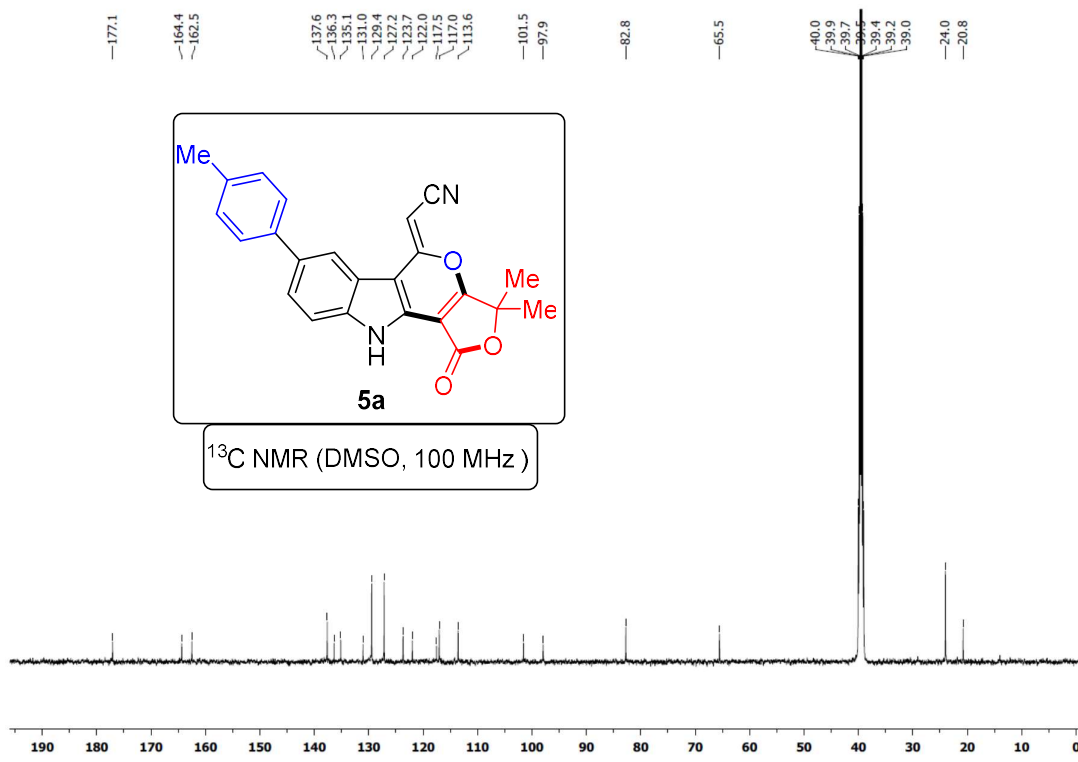

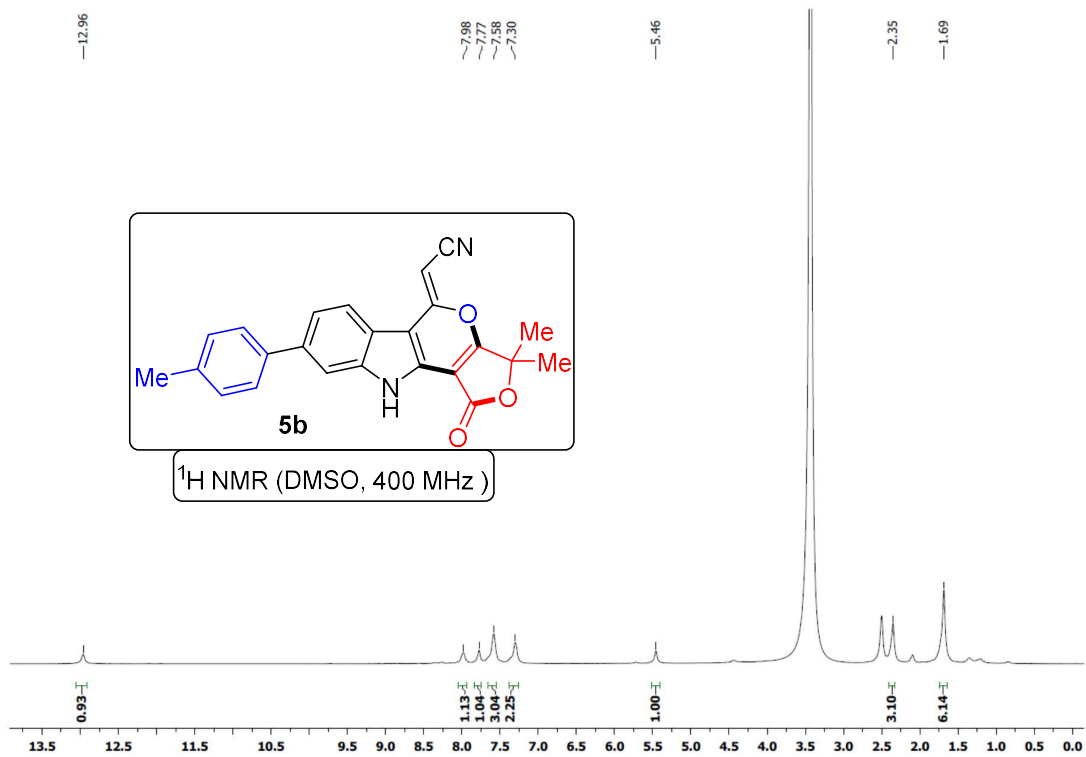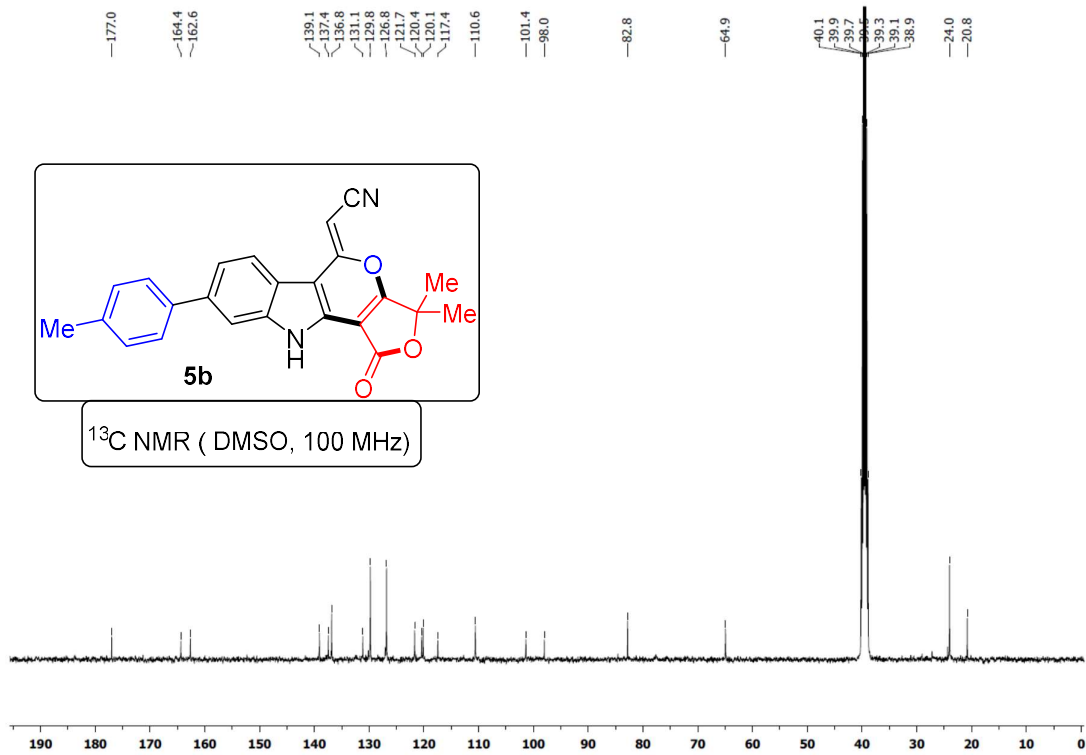

## 8. X-ray crystallography data:

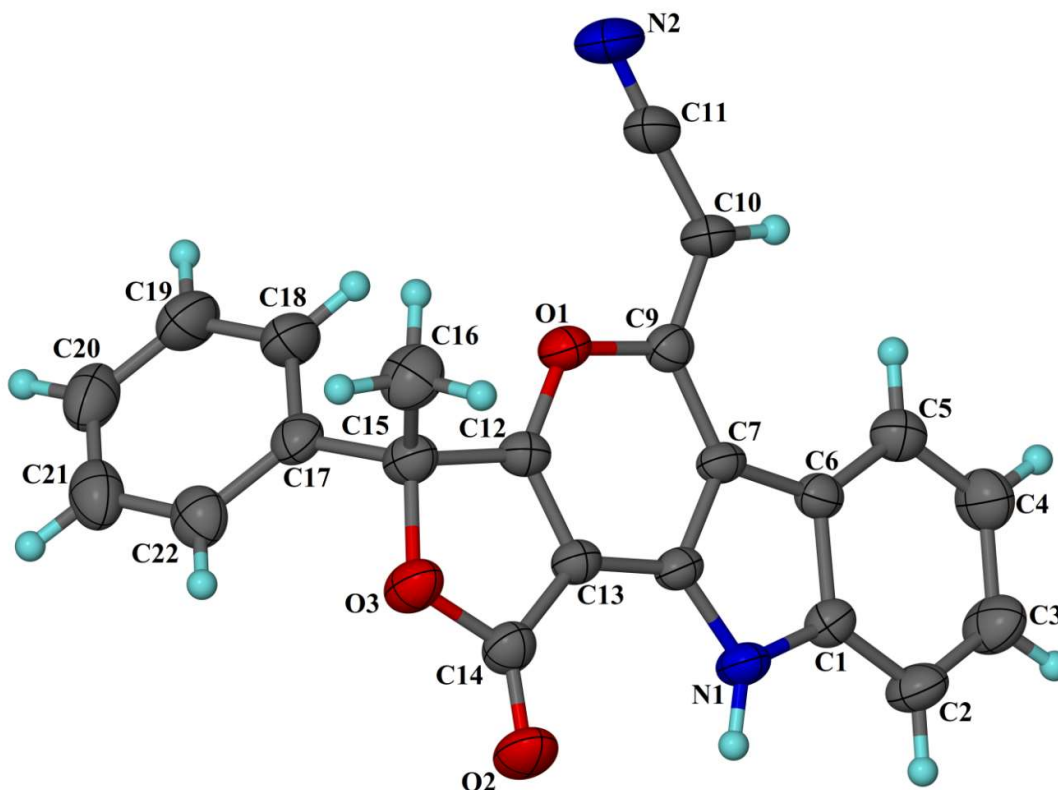

**Sample Preparation for Crystal Growth:** The compound **3aa** was dissolved in acetone in beaker and kept for slow evaporation at room temperature. Formation of needle shape crystals was observed after three days. The single crystals were then subjected to X-ray diffraction analysis.

**Figure caption:** ORTEP diagram of KB658 compound with the atom-numbering. Displacement ellipsoids are drawn at the 50% probability level and H atoms are shown as small spheres of arbitrary radius. **CCDC deposition number 2234910** contains the supplementary crystallographic data for this paper which can be obtained free of charge at <https://www.ccdc.cam.ac.uk/structures/>

**Crystal data for KB658:**  $C_{22}H_{14}N_2O_3$ ,  $M = 354.35$ , Monoclinic, Space group  $Cc$  (No. 9),  $a = 9.8625(12)\text{\AA}$ ,  $b = 24.973(3)\text{\AA}$ ,  $c = 7.5384(10)\text{\AA}$ ,  $\alpha = 90^\circ$ ,  $\beta = 111.143(4)^\circ$ ,  $\gamma = 90^\circ$ ,  $V = 1731.7(4)\text{\AA}^3$ ,  $Z = 4$ ,  $D_c = 1.359\text{ g/cm}^3$ ,  $F_{000} = 736$ , Bruker D8 QUEST PHOTON-III-C7 detector, Mo-K $\alpha$  radiation,  $\lambda = 0.71073\text{ \AA}$ ,  $T = 293(2)\text{K}$ ,  $2\theta_{\text{max}} = 55^\circ$ ,  $\mu = 0.092\text{ mm}^{-1}$ , 22582 reflections collected, 3617 unique ( $R_{\text{int}} = 0.0651$ ), 249 parameters,  $R1 = 0.0394$ ,  $wR2 =$

0.0738,  $R$  indices based on 2539 reflections with  $I > 2\sigma(I)$  (refinement on  $F^2$ ), Final  $Goof = 1.012$ , largest difference hole and peak =  $-0.179$  and  $0.133 \text{ e.}\text{\AA}^{-3}$ .

#### **Data collection and Structure solution details:**

X-ray data for the compound were collected at room temperature on a Bruker D8 QUEST instrument with an I $\mu$ S Mo microsource ( $\lambda = 0.7107\text{\AA}$ ) and a PHOTON-III C7 HPAD detector. The raw data frames were reduced and corrected for absorption effects using the Bruker Apex 3 software suite programs [1]. The structure was solved using intrinsic phasing method [2] and further refined with the SHELXL [2-4] program and expanded using Fourier techniques. Anisotropic displacement parameters were included for all non-hydrogen atoms. All C bound H atoms were positioned geometrically and treated as riding on their parent C atoms [C-H =  $0.93\text{-}0.97 \text{\AA}$ , and  $U_{iso}(H) = 1.5U_{eq}(C)$  for methyl H or  $1.2U_{eq}(C)$  for other H atoms]. The N bound H atom was located in the difference Fourier map. **CCDC deposition number 2234910** contains the supplementary crystallographic data for this paper which can be obtained free of charge at <https://www.ccdc.cam.ac.uk/structures/>

1. Bruker (2016). APEX3, SAINT and SADABS. Bruker AXS, Inc., Madison, Wisconsin, USA.
2. G. M. Sheldrick, *Acta Crystallogr.*, 2015, C71: 3-8.
3. C. B. Hübschle, G. M. Sheldrick and B. Dittrich, ShelXle: a Qt graphical user interface for SHELXL, *J. Appl. Cryst.*, 2011, 44, 1281-1284.
4. Muller, P, Herbst-Imer, R, Spek, A. L, Schneider, T. R, and Sawaya, M. R. *Crystal Structure Refinement: A Crystallographer's Guide to SHELXL*. Muller, P. Ed. 2006 Oxford University Press: Oxford, New York, pp. 57-91.

## checkCIF/PLATON report

Structure factors have been supplied for datablock(s) KB658\_0m\_a

THIS REPORT IS FOR GUIDANCE ONLY. IF USED AS PART OF A REVIEW PROCEDURE FOR PUBLICATION, IT SHOULD NOT REPLACE THE EXPERTISE OF AN EXPERIENCED CRYSTALLOGRAPHIC REFEREE.

No syntax errors found. CIF dictionary Interpreting this report

### Datablock: KB658\_0m\_a

---

Bond precision: C-C = 0.0046 Å Wavelength=0.71073

Cell: a=9.8625 (12) b=24.973 (3) c=7.5384 (10)  
alpha=90 beta=111.143 (4) gamma=90  
Temperature: 293 K

|                        | Calculated    | Reported      |
|------------------------|---------------|---------------|
| Volume                 | 1731.7 (4)    | 1731.7 (4)    |
| Space group            | C c           | C c           |
| Hall group             | C -2yc        | C -2yc        |
| Moiety formula         | C22 H14 N2 O3 | C22 H14 N2 O3 |
| Sum formula            | C22 H14 N2 O3 | C22 H14 N2 O3 |
| Mr                     | 354.35        | 354.35        |
| Dx, g cm <sup>-3</sup> | 1.359         | 1.359         |
| Z                      | 4             | 4             |
| Mu (mm <sup>-1</sup> ) | 0.092         | 0.092         |
| F000                   | 736.0         | 736.0         |
| F000'                  | 736.34        |               |
| h, k, lmax             | 12, 32, 9     | 12, 32, 9     |
| Nref                   | 3966 [ 1991]  | 3617          |
| Tmin, Tmax             | 0.970, 0.976  | 0.637, 0.746  |
| Tmin'                  | 0.969         |               |

Correction method= # Reported T Limits: Tmin=0.637 Tmax=0.746  
AbsCorr = MULTI-SCAN

Data completeness= 1.82/0.91 Theta(max)= 27.500

R(reflections)= 0.0394 ( 2359) wR2(reflections)=  
0.0892 ( 3617)  
S = 1.012 Npar= 249

---

The following ALERTS were generated. Each ALERT has the format  
**test-name\_ALERT\_alert-type\_alert-level.**  
Click on the hyperlinks for more details of the test.

---

**Alert level C**

STRVA01\_ALERT\_4\_C Flack test results are meaningless.  
From the CIF: `_refine_ls_abs_structure_Flack` -0.100  
From the CIF: `_refine_ls_abs_structure_Flack_su` 0.600  
PIAT340\_ALERT\_3\_C Low Bond Precision on C-C Bonds ..... 0.00461 Ang.  
PIAT767\_ALERT\_4\_C INS Embedded LIST 6 Instruction Should be LIST 4 Please Check

---

**Alert level G**

PIAT032\_ALERT\_4\_G Std. Uncertainty on Flack Parameter Value High . 0.600 Report  
PIAT199\_ALERT\_1\_G Reported `_cell_measurement_temperature` .... (K) 293 Check  
PIAT200\_ALERT\_1\_G Reported `_diffrn_ambient_temperature` .... (K) 293 Check  
PIAT792\_ALERT\_1\_G Model has Chirality at C15 (Polar SPGR) R Verify  
PIAT883\_ALERT\_1\_G No Info/Value for `_atom_sites_solution_primary` . Please Do !  
PIAT910\_ALERT\_3\_G Missing # of FCF Reflection(s) Below Theta(Min). 2 Note  
PIAT913\_ALERT\_3\_G Missing # of Very Strong Reflections in FCF ... 1 Note  
PIAT916\_ALERT\_2\_G Hooft y and Flack x Parameter Values Differ by . 0.20 Check  
PIAT933\_ALERT\_2\_G Number of HKL-CMIT Records in Embedded .res File 2 Note  
PIAT967\_ALERT\_5\_G Note: Two-Theta Cutoff Value in Embedded .res .. 55.0 Degree  
PIAT978\_ALERT\_2\_G Number C-C Bonds with Positive Residual Density. 0 Info

---

0 **ALERT level A** - Most likely a serious problem - resolve or explain  
0 **ALERT level B** - A potentially serious problem, consider carefully  
3 **ALERT level C** - Check. Ensure it is not caused by an omission or oversight  
11 **ALERT level G** - General information/check it is not something unexpected

4 ALERT type 1 CIF construction/syntax error, inconsistent or missing data  
3 ALERT type 2 Indicator that the structure model may be wrong or deficient  
3 ALERT type 3 Indicator that the structure quality may be low  
3 ALERT type 4 Improvement, methodology, query or suggestion  
1 ALERT type 5 Informative message, check

---

It is advisable to attempt to resolve as many as possible of the alerts in all categories. Often the minor alerts point to easily fixed oversights, errors and omissions in your CIF or refinement strategy, so attention to these fine details can be worthwhile. In order to resolve some of the more serious problems it may be necessary to carry out additional measurements or structure refinements. However, the purpose of your study may justify the reported deviations and the more serious of these should normally be commented upon in the discussion or experimental section of a paper or in the "special\_details" fields of the CIF. checkCIF was carefully designed to identify outliers and unusual parameters, but every test has its limitations and alerts that are not important in a particular case may appear. Conversely, the absence of alerts does not guarantee there are no aspects of the results needing attention. It is up to the individual to critically assess their own results and, if necessary, seek expert advice.

#### **Publication of your CIF in IUCr journals**

A basic structural check has been run on your CIF. These basic checks will be run on all CIFs submitted for publication in IUCr journals (*Acta Crystallographica*, *Journal of Applied Crystallography*, *Journal of Synchrotron Radiation*); however, if you intend to submit to *Acta Crystallographica Section C or E* or *IUCrData*, you should make sure that full publication checks are run on the final version of your CIF prior to submission.

#### **Publication of your CIF in other journals**

Please refer to the *Notes for Authors* of the relevant journal for any special instructions relating to CIF submission.

---

PLATON version of 28/11/2022; check.def file version of 28/11/2022

Datablock KB658\_0m\_a - ellipsoid plot

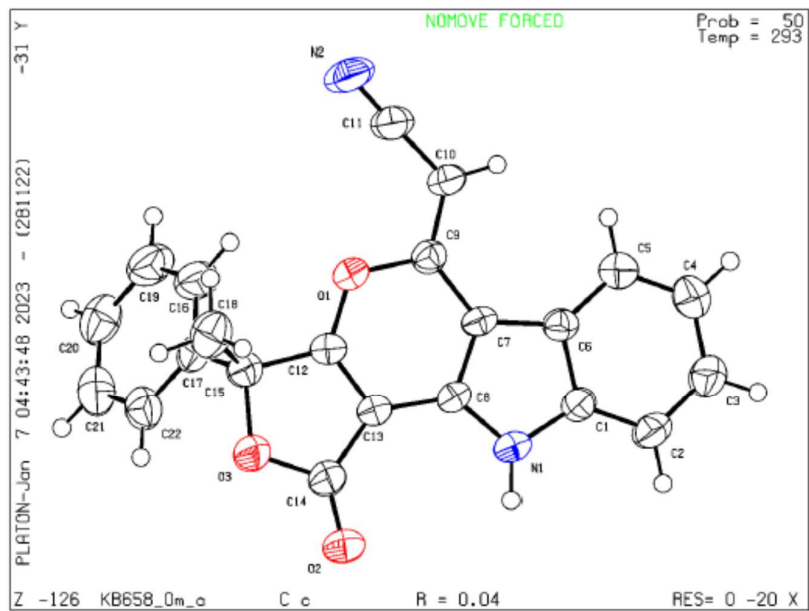



## References:

1. (a) J. Slätt, I. Romero and J. Bergman, *Synthesis.*, 2004, **16**, 2760; (b) Y. Xiao, H. Xiong, S. Sun, J. Yu and J. Cheng, *Org. Biomol. Chem.*, 2018, **16**, 8715.
2. (a) Y. Xu, B. Li, X. Zhang and X. Fan, *Adv. Synth. Catal.*, 2018, **360**, 2613; (b) G. Liao, H. Song, X.-S. Yin and B.-F. Shi, *Chem. Commun.*, 2017, **53**, 7824.
3. C. Palomo, A. Gonzalez, J. M. García, C. Landa, M. Oiarbide, S. Rodríguez and A. Linden, *Angew. Chem., Int. Ed. Engl.*, 1998, **37**, 180.
4. (a) C. Spino and C. Beaulieu, *J. Am. Chem. Soc.*, 1998, **120**, 11832; (b) C. Spino, C. Beaulieu and J. Lafreniere, *J. Org. Chem.*, 2000, **65**, 7091.
5. (a) K. Yan, B. Li and B. Wang, *Adv. Synth. Catal.*, 2018, **360**, 2272; (b) K. Xu, H. Liu, Y. Hou, J. Shen, D. Liu and W. Zhang, *Chem. Commun.*, 2019, **55**, 13295.
6. (a). L. Cooper, J. M. Alonso, L. Eagling , H. Newson, S. Herath, C. Thomson, A. Lister, C. Howsham, B. Cox and M. P. Muñoz, *Chem.–Eur. J.*, 2018, **24**, 6105; (b) H. Sun, Y. Cheng, H. Teng, X. Chen, X. Niu, H. Yang, Y.-M. Cui, L.-W. Xu and L. Yang, *J. Org. Chem.*, 2022, **87**, 13346; (c) M. Kumar, A. Rastogi, Raziullah, A. Ahmad, M. K. Gangwar, and D. Koley, *Org. Lett.* 2022, **48**, 8729.
7. K. Wei, T. Yang, Q. Chen, S. Liang and W. Yu, *Chem. Commun.*, 2020, **56**, 11685.
